# Supplementary material for: Primary care risk stratification in COPD using routinely collected data: a secondary data analysis
Source: PubMed Central journal article supplement (PMC6892877; doi:10.1038/s41533-019-0154-6), 2019-12-04
Supplement: 41533_2019_154_MOESM1_ESM.pdf [file 41533_2019_154_MOESM1_ESM.pdf]

## Supplementary Material

### Read codes

Read codes are widely used to describe routine clinical activity taking place in UK primary care, including diagnoses, symptoms, examination findings, investigations, administration, procedures and medications<sup>1</sup>. As our analysis used primary care data sourced from general practices recording clinical activity using the Read v2 coding system, all of the codes listed in this supplementary material are based on this system unless otherwise specified. A number of general practices included in this analysis use practice management systems provided by EMIS Health, within which a unique set of customised codes are used to record medications, most of which have an analogous Read v2 counterpart. Where appropriate we have listed both the Read v2 and EMIS codes used.

No practices using the CTV3 coding system were included in this analysis, and so no CTV3 codes are listed. However, code mapping tables are publicly available<sup>2</sup> to facilitate migration to this system, as well as future adoption of the SNOMED CT coding system in primary care.

### Cohort definition

We identified our COPD cohort based on the presence of selected diagnostic Read codes in the patient's primary care record prior to 1<sup>st</sup> January 2010. We did not include any 'process of care' codes (for symptoms, signs, management and administration) nor prescribed medication codes consistent with COPD. We included three codes indicative of either acute exacerbation of COPD or COPD with acute lower respiratory tract infection (H3122, H3y0. and H3y1.) that are excluded by the 'Quality and Outcomes Framework' incentive scheme<sup>3,4</sup>.

| Code  | Description                    |
|-------|--------------------------------|
| H3... | Chronic obstructive pulm.dis.  |
| H31.. | Chronic bronchitis             |
| H310. | Simple chronic bronchitis      |
| H3100 | Chronic catarrhal bronchitis   |
| H310z | Simple chronic bronchitis NOS  |
| H311. | Mucopurulent chr.bronchitis    |
| H3110 | Purulent chronic bronchitis    |
| H3111 | Fetid chronic bronchitis       |
| H311z | Mucopurulent chr.bronchit.NOS  |
| H312. | Obstructive chronic bronchitis |
| H3120 | Chronic asthmatic bronchitis   |
| H3121 | Emphysematous bronchitis       |
| H3122 | Acute exacerbation of COAD     |
| H3123 | Bronchiolitis obliterans       |
| H312z | Obstructive chr.bronchitis NOS |
| H313. | Mixd simp+mucopur chron bronch |
| H31y. | Other chronic bronchitis       |
| H31y1 | Chronic tracheobronchitis      |
| H31yz | Other chronic bronchitis NOS   |
| H31z. | Chronic bronchitis NOS         |
| H32.. | Emphysema                      |
| H320. | Chronic bullous emphysema      |
| H3200 | Segmental bullous emphysema    |
| H3201 | Zonal bullous emphysema        |
| H3202 | Giant bullous emphysema        |
| H3203 | Bullous emphysema + collapse   |
| H320z | Chronic bullous emphysema NOS  |

|       |                                |
|-------|--------------------------------|
| H321. | Panlobular emphysema           |
| H322. | Centrilobular emphysema        |
| H32y. | Other emphysema                |
| H32y0 | Acute vesicular emphysema      |
| H32y1 | Atrophic (senile) emphysema    |
| H32y2 | MacLeod's unilateral emphysema |
| H32yz | Other emphysema NOS            |
| H32z. | Emphysema NOS                  |
| H36.. | Mild chron obstr pulm disease  |
| H37.. | Mod chron obstr pulm disease   |
| H38.. | Sev chron obstr pulm disease   |
| H39.. | Very severe COPD               |
| H3A.. | End stag chron obst airway dis |
| H3y.. | Chronic obstr.airway dis.OS    |
| H3y0. | Chr obs pulm dis+ac l resp inf |
| H3y1. | Chr obs pulm dis+ac exac       |
| H3z.. | Chronic obstr.airway dis.NOS   |
| H4640 | Chronic chemical emphysema     |
| H4641 | Chemical obliter.bronchiolitis |
| Hyu30 | [X]Other emphysema             |
| Hyu31 | [X]O spcf chron obs pulmon dis |

### Identifying COPD exacerbations

Four separate definitions bridging primary and secondary care data sources were used to identify COPD exacerbation events:

- i) Acute COPD exacerbation in the patient's primary care record;
- ii) COPD symptom or restated diagnosis in the patient's primary care record within seven days before or after a respiratory antibiotic or oral corticosteroid prescription;
- iii) COPD-related non-elective inpatient admission in the patient's secondary care record;
- iv) Respiratory-related emergency department attendance in the patient's secondary care record.

Secondary care non-elective inpatient and emergency department (ED) activity was sourced from the Secondary Uses Service dataset <sup>5</sup>. COPD-related diagnosis codes from the tenth revision of the International Classification of Diseases (ICD10) <sup>6</sup> were used to identify inpatient exacerbation events (where recorded in the primary or first, second or third secondary diagnosis positions) and some ED events. Non-elective admissions were defined as those with an admission method of '21', '22', '23', '24' or '2A' <sup>7</sup>. The remaining ED exacerbations were identified using the respiratory-related Accident and Emergency Diagnosis code '25' (where recorded in either first or second diagnosis positions) <sup>8</sup>.

Two separate exacerbation time series were created: the first consisting only of events identified using stand-alone primary care (SaPC) data under definitions (i) and (ii); the second of events identified using linked primary care/secondary care (PC/SC) data and all definitions. Commencing from 1<sup>st</sup> January 2010, all events occurring within a continuous 21 day period were interpreted as describing a single exacerbation episode, with the initial event taken as the incident date. The next event occurring on or after the 22<sup>nd</sup> day was taken as the incident event of a new episode.

| Code  | Description                    | Definition                     |
|-------|--------------------------------|--------------------------------|
| H3122 | Acute exacerbation of COAD     | (i) Acute COPD exacerbation    |
| H3y1. | Chr obs pulm dis+ac exac       | (i) Acute COPD exacerbation    |
| 16L.. | Influenza-like symptoms        | (ii) COPD symptom or diagnosis |
| 171.. | Cough                          | (ii) COPD symptom or diagnosis |
| 1713. | Productive cough -clear sputum | (ii) COPD symptom or diagnosis |

|       |                                |                                |
|-------|--------------------------------|--------------------------------|
| 1714. | Productive cough -green sputum | (ii) COPD symptom or diagnosis |
| 1715. | Productive cough-yellow sputum | (ii) COPD symptom or diagnosis |
| 1716. | Productive cough NOS           | (ii) COPD symptom or diagnosis |
| 1717. | Night cough present            | (ii) COPD symptom or diagnosis |
| 1719. | Chesty cough                   | (ii) COPD symptom or diagnosis |
| 171A. | Chronic cough                  | (ii) COPD symptom or diagnosis |
| 171B. | Persistent cough               | (ii) COPD symptom or diagnosis |
| 171C. | Morning cough                  | (ii) COPD symptom or diagnosis |
| 171D. | Evening cough                  | (ii) COPD symptom or diagnosis |
| 171F. | Cough with fever               | (ii) COPD symptom or diagnosis |
| 171H. | Difficulty coughing up sputum  | (ii) COPD symptom or diagnosis |
| 171L. | Cough on exercise              | (ii) COPD symptom or diagnosis |
| 171Z. | Cough symptom NOS              | (ii) COPD symptom or diagnosis |
| 172.. | Blood in sputum - haemoptysis  | (ii) COPD symptom or diagnosis |
| 173.. | Breathlessness                 | (ii) COPD symptom or diagnosis |
| 1732. | Breathless - moderate exertion | (ii) COPD symptom or diagnosis |
| 1733. | Breathless - mild exertion     | (ii) COPD symptom or diagnosis |
| 1734. | Breathless - at rest           | (ii) COPD symptom or diagnosis |
| 1735. | Breathless - lying flat        | (ii) COPD symptom or diagnosis |
| 1737. | Wheezing                       | (ii) COPD symptom or diagnosis |
| 1738. | Difficulty breathing           | (ii) COPD symptom or diagnosis |
| 1739. | Shortness of breath            | (ii) COPD symptom or diagnosis |
| 173b. | Unab compl sentence one breath | (ii) COPD symptom or diagnosis |
| 173B. | Nocturnal cough / wheeze       | (ii) COPD symptom or diagnosis |
| 173C. | Short of breath on exertion    | (ii) COPD symptom or diagnosis |
| 173D. | Nocturnal dyspnoea             | (ii) COPD symptom or diagnosis |
| 173F. | SOB dressing/undressing        | (ii) COPD symptom or diagnosis |
| 173g. | Breathlessness csg diff eating | (ii) COPD symptom or diagnosis |
| 173G. | Breathless - strenuous exertn  | (ii) COPD symptom or diagnosis |
| 173Z. | Breathlessness NOS             | (ii) COPD symptom or diagnosis |
| 189.. | Worsening exercise tolerance   | (ii) COPD symptom or diagnosis |
| 1W0.. | Possible influenza A vir H1N1  | (ii) COPD symptom or diagnosis |
| 2322. | O/E - dyspnoea                 | (ii) COPD symptom or diagnosis |
| 2324. | O/E - respiratory distress     | (ii) COPD symptom or diagnosis |
| 2DE3. | O/E - respiratory obstruction  | (ii) COPD symptom or diagnosis |
| 41D4. | Sputum sample obtained         | (ii) COPD symptom or diagnosis |
| 4E... | Sputum examination             | (ii) COPD symptom or diagnosis |
| 4E1.. | Sputum examination - general   | (ii) COPD symptom or diagnosis |
| 4E11. | Sputum sent for examination    | (ii) COPD symptom or diagnosis |
| 4E13. | Sputum examination: abnormal   | (ii) COPD symptom or diagnosis |
| 4E14. | Sputum - not infected          | (ii) COPD symptom or diagnosis |
| 4E1Z. | Sputum gen. exam. NOS          | (ii) COPD symptom or diagnosis |
| 4E2.. | Sputum inspection              | (ii) COPD symptom or diagnosis |
| 4E21. | Sputum appears normal          | (ii) COPD symptom or diagnosis |
| 4E22. | Sputum: excessive - mucoid     | (ii) COPD symptom or diagnosis |
| 4E23. | Sputum: mucopurulent           | (ii) COPD symptom or diagnosis |
| 4E24. | Sputum: contains blood         | (ii) COPD symptom or diagnosis |
| 4E25. | Sputum: frothy/watery          | (ii) COPD symptom or diagnosis |
| 4E26. | Sputum: fetid/offensive        | (ii) COPD symptom or diagnosis |
| 4E27. | Clear sputum                   | (ii) COPD symptom or diagnosis |
| 4E28. | Yellow sputum                  | (ii) COPD symptom or diagnosis |
| 4E29. | Green sputum                   | (ii) COPD symptom or diagnosis |
| 4E290 | Dark green sputum              | (ii) COPD symptom or diagnosis |
| 4E291 | Pale green sputum              | (ii) COPD symptom or diagnosis |
| 4E2A. | Sputum appearance              | (ii) COPD symptom or diagnosis |
| 4E2C. | Brown sputum                   | (ii) COPD symptom or diagnosis |
| 4E2D. | White sputum                   | (ii) COPD symptom or diagnosis |
| 4E2E. | Volume of sputum               | (ii) COPD symptom or diagnosis |

|       |                                 |                                |
|-------|---------------------------------|--------------------------------|
| 4E2E0 | Copious sputum                  | (ii) COPD symptom or diagnosis |
| 4E2E1 | Moderate sputum                 | (ii) COPD symptom or diagnosis |
| 4E2E3 | Scanty sputum                   | (ii) COPD symptom or diagnosis |
| 4E2F. | Grey sputum                     | (ii) COPD symptom or diagnosis |
| 4E2G. | Bloodstained sputum             | (ii) COPD symptom or diagnosis |
| 4E2Z. | Sputum inspection NOS           | (ii) COPD symptom or diagnosis |
| 4E3.. | Sputum microscopy               | (ii) COPD symptom or diagnosis |
| 4E36. | Sputum: pus cells present       | (ii) COPD symptom or diagnosis |
| 4E37. | Sputum: organism on gram stain  | (ii) COPD symptom or diagnosis |
| 4E3Z. | Sputum microscopy NOS           | (ii) COPD symptom or diagnosis |
| 4E4.. | Sputum culture                  | (ii) COPD symptom or diagnosis |
| 4EZ.. | Sputum examination NOS          | (ii) COPD symptom or diagnosis |
| 4I1E. | Respiratory MC&S                | (ii) COPD symptom or diagnosis |
| 4I2F. | Lower respiratory sample        | (ii) COPD symptom or diagnosis |
| 4JF5. | Sputum sent for C/S             | (ii) COPD symptom or diagnosis |
| 6635. | Increasing exercise wheeze      | (ii) COPD symptom or diagnosis |
| 663F. | Oral steroids started           | (ii) COPD symptom or diagnosis |
| 663L. | Bronchodilators used > 1 /day   | (ii) COPD symptom or diagnosis |
| 66Yg. | COPD disturbs sleep             | (ii) COPD symptom or diagnosis |
| 8BP8. | AB therapy acute pulmon exacer  | (ii) COPD symptom or diagnosis |
| 8H2R. | Admit COPD emergency            | (ii) COPD symptom or diagnosis |
| 8H7j. | Refer respir rapid respon team  | (ii) COPD symptom or diagnosis |
| H0... | Acute respiratory infections    | (ii) COPD symptom or diagnosis |
| H05.. | Other acute upper resp.infect.  | (ii) COPD symptom or diagnosis |
| H051. | Acute up resp tract infection   | (ii) COPD symptom or diagnosis |
| H05z. | Upper respiratory infect.NOS    | (ii) COPD symptom or diagnosis |
| H06.. | Acute bronchitis/bronchiolitis  | (ii) COPD symptom or diagnosis |
| H060. | Acute bronchitis                | (ii) COPD symptom or diagnosis |
| H0600 | Acute fibrinous bronchitis      | (ii) COPD symptom or diagnosis |
| H0601 | Acute membranous bronchitis     | (ii) COPD symptom or diagnosis |
| H0602 | Acute pseudomembranous bronch.  | (ii) COPD symptom or diagnosis |
| H0603 | Acute purulent bronchitis       | (ii) COPD symptom or diagnosis |
| H0604 | Acute croupous bronchitis       | (ii) COPD symptom or diagnosis |
| H0605 | Acute tracheobronchitis         | (ii) COPD symptom or diagnosis |
| H0606 | Acute pneumococcal bronchitis   | (ii) COPD symptom or diagnosis |
| H0607 | Acute streptococcal bronchitis  | (ii) COPD symptom or diagnosis |
| H0608 | Acute H.influenzae bronchitis   | (ii) COPD symptom or diagnosis |
| H060A | Ac bronch/mycoplasma pneumonia  | (ii) COPD symptom or diagnosis |
| H060B | Acute bronch due coxsackievirus | (ii) COPD symptom or diagnosis |
| H060C | Acute bronch/parainfluenza vir  | (ii) COPD symptom or diagnosis |
| H060D | Acute bronch/resp syncytial vir | (ii) COPD symptom or diagnosis |
| H060E | Acute bronchitis/rhinovirus     | (ii) COPD symptom or diagnosis |
| H060F | Acute bronchitis/echovirus      | (ii) COPD symptom or diagnosis |
| H060v | Subacute bronchitis unspecif.   | (ii) COPD symptom or diagnosis |
| H060w | Acute viral bronchitis unspec.  | (ii) COPD symptom or diagnosis |
| H060x | Acute bact.bronchitis unspec.   | (ii) COPD symptom or diagnosis |
| H060z | Acute bronchitis NOS            | (ii) COPD symptom or diagnosis |
| H062. | Acute low resptract infection   | (ii) COPD symptom or diagnosis |
| H06z. | Acute bronchitis/bronchiol.NOS  | (ii) COPD symptom or diagnosis |
| H06z0 | Chest infection NOS             | (ii) COPD symptom or diagnosis |
| H06z1 | Lower resp tract infection      | (ii) COPD symptom or diagnosis |
| H06z2 | Recurrent chest infection       | (ii) COPD symptom or diagnosis |
| H07.. | Chest cold                      | (ii) COPD symptom or diagnosis |
| H0y.. | Acute respiratory infectns.OS   | (ii) COPD symptom or diagnosis |
| H0z.. | Acute respiratory infectn.NOS   | (ii) COPD symptom or diagnosis |
| H27.. | Influenza                       | (ii) COPD symptom or diagnosis |
| H271. | Influenza + other resp.manif.   | (ii) COPD symptom or diagnosis |
| H2710 | Influenza + laryngitis          | (ii) COPD symptom or diagnosis |

|       |                                |                                |
|-------|--------------------------------|--------------------------------|
| H2711 | Influenza + pharyngitis        | (ii) COPD symptom or diagnosis |
| H271z | Influenza + resp.manifest.NOS  | (ii) COPD symptom or diagnosis |
| H27y. | Influenza + other manifestat.  | (ii) COPD symptom or diagnosis |
| H27y0 | Influenza + encephalopathy     | (ii) COPD symptom or diagnosis |
| H27y1 | Influenza + GIT involvement    | (ii) COPD symptom or diagnosis |
| H27yz | Influenza + other manifest.NOS | (ii) COPD symptom or diagnosis |
| H27z. | Influenza NOS                  | (ii) COPD symptom or diagnosis |
| H3... | Chronic obstructive pulm.dis.  | (ii) COPD symptom or diagnosis |
| H30.. | Bronchitis unspecified         | (ii) COPD symptom or diagnosis |
| H300. | Tracheobronchitis NOS          | (ii) COPD symptom or diagnosis |
| H301. | Laryngotracheobronchitis       | (ii) COPD symptom or diagnosis |
| H302. | Wheezing bronchitis            | (ii) COPD symptom or diagnosis |
| H30z. | Bronchitis NOS                 | (ii) COPD symptom or diagnosis |
| H31.. | Chronic bronchitis             | (ii) COPD symptom or diagnosis |
| H310. | Simple chronic bronchitis      | (ii) COPD symptom or diagnosis |
| H3100 | Chronic catarrhal bronchitis   | (ii) COPD symptom or diagnosis |
| H3101 | Smokers' cough                 | (ii) COPD symptom or diagnosis |
| H310z | Simple chronic bronchitis NOS  | (ii) COPD symptom or diagnosis |
| H311. | Mucopurulent chr.bronchitis    | (ii) COPD symptom or diagnosis |
| H3110 | Purulent chronic bronchitis    | (ii) COPD symptom or diagnosis |
| H3111 | Fetid chronic bronchitis       | (ii) COPD symptom or diagnosis |
| H311z | Mucopurulent chr.bronchit.NOS  | (ii) COPD symptom or diagnosis |
| H312. | Obstructive chronic bronchitis | (ii) COPD symptom or diagnosis |
| H3120 | Chronic asthmatic bronchitis   | (ii) COPD symptom or diagnosis |
| H3121 | Emphysematous bronchitis       | (ii) COPD symptom or diagnosis |
| H3122 | Acute exacerbation of COAD     | (ii) COPD symptom or diagnosis |
| H3123 | Bronchiolitis obliterans       | (ii) COPD symptom or diagnosis |
| H312z | Obstructive chr.bronchitis NOS | (ii) COPD symptom or diagnosis |
| H313. | Mixd simp+mucopur chron bronch | (ii) COPD symptom or diagnosis |
| H31y. | Other chronic bronchitis       | (ii) COPD symptom or diagnosis |
| H31y1 | Chronic tracheobronchitis      | (ii) COPD symptom or diagnosis |
| H31yz | Other chronic bronchitis NOS   | (ii) COPD symptom or diagnosis |
| H31z. | Chronic bronchitis NOS         | (ii) COPD symptom or diagnosis |
| H32.. | Emphysema                      | (ii) COPD symptom or diagnosis |
| H320. | Chronic bullous emphysema      | (ii) COPD symptom or diagnosis |
| H3200 | Segmental bullous emphysema    | (ii) COPD symptom or diagnosis |
| H3201 | Zonal bullous emphysema        | (ii) COPD symptom or diagnosis |
| H3202 | Giant bullous emphysema        | (ii) COPD symptom or diagnosis |
| H3203 | Bullous emphysema + collapse   | (ii) COPD symptom or diagnosis |
| H320z | Chronic bullous emphysema NOS  | (ii) COPD symptom or diagnosis |
| H321. | Panlobular emphysema           | (ii) COPD symptom or diagnosis |
| H322. | Centrilobular emphysema        | (ii) COPD symptom or diagnosis |
| H32y. | Other emphysema                | (ii) COPD symptom or diagnosis |
| H32y0 | Acute vesicular emphysema      | (ii) COPD symptom or diagnosis |
| H32y1 | Atrophic (senile) emphysema    | (ii) COPD symptom or diagnosis |
| H32y2 | MacLeod's unilateral emphysema | (ii) COPD symptom or diagnosis |
| H32yz | Other emphysema NOS            | (ii) COPD symptom or diagnosis |
| H32z. | Emphysema NOS                  | (ii) COPD symptom or diagnosis |
| H36.. | Mild chron obstr pulm disease  | (ii) COPD symptom or diagnosis |
| H37.. | Mod chron obstr pulm disease   | (ii) COPD symptom or diagnosis |
| H38.. | Sev chron obstr pulm disease   | (ii) COPD symptom or diagnosis |
| H39.. | Very severe COPD               | (ii) COPD symptom or diagnosis |
| H3A.. | End stag chron obst airway dis | (ii) COPD symptom or diagnosis |
| H3y.. | Chronic obstr.airway dis.OS    | (ii) COPD symptom or diagnosis |
| H3y0. | Chr obs pulm dis+ac l resp inf | (ii) COPD symptom or diagnosis |
| H3y1. | Chr obs pulm dis+ac exac       | (ii) COPD symptom or diagnosis |
| H3z.. | Chronic obstr.airway dis.NOS   | (ii) COPD symptom or diagnosis |
| H460. | Chemical bronchitis/pneumonit. | (ii) COPD symptom or diagnosis |

|                |                                |                                    |
|----------------|--------------------------------|------------------------------------|
| H4600          | Acute chemical bronchitis      | (ii) COPD symptom or diagnosis     |
| H460z          | Chemical bronch/pneumonit NOS  | (ii) COPD symptom or diagnosis     |
| H4640          | Chronic chemical emphysema     | (ii) COPD symptom or diagnosis     |
| H4641          | Chemical obliter.bronchiolitis | (ii) COPD symptom or diagnosis     |
| H59..          | Respiratory failure            | (ii) COPD symptom or diagnosis     |
| H590.          | Acute respiratory failure      | (ii) COPD symptom or diagnosis     |
| H591.          | Chronic respiratory failure    | (ii) COPD symptom or diagnosis     |
| H592.          | Chronic type 1 respir failure  | (ii) COPD symptom or diagnosis     |
| H593.          | Chronic type 2 respir failure  | (ii) COPD symptom or diagnosis     |
| Hyu0.          | [X]Ac upp respiratory infectns | (ii) COPD symptom or diagnosis     |
| Hyu04          | [X]Flu+o rsp manif             | (ii) COPD symptom or diagnosis     |
| Hyu05          | [X]Flu+o manifst               | (ii) COPD symptom or diagnosis     |
| Hyu06          | [X]Flu+o rsp manif             | (ii) COPD symptom or diagnosis     |
| Hyu07          | [X]Flu+o maniftns              | (ii) COPD symptom or diagnosis     |
| Hyu1.          | [X]Oth acute lowr resp infects | (ii) COPD symptom or diagnosis     |
| Hyu10          | [X]Ac bronchitis/o spcf orgnsm | (ii) COPD symptom or diagnosis     |
| Hyu11          | [X]Ac bronchltis/o spcf orgnsm | (ii) COPD symptom or diagnosis     |
| Hyu3.          | [X]Chron lowr respiratory dis  | (ii) COPD symptom or diagnosis     |
| Hyu30          | [X]Other emphysema             | (ii) COPD symptom or diagnosis     |
| Hyu31          | [X]O spcf chron obs pulmon dis | (ii) COPD symptom or diagnosis     |
| R06..          | [D]Respiratory/chest symptoms  | (ii) COPD symptom or diagnosis     |
| R0600          | [D]Respiratory symptom unspec. | (ii) COPD symptom or diagnosis     |
| R0601          | [D]Hyperventilation            | (ii) COPD symptom or diagnosis     |
| R0602          | [D]Orthopnoea                  | (ii) COPD symptom or diagnosis     |
| R0603          | [D]Tachypnoea                  | (ii) COPD symptom or diagnosis     |
| R0606          | [D]Respiratory distress        | (ii) COPD symptom or diagnosis     |
| R0607          | [D]Respiratory insufficiency   | (ii) COPD symptom or diagnosis     |
| R0608          | [D]Shortness of breath         | (ii) COPD symptom or diagnosis     |
| R0609          | [D]Wheezing                    | (ii) COPD symptom or diagnosis     |
| R060A          | [D]Dyspnoea                    | (ii) COPD symptom or diagnosis     |
| R060D          | [D]Breathlessness              | (ii) COPD symptom or diagnosis     |
| R060z          | [D]Respiratory abnormalit.NOS  | (ii) COPD symptom or diagnosis     |
| R062.          | [D]Cough                       | (ii) COPD symptom or diagnosis     |
| R063.          | [D]Haemoptysis                 | (ii) COPD symptom or diagnosis     |
| R0630          | [D]Cough with haemorrhage      | (ii) COPD symptom or diagnosis     |
| R063z          | [D]Haemoptysis NOS             | (ii) COPD symptom or diagnosis     |
| R064.          | [D]Abnormal sputum             | (ii) COPD symptom or diagnosis     |
| R0640          | [D]Sputum abnormal - amount    | (ii) COPD symptom or diagnosis     |
| R0641          | [D]Sputum abnormal - colour    | (ii) COPD symptom or diagnosis     |
| R0642          | [D]Sputum abnormal - odour     | (ii) COPD symptom or diagnosis     |
| R0643          | [D]Abnormal sputum - tenacious | (ii) COPD symptom or diagnosis     |
| R064z          | [D]Abnormal sputum NOS         | (ii) COPD symptom or diagnosis     |
| R0658          | [D]Chest tightness             | (ii) COPD symptom or diagnosis     |
| R06z.          | [D]Resp./chest symptoms-other  | (ii) COPD symptom or diagnosis     |
| R06zz          | [D]Resp./chest symptoms NOS    | (ii) COPD symptom or diagnosis     |
| R1531          | [D]Positive culture - sputum   | (ii) COPD symptom or diagnosis     |
| R2y1.          | [D]Respiratory failure         | (ii) COPD symptom or diagnosis     |
| R2y10          | [D]Cardiorespiratory failure   | (ii) COPD symptom or diagnosis     |
| R2y1z          | [D]Respiratory failure NOS     | (ii) COPD symptom or diagnosis     |
| SP132          | Post operative chest infection | (ii) COPD symptom or diagnosis     |
| AMCA123        | Amoxil Capsules 250 mg         | (ii) Respiratory antibiotic (EMIS) |
| AMCA124        | Amoxil Capsules 500 mg         | (ii) Respiratory antibiotic (EMIS) |
| AMCA141        | Ampicillin Capsules 250 mg     | (ii) Respiratory antibiotic (EMIS) |
| AMCA142        | Ampicillin Capsules 500 mg     | (ii) Respiratory antibiotic (EMIS) |
| AMCA17510NEMIS | Amoxicillin Capsules 250 mg    | (ii) Respiratory antibiotic (EMIS) |
| AMCA17511NEMIS | Amoxicillin Capsules 500 mg    | (ii) Respiratory antibiotic (EMIS) |
| AMCA9025BRIDL  | Amoram Capsules 250 mg         | (ii) Respiratory antibiotic (EMIS) |
| AMCA9027BRIDL  | Amoram Capsules 500 mg         | (ii) Respiratory antibiotic (EMIS) |

|                |                                                                          |                                    |
|----------------|--------------------------------------------------------------------------|------------------------------------|
| AMD1125        | Amoxil Dispersible tablets 500 mg                                        | (ii) Respiratory antibiotic (EMIS) |
| AMFI18005EMIS  | Amoxil Fiztabs 125 mg                                                    | (ii) Respiratory antibiotic (EMIS) |
| AMFI18006EMIS  | Amoxil Fiztabs 250 mg                                                    | (ii) Respiratory antibiotic (EMIS) |
| AMFI18007EMIS  | Amoxil Fiztabs 500 mg                                                    | (ii) Respiratory antibiotic (EMIS) |
| AMIN9033BRIDL  | Amoram Injection 250 mg/amp                                              | (ii) Respiratory antibiotic (EMIS) |
| AMIN9035BRIDL  | Amoram Injection 500 mg/amp                                              | (ii) Respiratory antibiotic (EMIS) |
| AMMI143        | Ampicillin Mixture 125 mg/5 ml                                           | (ii) Respiratory antibiotic (EMIS) |
| AMMI144        | Ampicillin Mixture 250 mg/5 ml                                           | (ii) Respiratory antibiotic (EMIS) |
| AMOR17515NEMIS | Amoxicillin Oral suspension 125 mg/5 ml                                  | (ii) Respiratory antibiotic (EMIS) |
| AMOR17516NEMIS | Amoxicillin Oral suspension 250 mg/5 ml                                  | (ii) Respiratory antibiotic (EMIS) |
| AMOR17518NEMIS | Amoxicillin Oral Powder Sachets Sugar Free 3 gram sachet                 | (ii) Respiratory antibiotic (EMIS) |
| AMOR17519NEMIS | Amoxicillin Oral Suspension Sugar Free 125 mg/5 ml                       | (ii) Respiratory antibiotic (EMIS) |
| AMOR17520NEMIS | Amoxicillin Oral Suspension Sugar Free 250 mg/5 ml                       | (ii) Respiratory antibiotic (EMIS) |
| AMPA129        | Amoxil Paediatric suspension 125 mg/1.25 ml                              | (ii) Respiratory antibiotic (EMIS) |
| AMPA17517NEMIS | Amoxicillin Paediatric oral suspension 125 mg/1.25 ml                    | (ii) Respiratory antibiotic (EMIS) |
| AMPA4595       | Ampicillin Paediatric suspension 125 mg/1.25 ml                          | (ii) Respiratory antibiotic (EMIS) |
| AMPA4596       | Ampicillin Paediatric tablets 125 mg                                     | (ii) Respiratory antibiotic (EMIS) |
| AMSA130        | Amoxil Sachets sf 3 gm                                                   | (ii) Respiratory antibiotic (EMIS) |
| AMSA131        | Amoxil Sachets sf 750 mg                                                 | (ii) Respiratory antibiotic (EMIS) |
| AMSY132        | Amoxil Syrup sf 125 mg/5 ml                                              | (ii) Respiratory antibiotic (EMIS) |
| AMSY133        | Amoxil Syrup sf 250 mg/5 ml                                              | (ii) Respiratory antibiotic (EMIS) |
| AMSY4597       | Ampicillin Syrup 125 mg/5 ml                                             | (ii) Respiratory antibiotic (EMIS) |
| AMSY4598       | Ampicillin Syrup forte 250 mg/5 ml                                       | (ii) Respiratory antibiotic (EMIS) |
| AMSY9029BRIDL  | Amoram Syrup 125 ml/5 ml                                                 | (ii) Respiratory antibiotic (EMIS) |
| AMSY9031BRIDL  | Amoram Syrup 250 mg/5 ml                                                 | (ii) Respiratory antibiotic (EMIS) |
| AUSU19802EMIS  | Augmentin 125/31 Sf Sugar free suspension 125 mg/5 ml + 31 mg/5 ml       | (ii) Respiratory antibiotic (EMIS) |
| AUSU19805EMIS  | Augmentin 250/62 Sf Sugar free suspension 250 mg/5 ml + 62 mg/5 ml       | (ii) Respiratory antibiotic (EMIS) |
| AUSU27887EMIS  | Augmentin-Duo 400/57 Sugar-free oral suspension 400 mg/5 ml + 57 mg/5 ml | (ii) Respiratory antibiotic (EMIS) |
| AUTA23527EMIS  | Augmentin 375 Mg Tablets                                                 | (ii) Respiratory antibiotic (EMIS) |
| AUTA23530EMIS  | Augmentin 625 Mg Tablets                                                 | (ii) Respiratory antibiotic (EMIS) |
| AUTA33618EMIS  | Augmentin 1 G Tablets                                                    | (ii) Respiratory antibiotic (EMIS) |
| AVTA15045NEMIS | Avelox Tablets 400 mg                                                    | (ii) Respiratory antibiotic (EMIS) |
| AZCA1005EMIS   | Azithromycin Capsules 250 mg                                             | (ii) Respiratory antibiotic (EMIS) |
| AZSU9381EMIS   | Azithromycin Suspension 200 mg/5 ml                                      | (ii) Respiratory antibiotic (EMIS) |
| AZTA23020NEMIS | Azithromycin Tablets 250 mg                                              | (ii) Respiratory antibiotic (EMIS) |
| AZTA34169EMIS  | Azithromycin Tablets 500 mg                                              | (ii) Respiratory antibiotic (EMIS) |
| CECA17567NEMIS | Cefalexin Capsules 250 mg                                                | (ii) Respiratory antibiotic (EMIS) |
| CECA17568NEMIS | Cefalexin Capsules 500 mg                                                | (ii) Respiratory antibiotic (EMIS) |
| CECA17575NEMIS | Cefradine Capsules 250 mg                                                | (ii) Respiratory antibiotic (EMIS) |
| CECA17576NEMIS | Cefradine Capsules 500 mg                                                | (ii) Respiratory antibiotic (EMIS) |
| CECA20695EMIS  | Cefaclor Capsules 500 mg                                                 | (ii) Respiratory antibiotic (EMIS) |
| CECA4686       | Cefaclor Capsules 250 mg                                                 | (ii) Respiratory antibiotic (EMIS) |
| CECA4688       | Cefadroxil Capsules 500 mg                                               | (ii) Respiratory antibiotic (EMIS) |
| CECA529        | Ceporex Capsules 250 mg                                                  | (ii) Respiratory antibiotic (EMIS) |
| CECA530        | Ceporex Capsules 500 mg                                                  | (ii) Respiratory antibiotic (EMIS) |
| CEM/22447EMIS  | Cefaclor M/R tablets 375 mg                                              | (ii) Respiratory antibiotic (EMIS) |
| CEM/27778EMIS  | Cefaclor M/R tablets 500 mg                                              | (ii) Respiratory antibiotic (EMIS) |
| CEOR17571NEMIS | Cefalexin Oral suspension 125 mg/5 ml                                    | (ii) Respiratory antibiotic (EMIS) |
| CEOR17572NEMIS | Cefalexin Oral suspension 250 mg/5 ml                                    | (ii) Respiratory antibiotic (EMIS) |
| CEOR17573NEMIS | Cefalexin Oral suspension 500 mg/5 ml                                    | (ii) Respiratory antibiotic (EMIS) |
| CEOR17579NEMIS | Cefradine Oral solution 250 mg/5 ml                                      | (ii) Respiratory antibiotic (EMIS) |
| CEOR28319NEMIS | Cefalexin Oral Suspension (Sugar-Free) 250 mg/5 ml                       | (ii) Respiratory antibiotic (EMIS) |
| CEOR44053NEMIS | Cefalexin 125mg/5ml oral suspension sugar free                           | (ii) Respiratory antibiotic (EMIS) |
| CEOR44053NEMIS | Cefalexin Oral Suspension (Sugar-Free) 125 mg/5 ml                       | (ii) Respiratory antibiotic (EMIS) |
| CEPA27534EMIS  | Cefpodoxime Proxetil Paediatric suspension 40 mg/5 ml                    | (ii) Respiratory antibiotic (EMIS) |
| CEPA531        | Ceporex Paediatric drops 125 mg/1.25 ml                                  | (ii) Respiratory antibiotic (EMIS) |
| CESA20465EMIS  | Cefuroxime Axetil Sachets 125 mg/sachet                                  | (ii) Respiratory antibiotic (EMIS) |
| CESU10328HILLI | Cefixime Paediatric suspension 100 mg/5 ml                               | (ii) Respiratory antibiotic (EMIS) |

|                |                                                              |                                    |
|----------------|--------------------------------------------------------------|------------------------------------|
| CESU18066EMIS  | Cefuroxime Axetil Suspension 125 mg/5 ml                     | (ii) Respiratory antibiotic (EMIS) |
| CESU31410EMIS  | Cefaclor Sugar-free suspension 125 mg/5 ml                   | (ii) Respiratory antibiotic (EMIS) |
| CESU31411EMIS  | Cefaclor Sugar-free suspension 250 mg/5 ml                   | (ii) Respiratory antibiotic (EMIS) |
| CESU4687       | Cefaclor Suspension 125 mg/5 ml                              | (ii) Respiratory antibiotic (EMIS) |
| CESU4689       | Cefadroxil Suspension 125 mg/5 ml                            | (ii) Respiratory antibiotic (EMIS) |
| CESU532        | Ceporex Suspension 125 mg/5 ml                               | (ii) Respiratory antibiotic (EMIS) |
| CESU533        | Ceporex Suspension 250 mg/5 ml                               | (ii) Respiratory antibiotic (EMIS) |
| CESU6799       | Cefadroxil Suspension 250 mg/5 ml                            | (ii) Respiratory antibiotic (EMIS) |
| CESU6800       | Cefadroxil Suspension 500 mg/5 ml                            | (ii) Respiratory antibiotic (EMIS) |
| CESU6870       | Cefaclor Suspension 250 mg/5 ml                              | (ii) Respiratory antibiotic (EMIS) |
| CESY534        | Ceporex Syrup 125 mg/5 ml                                    | (ii) Respiratory antibiotic (EMIS) |
| CESY535        | Ceporex Syrup 250 mg/5 ml                                    | (ii) Respiratory antibiotic (EMIS) |
| CESY536        | Ceporex Syrup 500 mg/5 ml                                    | (ii) Respiratory antibiotic (EMIS) |
| CETA10329HILLI | Cefixime Tablets 200 mg                                      | (ii) Respiratory antibiotic (EMIS) |
| CETA10999BRIDL | Cefuroxime Tablets 250 mg                                    | (ii) Respiratory antibiotic (EMIS) |
| CETA14215NEMIS | Cefuroxime Tablets 500 mg                                    | (ii) Respiratory antibiotic (EMIS) |
| CETA17569NEMIS | Cefalexin Tablets 250 mg                                     | (ii) Respiratory antibiotic (EMIS) |
| CETA17570NEMIS | Cefalexin Tablets 500 mg                                     | (ii) Respiratory antibiotic (EMIS) |
| CETA22410EMIS  | Cefpodoxime Proxetil Tablets 100 mg                          | (ii) Respiratory antibiotic (EMIS) |
| CETA537        | Ceporex Tablets 250 mg                                       | (ii) Respiratory antibiotic (EMIS) |
| CETA538        | Ceporex Tablets 500 mg                                       | (ii) Respiratory antibiotic (EMIS) |
| CETA7121       | Cefuroxime Tablets 125 mg                                    | (ii) Respiratory antibiotic (EMIS) |
| CETA9505BRIDL  | Ceporex Tablets 1g                                           | (ii) Respiratory antibiotic (EMIS) |
| CHCA602        | Chlortetracycline Hydrochloride Capsules 250 mg              | (ii) Respiratory antibiotic (EMIS) |
| CISU32102EMIS  | Ciproxin Suspension 250 mg/5 ml                              | (ii) Respiratory antibiotic (EMIS) |
| CISU32104EMIS  | Ciprofloxacin Suspension 250 mg/5 ml                         | (ii) Respiratory antibiotic (EMIS) |
| CITA22180EMIS  | Ciproxin Tablets 500 mg                                      | (ii) Respiratory antibiotic (EMIS) |
| CITA22182EMIS  | Ciprofloxacin Tablets 500 mg                                 | (ii) Respiratory antibiotic (EMIS) |
| CITA23557EMIS  | Ciproxin Tablets 750 mg                                      | (ii) Respiratory antibiotic (EMIS) |
| CITA23848EMIS  | Ciprofloxacin Tablets 750 mg                                 | (ii) Respiratory antibiotic (EMIS) |
| CITA31080EMIS  | Ciprofloxacin Tablets 100 mg                                 | (ii) Respiratory antibiotic (EMIS) |
| CITA31082EMIS  | Ciproxin Tablets 100 mg                                      | (ii) Respiratory antibiotic (EMIS) |
| CITA5645       | Ciproxin Tablets 250 mg                                      | (ii) Respiratory antibiotic (EMIS) |
| CITA6845       | Ciprofloxacin Tablets 250 mg                                 | (ii) Respiratory antibiotic (EMIS) |
| CLGR21384NEMIS | Clarithromycin Granules For Oral Suspension Straws 125 mg    | (ii) Respiratory antibiotic (EMIS) |
| CLGR21385NEMIS | Clarithromycin Granules For Oral Suspension Straws 187.5 mg  | (ii) Respiratory antibiotic (EMIS) |
| CLGR21386NEMIS | Clarithromycin Granules For Oral Suspension Straws 250 mg    | (ii) Respiratory antibiotic (EMIS) |
| CLM/30085EMIS  | Clarithromycin M/R tablets 500 mg                            | (ii) Respiratory antibiotic (EMIS) |
| CLPA22477EMIS  | Clarithromycin Paediatric suspension 125 mg/5 ml             | (ii) Respiratory antibiotic (EMIS) |
| CLPA770NEMIS   | Clarithromycin Paediatric suspension 250 mg/5 ml             | (ii) Respiratory antibiotic (EMIS) |
| CLSA31718EMIS  | Clarithromycin Sachets 250 mg/sachet                         | (ii) Respiratory antibiotic (EMIS) |
| CLTA26172EMIS  | Clarithromycin Tablets 500 mg                                | (ii) Respiratory antibiotic (EMIS) |
| CLTA9105EMIS   | Clarithromycin Tablets 250 mg                                | (ii) Respiratory antibiotic (EMIS) |
| COAD4763       | Co-Trimoxazole Adult suspension 480 mg/5 ml                  | (ii) Respiratory antibiotic (EMIS) |
| COAD689        | Co-Trimoxazole Mixture 480 mg/5 ml                           | (ii) Respiratory antibiotic (EMIS) |
| CODI29221EMIS  | Co-Amoxiclav 250/125 Dispersible tablets Sugar Free          | (ii) Respiratory antibiotic (EMIS) |
| CODI690        | Co-Trimoxazole Dispersible tablets 480 mg                    | (ii) Respiratory antibiotic (EMIS) |
| CODR4764       | Co-Trimoxazole Drapsules 480 mg                              | (ii) Respiratory antibiotic (EMIS) |
| COFO4765       | Co-Trimoxazole Forte tablets dispersible 960 mg              | (ii) Respiratory antibiotic (EMIS) |
| COFO691        | Co-Trimoxazole Tablets 960 mg                                | (ii) Respiratory antibiotic (EMIS) |
| COOR43494NEMIS | Co-amoxiclav 125mg/31mg/5ml oral suspension                  | (ii) Respiratory antibiotic (EMIS) |
| COOR43494NEMIS | Co-Amoxiclav 125/31 Oral suspension 125 mg/5 ml + 31 mg/5 ml | (ii) Respiratory antibiotic (EMIS) |
| COOR43495NEMIS | Co-Amoxiclav 250/62 Oral Suspension 250 mg/5 ml + 62 mg/5 ml | (ii) Respiratory antibiotic (EMIS) |
| COOR43495NEMIS | Co-amoxiclav 250mg/62mg/5ml oral suspension                  | (ii) Respiratory antibiotic (EMIS) |
| COPA10270BRIDL | Co-Trimoxazole Paediatric s/f dispersible tablets 120 mg     | (ii) Respiratory antibiotic (EMIS) |
| COPA3325       | Co-Trimoxazole Paediatric mixture 240 mg/5 ml                | (ii) Respiratory antibiotic (EMIS) |
| COPA4767       | Co-Trimoxazole Paediatric suspension 240 mg/5 ml             | (ii) Respiratory antibiotic (EMIS) |
| COPA695        | Co-Trimoxazole Paediatric tablets 120 mg                     | (ii) Respiratory antibiotic (EMIS) |



|                |                                                                         |                                       |
|----------------|-------------------------------------------------------------------------|---------------------------------------|
| COSO3326       | Co-Trimoxazole Solution 96 mg/ml                                        | (ii) Respiratory antibiotic (EMIS)    |
| COSU10268BRIDL | Co-Trimoxazole Sugar free paediatric syrup 240 mg/5 ml                  | (ii) Respiratory antibiotic (EMIS)    |
| COSU19812EMIS  | Co-Amoxiclav 125/31 Sugar free suspension 125 mg/5 ml + 31 mg/5 ml      | (ii) Respiratory antibiotic (EMIS)    |
| COSU19815EMIS  | Co-Amoxiclav 250/62 Sugar free suspension 250 mg/5 ml + 62 mg/5 ml      | (ii) Respiratory antibiotic (EMIS)    |
| COSU27890EMIS  | Co-Amoxiclav 400/57 Sugar-free oral suspension 400 mg/5 ml + 57 mg/5 ml | (ii) Respiratory antibiotic (EMIS)    |
| COTA23533EMIS  | Co-Amoxiclav 250/125 Tablets                                            | (ii) Respiratory antibiotic (EMIS)    |
| COTA23536EMIS  | Co-Amoxiclav 500/125 Tablets                                            | (ii) Respiratory antibiotic (EMIS)    |
| COTA33621EMIS  | Co-Amoxiclav 875/125 Tablets                                            | (ii) Respiratory antibiotic (EMIS)    |
| COTA4768       | Co-Trimoxazole Tablets forte 960 mg                                     | (ii) Respiratory antibiotic (EMIS)    |
| COTA696        | Co-Trimoxazole Tablets 480 mg                                           | (ii) Respiratory antibiotic (EMIS)    |
| COTA697        | Co-Trimoxazole Tablets 960 mg                                           | (ii) Respiratory antibiotic (EMIS)    |
| DECA4806       | Demeclocycline Hydrochloride Capsules 150 mg                            | (ii) Respiratory antibiotic (EMIS)    |
| DETA4807       | Demeclocycline Hydrochloride Tablets 300 mg                             | (ii) Respiratory antibiotic (EMIS)    |
| DICA20697EMIS  | Distaclor Capsules 500 mg                                               | (ii) Respiratory antibiotic (EMIS)    |
| DICA940        | Distaclor Capsules 250 mg                                               | (ii) Respiratory antibiotic (EMIS)    |
| DIM/22445EMIS  | Distaclor Mr M/R tablets 375 mg                                         | (ii) Respiratory antibiotic (EMIS)    |
| DIM/27776EMIS  | Distaclor Mr M/R tablets 500 mg                                         | (ii) Respiratory antibiotic (EMIS)    |
| DISU941        | Distaclor Suspension 125 mg/5 ml                                        | (ii) Respiratory antibiotic (EMIS)    |
| DISU942        | Distaclor Suspension 250 mg/5 ml                                        | (ii) Respiratory antibiotic (EMIS)    |
| DOCA17639EMIS  | Doxycycline Hyclate Capsules 100 mg                                     | (ii) Respiratory antibiotic (EMIS)    |
| DOCA32449EMIS  | Doxycycline Hyclate Capsules 50 mg                                      | (ii) Respiratory antibiotic (EMIS)    |
| DOCA4868       | Doxycycline Capsules 100 mg                                             | (ii) Respiratory antibiotic (EMIS)    |
| DOCA7112       | Doxycycline Capsules 50 mg                                              | (ii) Respiratory antibiotic (EMIS)    |
| DODI17640EMIS  | Doxycycline Hyclate Dispersible tablets 100 mg                          | (ii) Respiratory antibiotic (EMIS)    |
| DODI4869       | Doxycycline Dispersible tablets 100 mg                                  | (ii) Respiratory antibiotic (EMIS)    |
| DOM/37467EMIS  | Doxycycline Monohydrate M/R Capsules 40 mg                              | (ii) Respiratory antibiotic (EMIS)    |
| DOM/37467EMIS  | Doxycycline 40mg modified-release capsules                              | (ii) Respiratory antibiotic (EMIS)    |
| DOOR74087EMIS  | Doxycycline 50mg/5ml oral suspension                                    | (ii) Respiratory antibiotic (EMIS)    |
| DOOR74087EMIS  | Doxycycline Oral Suspension 50 mg/5 ml                                  | (ii) Respiratory antibiotic (EMIS)    |
| DOSY4870       | Doxycycline Syrup 50 mg/5 ml                                            | (ii) Respiratory antibiotic (EMIS)    |
| DOTA983        | Doxycycline Tablets 100 mg                                              | (ii) Respiratory antibiotic (EMIS)    |
| e311.          | AMOXICILLIN 250mg capsules                                              | (ii) Respiratory antibiotic (Read v2) |
| e312.          | AMOXICILLIN 500mg capsules                                              | (ii) Respiratory antibiotic (Read v2) |
| e315.          | AMOXIL 250mg capsules                                                   | (ii) Respiratory antibiotic (Read v2) |
| e316.          | AMOXIL 500mg capsules                                                   | (ii) Respiratory antibiotic (Read v2) |
| e317.          | AMOXIL 500mg disp tabs                                                  | (ii) Respiratory antibiotic (Read v2) |
| e318.          | AMOXIL 125mg/5mL syrup                                                  | (ii) Respiratory antibiotic (Read v2) |
| e319.          | AMOXIL SF 125mg/5mL syrup                                               | (ii) Respiratory antibiotic (Read v2) |
| e31a.          | AMOXIL SF 250mg/5mL syrup                                               | (ii) Respiratory antibiotic (Read v2) |
| e31b.          | AMOXIL 125mg/1.25mL suspension                                          | (ii) Respiratory antibiotic (Read v2) |
| e31c.          | AMOXIL SF 750mg sachets                                                 | (ii) Respiratory antibiotic (Read v2) |
| e31d.          | AMOXIL SF 3g sachets                                                    | (ii) Respiratory antibiotic (Read v2) |
| e31h.          | AUGMENTIN 375mg tablets                                                 | (ii) Respiratory antibiotic (Read v2) |
| e31i.          | AUGMENTIN 375mg disp tabs                                               | (ii) Respiratory antibiotic (Read v2) |
| e31j.          | AUGMENTIN JUNIOR 125/62 in 5mL suspension                               | (ii) Respiratory antibiotic (Read v2) |
| e31k.          | AUGMENTIN 125/31 in 5mL suspension                                      | (ii) Respiratory antibiotic (Read v2) |
| e31M.          | AMOXIL FIZTAB 125mg chew tabs                                           | (ii) Respiratory antibiotic (Read v2) |
| e31N.          | AMOXIL FIZTAB 250mg chew tabs                                           | (ii) Respiratory antibiotic (Read v2) |
| e31O.          | AMOXIL FIZTAB 500mg chew tabs                                           | (ii) Respiratory antibiotic (Read v2) |
| e31P.          | AUGMENTIN 250/62 in 5mL suspension                                      | (ii) Respiratory antibiotic (Read v2) |
| e31Q.          | CO-AMOXICLAV 125/31mg in 5mL suspension                                 | (ii) Respiratory antibiotic (Read v2) |
| e31t.          | CO-AMOXICLAV 375mg tablets                                              | (ii) Respiratory antibiotic (Read v2) |
| e31T.          | AUGMENTIN 625mg tablets                                                 | (ii) Respiratory antibiotic (Read v2) |
| e31u.          | CO-AMOXICLAV 375mg disp tabs                                            | (ii) Respiratory antibiotic (Read v2) |
| e31U.          | CO-AMOXICLAV 625mg tablets                                              | (ii) Respiratory antibiotic (Read v2) |
| e31v.          | CO-AMOXICLAV 125mg/5mL suspension                                       | (ii) Respiratory antibiotic (Read v2) |
| e31w.          | CO-AMOXICLAV 125mg/mL suspension                                        | (ii) Respiratory antibiotic (Read v2) |
| e31X.          | CO-AMOXICLAV 400/57mg in 5mL s/f susp                                   | (ii) Respiratory antibiotic (Read v2) |

|       |                                       |                                       |
|-------|---------------------------------------|---------------------------------------|
| e31Y. | AUGMENTIN-DUO 400/57 in 5mL s/f susp  | (ii) Respiratory antibiotic (Read v2) |
| e31z. | CO-AMOXICLAV 250/62 in 5mL suspension | (ii) Respiratory antibiotic (Read v2) |
| e321. | AMPICILLIN 250mg capsules             | (ii) Respiratory antibiotic (Read v2) |
| e322. | AMPICILLIN 500mg capsules             | (ii) Respiratory antibiotic (Read v2) |
| e323. | AMPICILLIN 125mg/5mL mixture          | (ii) Respiratory antibiotic (Read v2) |
| e324. | AMPICILLIN 250mg/5mL mixture          | (ii) Respiratory antibiotic (Read v2) |
| e32G. | AMPICILLIN 125mg/1.25mL suspension    | (ii) Respiratory antibiotic (Read v2) |
| e32h. | PENBRITIN 250mg capsules              | (ii) Respiratory antibiotic (Read v2) |
| e32H. | AMPICILLIN 125mg/5mL s/f susp         | (ii) Respiratory antibiotic (Read v2) |
| e32i. | PENBRITIN 500mg capsules              | (ii) Respiratory antibiotic (Read v2) |
| e32j. | PENBRITIN 125mg tablets               | (ii) Respiratory antibiotic (Read v2) |
| e32J. | AMPICILLIN 250mg/5mL s/f susp         | (ii) Respiratory antibiotic (Read v2) |
| e32k. | PENBRITIN 125mg/5mL syrup             | (ii) Respiratory antibiotic (Read v2) |
| e32l. | PENBRITIN 250mg/5mL syrup             | (ii) Respiratory antibiotic (Read v2) |
| e32m. | PENBRITIN 100mg/mL suspension         | (ii) Respiratory antibiotic (Read v2) |
| e32z. | AMPICILLIN 125mg tablets              | (ii) Respiratory antibiotic (Read v2) |
| e3z1. | AMORAM 250mg capsules                 | (ii) Respiratory antibiotic (Read v2) |
| e3z2. | AMORAM 500mg capsules                 | (ii) Respiratory antibiotic (Read v2) |
| e3z3. | AMORAM 125mg/5mL suspension           | (ii) Respiratory antibiotic (Read v2) |
| e3z4. | AMORAM 250mg/5mL suspension           | (ii) Respiratory antibiotic (Read v2) |
| e3z7. | GALENAMOX 250mg capsules              | (ii) Respiratory antibiotic (Read v2) |
| e3z8. | GALENAMOX 500mg capsules              | (ii) Respiratory antibiotic (Read v2) |
| e3z9. | GALENAMOX 125mg/5mL suspension        | (ii) Respiratory antibiotic (Read v2) |
| e3za. | GALENAMOX 250mg/5mL suspension        | (ii) Respiratory antibiotic (Read v2) |
| e3zA. | GALENAMOX TP 250mg capsules           | (ii) Respiratory antibiotic (Read v2) |
| e3zb. | GALENAMOX 125mg/5mL s/f susp          | (ii) Respiratory antibiotic (Read v2) |
| e3zB. | GALENAMOX TP 500mg capsules           | (ii) Respiratory antibiotic (Read v2) |
| e3zc. | GALENAMOX 250mg/5mL s/f susp          | (ii) Respiratory antibiotic (Read v2) |
| e3zE. | AMOXICILLIN 125mg/sachet s/f pdr      | (ii) Respiratory antibiotic (Read v2) |
| e3zf. | RIMOXALLIN 125mg/5mL syrup            | (ii) Respiratory antibiotic (Read v2) |
| e3zF. | AMOXIDENT 250mg capsules              | (ii) Respiratory antibiotic (Read v2) |
| e3zg. | RIMOXALLIN 250mg capsules             | (ii) Respiratory antibiotic (Read v2) |
| e3zG. | AMOXIDENT 500mg capsules              | (ii) Respiratory antibiotic (Read v2) |
| e3zh. | RIMOXALLIN 500mg capsules             | (ii) Respiratory antibiotic (Read v2) |
| e3zj. | RIMOXALLIN 250mg/5mL syrup            | (ii) Respiratory antibiotic (Read v2) |
| e3zk. | AMOXICILLIN 125mg/5mL s/f susp        | (ii) Respiratory antibiotic (Read v2) |
| e3zm. | AMOXICILLIN 125mg/5mL syrup           | (ii) Respiratory antibiotic (Read v2) |
| e3zn. | AMOXICILLIN 250mg/5mL syrup           | (ii) Respiratory antibiotic (Read v2) |
| e3zo. | AMOXICILLIN 125mg/1.25mL suspension   | (ii) Respiratory antibiotic (Read v2) |
| e3zu. | AMOXICILLIN 250mg/5mL s/f susp        | (ii) Respiratory antibiotic (Read v2) |
| e611. | DISTACLOR 250mg capsules              | (ii) Respiratory antibiotic (Read v2) |
| e612. | DISTACLOR 125mg/5mL suspension        | (ii) Respiratory antibiotic (Read v2) |
| e613. | DISTACLOR 250mg/5mL suspension        | (ii) Respiratory antibiotic (Read v2) |
| e614. | CEFACLOR 250mg capsules               | (ii) Respiratory antibiotic (Read v2) |
| e615. | CEFACLOR 125mg/5mL suspension         | (ii) Respiratory antibiotic (Read v2) |
| e616. | CEFACLOR 250mg/5mL suspension         | (ii) Respiratory antibiotic (Read v2) |
| e617. | DISTACLOR 500mg capsules              | (ii) Respiratory antibiotic (Read v2) |
| e618. | CEFACLOR 500mg capsules               | (ii) Respiratory antibiotic (Read v2) |
| e619. | DISTACLOR MR 375mg m/r tabs           | (ii) Respiratory antibiotic (Read v2) |
| e61a. | CEFACLOR 375mg m/r tabs               | (ii) Respiratory antibiotic (Read v2) |
| e61b. | DISTACLOR MR 500mg m/r tabs           | (ii) Respiratory antibiotic (Read v2) |
| e61c. | CEFACLOR 500mg m/r tabs               | (ii) Respiratory antibiotic (Read v2) |
| e61C. | CEFACLOR 125mg/5mL s/f susp           | (ii) Respiratory antibiotic (Read v2) |
| e61D. | CEFACLOR 250mg/5mL s/f susp           | (ii) Respiratory antibiotic (Read v2) |
| e625. | CEFADROXIL 125mg/5mL suspension       | (ii) Respiratory antibiotic (Read v2) |
| e626. | CEFADROXIL 250mg/5mL suspension       | (ii) Respiratory antibiotic (Read v2) |
| e627. | CEFADROXIL 500mg capsules             | (ii) Respiratory antibiotic (Read v2) |
| e62w. | CEFADROXIL 500mg capsules             | (ii) Respiratory antibiotic (Read v2) |

|       |                                     |                                       |
|-------|-------------------------------------|---------------------------------------|
| e62x. | CEFADROXIL 500mg capsules           | (ii) Respiratory antibiotic (Read v2) |
| e62z. | CEFADROXIL 500mg/5mL suspension     | (ii) Respiratory antibiotic (Read v2) |
| e684. | ZINNAT 125mg tablets                | (ii) Respiratory antibiotic (Read v2) |
| e685. | ZINNAT 250mg tablets                | (ii) Respiratory antibiotic (Read v2) |
| e686. | CEFUROXIME 125mg tablets            | (ii) Respiratory antibiotic (Read v2) |
| e687. | CEFUROXIME 250mg tablets            | (ii) Respiratory antibiotic (Read v2) |
| e689. | ZINNAT 125mg/5mL suspension         | (ii) Respiratory antibiotic (Read v2) |
| e68a. | CEFUROXIME 125mg/5mL suspension     | (ii) Respiratory antibiotic (Read v2) |
| e68b. | ZINNAT 125mg/sachet suspension      | (ii) Respiratory antibiotic (Read v2) |
| e68c. | CEFUROXIME 125mg/sach for susp      | (ii) Respiratory antibiotic (Read v2) |
| e691. | CEFALEXIN 250mg capsules            | (ii) Respiratory antibiotic (Read v2) |
| e692. | CEFALEXIN 500mg capsules            | (ii) Respiratory antibiotic (Read v2) |
| e693. | CEFALEXIN 250mg tablets             | (ii) Respiratory antibiotic (Read v2) |
| e694. | CEFALEXIN 500mg tablets             | (ii) Respiratory antibiotic (Read v2) |
| e695. | CEFALEXIN 125mg/5mL mixture         | (ii) Respiratory antibiotic (Read v2) |
| e696. | CEFALEXIN 250mg/5mL mixture         | (ii) Respiratory antibiotic (Read v2) |
| e697. | CEFALEXIN 500mg/5mL syrup           | (ii) Respiratory antibiotic (Read v2) |
| e698. | CEPOREX 250mg capsules              | (ii) Respiratory antibiotic (Read v2) |
| e699. | CEPOREX 500mg capsules              | (ii) Respiratory antibiotic (Read v2) |
| e69a. | CEPOREX 250mg tablets               | (ii) Respiratory antibiotic (Read v2) |
| e69b. | CEPOREX 500mg tablets               | (ii) Respiratory antibiotic (Read v2) |
| e69c. | CEPOREX 125mg/1.25mL drops          | (ii) Respiratory antibiotic (Read v2) |
| e69d. | CEPOREX 125mg/5mL suspension        | (ii) Respiratory antibiotic (Read v2) |
| e69e. | CEPOREX 250mg/5mL suspension        | (ii) Respiratory antibiotic (Read v2) |
| e69f. | CEPOREX 125mg/5mL syrup             | (ii) Respiratory antibiotic (Read v2) |
| e69g. | CEPOREX 250mg/5mL syrup             | (ii) Respiratory antibiotic (Read v2) |
| e69h. | CEPOREX 500mg/5mL syrup             | (ii) Respiratory antibiotic (Read v2) |
| e69i. | KEFLEX 250mg capsules               | (ii) Respiratory antibiotic (Read v2) |
| e69j. | KEFLEX 500mg capsules               | (ii) Respiratory antibiotic (Read v2) |
| e69k. | KEFLEX 250mg tablets                | (ii) Respiratory antibiotic (Read v2) |
| e69l. | KEFLEX 500mg tablets                | (ii) Respiratory antibiotic (Read v2) |
| e69m. | KEFLEX 125mg/5mL suspension         | (ii) Respiratory antibiotic (Read v2) |
| e69n. | KEFLEX 250mg/5mL suspension         | (ii) Respiratory antibiotic (Read v2) |
| e69o. | KEFLEX-C 125mg chew tabs            | (ii) Respiratory antibiotic (Read v2) |
| e69p. | KEFLEX-C 250mg chew tabs            | (ii) Respiratory antibiotic (Read v2) |
| e69q. | CEPOREX 1g tablets                  | (ii) Respiratory antibiotic (Read v2) |
| e69v. | CEFALEXIN 125mg/5mL syrup           | (ii) Respiratory antibiotic (Read v2) |
| e69w. | CEFALEXIN 250mg/5mL syrup           | (ii) Respiratory antibiotic (Read v2) |
| e6dv. | CEFRADINE 250mg capsules            | (ii) Respiratory antibiotic (Read v2) |
| e6dw. | CEFRADINE 500mg capsules            | (ii) Respiratory antibiotic (Read v2) |
| e6dx. | CEFRADINE 250mg/5mL syrup           | (ii) Respiratory antibiotic (Read v2) |
| e6h1. | CEFIXIME 200mg tablets              | (ii) Respiratory antibiotic (Read v2) |
| e6h2. | CEFIXIME 100mg/5mL suspension       | (ii) Respiratory antibiotic (Read v2) |
| e6h3. | SUPRAX 200mg tablets                | (ii) Respiratory antibiotic (Read v2) |
| e6h4. | SUPRAX 100mg/5mL suspension         | (ii) Respiratory antibiotic (Read v2) |
| e6h5. | SUPRAX 100mg/5mL suspension         | (ii) Respiratory antibiotic (Read v2) |
| e6h6. | SUPRAX 100mg/5mL suspension         | (ii) Respiratory antibiotic (Read v2) |
| e6h7. | SUPRAX 100mg/5mL suspension         | (ii) Respiratory antibiotic (Read v2) |
| e6k0. | CEFPODOXIME 100mg tablets           | (ii) Respiratory antibiotic (Read v2) |
| e6k2. | CEFPODOXIME 40mg/5mL suspension     | (ii) Respiratory antibiotic (Read v2) |
| e711. | TETRACYCLINE 250mg capsules         | (ii) Respiratory antibiotic (Read v2) |
| e712. | TETRACYCLINE 250mg tablets          | (ii) Respiratory antibiotic (Read v2) |
| e713. | TETRACYCLINE 125mg/5mL mixture      | (ii) Respiratory antibiotic (Read v2) |
| e71p. | TETRACYCLINE 250mg m/r caps         | (ii) Respiratory antibiotic (Read v2) |
| e71z. | COMPOUND TETRACYCLINE 300mg tablets | (ii) Respiratory antibiotic (Read v2) |
| e72y. | CHLORTETRACYCLINE 250mg capsules    | (ii) Respiratory antibiotic (Read v2) |
| e74y. | DEMECLOCYCLINE HCL 150mg capsules   | (ii) Respiratory antibiotic (Read v2) |
| e74z. | DEMECLOCYCLINE HCL 300mg tablets    | (ii) Respiratory antibiotic (Read v2) |

|       |                                           |                                       |
|-------|-------------------------------------------|---------------------------------------|
| e754. | VIBRAMYCIN 50mg capsules                  | (ii) Respiratory antibiotic (Read v2) |
| e755. | VIBRAMYCIN 100mg capsules                 | (ii) Respiratory antibiotic (Read v2) |
| e756. | VIBRAMYCIN 50mg/5mL syrup                 | (ii) Respiratory antibiotic (Read v2) |
| e757. | VIBRAMYCIN-D 100mg disp tabs              | (ii) Respiratory antibiotic (Read v2) |
| e758. | DOXYCYCLINE 100mg capsules                | (ii) Respiratory antibiotic (Read v2) |
| e75s. | DOXYCYCLINE 40mg m/r caps                 | (ii) Respiratory antibiotic (Read v2) |
| e75v. | DOXYCYCLINE 100mg tablets                 | (ii) Respiratory antibiotic (Read v2) |
| e75w. | DOXYCYCLINE 100mg capsules                | (ii) Respiratory antibiotic (Read v2) |
| e75x. | DOXYCYCLINE 50mg capsules                 | (ii) Respiratory antibiotic (Read v2) |
| e75y. | DOXYCYCLINE 50mg/5mL syrup                | (ii) Respiratory antibiotic (Read v2) |
| e75z. | DOXYCYCLINE 100mg disp tabs               | (ii) Respiratory antibiotic (Read v2) |
| e761. | TETRALYSAL 204mg capsules                 | (ii) Respiratory antibiotic (Read v2) |
| e762. | TETRALYSAL-300 408mg capsules             | (ii) Respiratory antibiotic (Read v2) |
| e76y. | LYMECYCLINE 204mg capsules                | (ii) Respiratory antibiotic (Read v2) |
| e76z. | LYMECYCLINE 408mg capsules                | (ii) Respiratory antibiotic (Read v2) |
| e781. | OXYTETRACYCLINE 250mg capsules            | (ii) Respiratory antibiotic (Read v2) |
| e782. | OXYTETRACYCLINE 250mg tablets             | (ii) Respiratory antibiotic (Read v2) |
| e783. | OXYTETRACYCLINE 125mg/5mL mixture         | (ii) Respiratory antibiotic (Read v2) |
| e789. | OXYMYCIN 250mg tablets                    | (ii) Respiratory antibiotic (Read v2) |
| e78y. | OXYTETRACYCLINE 125mg/5mL syrup           | (ii) Respiratory antibiotic (Read v2) |
| e79z. | TETRACYCLINE+NYSTATIN 250mg/250ku tablets | (ii) Respiratory antibiotic (Read v2) |
| e911. | ERYTHROMYCIN 250mg e/c tabs               | (ii) Respiratory antibiotic (Read v2) |
| e912. | ERYTHROMYCIN 500mg tablets                | (ii) Respiratory antibiotic (Read v2) |
| e913. | ERYTHROMYCIN STEARATE 250mg tablets       | (ii) Respiratory antibiotic (Read v2) |
| e914. | ERYTHROMYCIN STEARATE 500mg tablets       | (ii) Respiratory antibiotic (Read v2) |
| e91a. | ERYMAX 250mg e/c grans                    | (ii) Respiratory antibiotic (Read v2) |
| e91A. | ERYTHROPEL FORTE grans                    | (ii) Respiratory antibiotic (Read v2) |
| e91b. | ERYTHROCIN 250mg tablets                  | (ii) Respiratory antibiotic (Read v2) |
| e91B. | ERYTHROPEL P.I. grans                     | (ii) Respiratory antibiotic (Read v2) |
| e91c. | ERYTHROCIN 500mg tablets                  | (ii) Respiratory antibiotic (Read v2) |
| e91C. | ERYTHROPEL P.I. 125mg/5mL s/f susp        | (ii) Respiratory antibiotic (Read v2) |
| e91D. | ERYTHROPEL 250mg/5ml s/f susp             | (ii) Respiratory antibiotic (Read v2) |
| e91E. | ERYTHROMYCIN 125mg/5mL s/f susp           | (ii) Respiratory antibiotic (Read v2) |
| e91F. | ERYTHROMYCIN 250mg/5mL s/f susp           | (ii) Respiratory antibiotic (Read v2) |
| e91I. | KERYMAX 250mg e/c grans                   | (ii) Respiratory antibiotic (Read v2) |
| e91j. | ERYTHROPEL P.I. 125mg/5mL suspension      | (ii) Respiratory antibiotic (Read v2) |
| e91k. | ERYTHROPEL 250mg/5mL suspension           | (ii) Respiratory antibiotic (Read v2) |
| e91L. | ERYTHROPEL 250mg/sachet s/f grans         | (ii) Respiratory antibiotic (Read v2) |
| e91L. | ERYTHROMYCIN 250mg capsules               | (ii) Respiratory antibiotic (Read v2) |
| e91m. | ERYTHROPEL FORTE 500mg/5mL suspension     | (ii) Respiratory antibiotic (Read v2) |
| e91M. | ERYTHROMYCIN 125mg/sachet grans           | (ii) Respiratory antibiotic (Read v2) |
| e91n. | ERYTHROPEL A 500mg tablets                | (ii) Respiratory antibiotic (Read v2) |
| e91N. | ERYTHROMYCIN 250mg/sachet grans           | (ii) Respiratory antibiotic (Read v2) |
| e91P. | ERYTHROMYCIN 500mg/sachet grans           | (ii) Respiratory antibiotic (Read v2) |
| e91Q. | ERYTHROMYCIN 1g/sachet grans              | (ii) Respiratory antibiotic (Read v2) |
| e91R. | ERYTHROMYCIN 500mg/5mL s/f susp           | (ii) Respiratory antibiotic (Read v2) |
| e91S. | TILORYTH 250mg e/c grans                  | (ii) Respiratory antibiotic (Read v2) |
| e91u. | ERYTHROMYCIN 125mg/5mL suspension         | (ii) Respiratory antibiotic (Read v2) |
| e91v. | ERYTHROMYCIN 250mg/5mL suspension         | (ii) Respiratory antibiotic (Read v2) |
| e91w. | ERYTHROMYCIN 500mg/5mL suspension         | (ii) Respiratory antibiotic (Read v2) |
| e91x. | ERYTHROPEL A 1g/sachet grans              | (ii) Respiratory antibiotic (Read v2) |
| e91X. | ERYTHROMYCIN 250mg e/c grans              | (ii) Respiratory antibiotic (Read v2) |
| e91y. | ERYMAX SPRINKLE 125mg capsules            | (ii) Respiratory antibiotic (Read v2) |
| e91Y. | ERYTHROPEL FORTE SF 500mg/5mL s/f susp    | (ii) Respiratory antibiotic (Read v2) |
| e91z. | ERYTHROPEL 250mg/sachet grans             | (ii) Respiratory antibiotic (Read v2) |
| e921. | CLARITHROMYCIN 250mg tablets              | (ii) Respiratory antibiotic (Read v2) |
| e922. | KLARICID 250mg tablets                    | (ii) Respiratory antibiotic (Read v2) |
| e923. | CLARITHROMYCIN 125mg/5mL suspension       | (ii) Respiratory antibiotic (Read v2) |

|               |                                                 |                                       |
|---------------|-------------------------------------------------|---------------------------------------|
| e924.         | KLARICID 125mg/5mL suspension                   | (ii) Respiratory antibiotic (Read v2) |
| e927.         | CLARITHROMYCIN 500mg tablets                    | (ii) Respiratory antibiotic (Read v2) |
| e928.         | KLARICID 500mg tablets                          | (ii) Respiratory antibiotic (Read v2) |
| e929.         | CLARITHROMYCIN 500mg m/r tabs                   | (ii) Respiratory antibiotic (Read v2) |
| e92A.         | KLARICID XL 500mg m/r tabs                      | (ii) Respiratory antibiotic (Read v2) |
| e92B.         | CLARITHROMYCIN 250mg/sachet grans               | (ii) Respiratory antibiotic (Read v2) |
| e92C.         | KLARICID 250mg/sachet grans                     | (ii) Respiratory antibiotic (Read v2) |
| e92D.         | CLARITHROMYCIN 250mg/5mL suspension             | (ii) Respiratory antibiotic (Read v2) |
| e92E.         | KLARICID 250mg/5mL suspension                   | (ii) Respiratory antibiotic (Read v2) |
| e92F.         | CLARITHROMYCIN 125mg grans                      | (ii) Respiratory antibiotic (Read v2) |
| e92H.         | CLARITHROMYCIN 187.5mg grans                    | (ii) Respiratory antibiotic (Read v2) |
| e92J.         | CLARITHROMYCIN 250mg grans                      | (ii) Respiratory antibiotic (Read v2) |
| e931.         | AZITHROMYCIN 250mg capsules                     | (ii) Respiratory antibiotic (Read v2) |
| e932.         | AZITHROMYCIN 40mg/mL suspension                 | (ii) Respiratory antibiotic (Read v2) |
| e933.         | ZITHROMAX 250mg capsules                        | (ii) Respiratory antibiotic (Read v2) |
| e934.         | ZITHROMAX 40mg/mL suspension                    | (ii) Respiratory antibiotic (Read v2) |
| e935.         | ZITHROMAX 40mg/mL suspension                    | (ii) Respiratory antibiotic (Read v2) |
| e936.         | ZITHROMAX 40mg/mL suspension                    | (ii) Respiratory antibiotic (Read v2) |
| e937.         | AZITHROMYCIN 500mg tablets                      | (ii) Respiratory antibiotic (Read v2) |
| e938.         | ZITHROMAX 500mg tablets                         | (ii) Respiratory antibiotic (Read v2) |
| e939.         | CLAMELLE AZITHROMYCIN 500mg tablets             | (ii) Respiratory antibiotic (Read v2) |
| ec11.         | CO-TRIMOXAZOLE 480mg tablets                    | (ii) Respiratory antibiotic (Read v2) |
| ec12.         | CO-TRIMOXAZOLE 480mg disp tabs                  | (ii) Respiratory antibiotic (Read v2) |
| ec13.         | CO-TRIMOXAZOLE 960mg tablets                    | (ii) Respiratory antibiotic (Read v2) |
| ec14.         | CO-TRIMOXAZOLE 960mg disp tabs                  | (ii) Respiratory antibiotic (Read v2) |
| ec15.         | CO-TRIMOXAZOLE 120mg tablets                    | (ii) Respiratory antibiotic (Read v2) |
| ec16.         | CO-TRIMOXAZOLE 480mg/5mL mixture                | (ii) Respiratory antibiotic (Read v2) |
| ec17.         | CO-TRIMOXAZOLE 240mg/5mL mixture                | (ii) Respiratory antibiotic (Read v2) |
| ec1A.         | CO-TRIMOXAZOLE 240mg/5mL s/f susp               | (ii) Respiratory antibiotic (Read v2) |
| ec2l.         | SEPTRIN 480mg tablets                           | (ii) Respiratory antibiotic (Read v2) |
| ec2m.         | SEPTRIN 480mg disp tabs                         | (ii) Respiratory antibiotic (Read v2) |
| ec2n.         | SEPTRIN FORTE 960mg tablets                     | (ii) Respiratory antibiotic (Read v2) |
| ec2o.         | SEPTRIN PAEDIATRIC 120mg disp tabs              | (ii) Respiratory antibiotic (Read v2) |
| ec2p.         | SEPTRIN 480mg/5mL adult susp                    | (ii) Respiratory antibiotic (Read v2) |
| ec2q.         | SEPTRIN 240mg/5mL suspension                    | (ii) Respiratory antibiotic (Read v2) |
| eg61.         | CIPROXIN 250mg tablets                          | (ii) Respiratory antibiotic (Read v2) |
| eg64.         | CIPROXIN 500mg tablets                          | (ii) Respiratory antibiotic (Read v2) |
| eg65.         | CIPROXIN 750mg tablets                          | (ii) Respiratory antibiotic (Read v2) |
| eg67.         | CIPROFLOXACIN 100mg tablets                     | (ii) Respiratory antibiotic (Read v2) |
| eg68.         | CIPROXIN 100mg tablets                          | (ii) Respiratory antibiotic (Read v2) |
| eg69.         | CIPROFLOXACIN 5g/100mL suspension               | (ii) Respiratory antibiotic (Read v2) |
| eg6A.         | CIPROXIN 5g/100mL suspension                    | (ii) Respiratory antibiotic (Read v2) |
| eg6v.         | CIPROFLOXACIN 750mg tablets                     | (ii) Respiratory antibiotic (Read v2) |
| eg6w.         | CIPROFLOXACIN 500mg tablets                     | (ii) Respiratory antibiotic (Read v2) |
| eg6x.         | CIPROFLOXACIN 250mg tablets                     | (ii) Respiratory antibiotic (Read v2) |
| eg81.         | OFLOXACIN 200mg tablets                         | (ii) Respiratory antibiotic (Read v2) |
| eg82.         | TARIVID 200mg tablets                           | (ii) Respiratory antibiotic (Read v2) |
| eg87.         | TARIVID 400mg tablets                           | (ii) Respiratory antibiotic (Read v2) |
| eg88.         | OFLOXACIN 400mg tablets                         | (ii) Respiratory antibiotic (Read v2) |
| egC1.         | LEVOFLOXACIN 250mg tablets                      | (ii) Respiratory antibiotic (Read v2) |
| egC2.         | LEVOFLOXACIN 500mg tablets                      | (ii) Respiratory antibiotic (Read v2) |
| egC4.         | TAVANIC 250mg tablets                           | (ii) Respiratory antibiotic (Read v2) |
| egC5.         | TAVANIC 500mg tablets                           | (ii) Respiratory antibiotic (Read v2) |
| egD1.         | MOXIFLOXACIN 400mg tablets                      | (ii) Respiratory antibiotic (Read v2) |
| egD2.         | AVELOX 400mg tablets                            | (ii) Respiratory antibiotic (Read v2) |
| ERCA3531      | Erymax Capsules (Gastro-Resistant) 250 mg       | (ii) Respiratory antibiotic (EMIS)    |
| ERCA4890      | Erythromycin Capsules (Gastro-Resistant) 250 mg | (ii) Respiratory antibiotic (EMIS)    |
| ERE/2023NEMIS | Erythromycin E/c tablets 250 mg                 | (ii) Respiratory antibiotic (EMIS)    |

|                |                                                                |                                    |
|----------------|----------------------------------------------------------------|------------------------------------|
| ERGR10346BRIDL | Erythromycin Ethyl Succinate Granules 1 gram/sachet            | (ii) Respiratory antibiotic (EMIS) |
| ERGR25258EMIS  | Erythromycin Ethyl Succinate Granules 125 mg/sachet            | (ii) Respiratory antibiotic (EMIS) |
| ERGR25259EMIS  | Erythromycin Ethyl Succinate Granules 250 mg/sachet            | (ii) Respiratory antibiotic (EMIS) |
| ERGR25260EMIS  | Erythromycin Ethyl Succinate Granules 500 mg/sachet            | (ii) Respiratory antibiotic (EMIS) |
| ERGR9480HILLI  | Erythroped Granules forte 500 mg/sachet                        | (ii) Respiratory antibiotic (EMIS) |
| ERMI25261EMIS  | Erythromycin Ethyl Succinate Mixture 125 mg/5 ml               | (ii) Respiratory antibiotic (EMIS) |
| ERMI25262EMIS  | Erythromycin Ethyl Succinate Mixture 250 mg/5 ml               | (ii) Respiratory antibiotic (EMIS) |
| ERMI25263EMIS  | Erythromycin Ethyl Succinate Mixture 500 mg/5 ml               | (ii) Respiratory antibiotic (EMIS) |
| ERP.19608EMIS  | Erythroped P.i. sachets 125 mg/sachet                          | (ii) Respiratory antibiotic (EMIS) |
| ERP.19609EMIS  | Erythroped P.i. sugar-free suspension 125 mg/5 ml              | (ii) Respiratory antibiotic (EMIS) |
| ERPA1102       | Erythromycin Paediatric suspension 125 mg/5 ml                 | (ii) Respiratory antibiotic (EMIS) |
| ERPA1106       | Erythroped P.i. suspension 125 mg/5 ml                         | (ii) Respiratory antibiotic (EMIS) |
| ERSA19604EMIS  | Erythroped Sachets 250 mg/sachet                               | (ii) Respiratory antibiotic (EMIS) |
| ERSA8879BRIDL  | Erythroped A Sachets 1 gram/sachet                             | (ii) Respiratory antibiotic (EMIS) |
| ERSP8479EGTON  | Erymax Sprinkle capsules 125 mg                                | (ii) Respiratory antibiotic (EMIS) |
| ERST3539       | Erythromycin Tablets 250 mg                                    | (ii) Respiratory antibiotic (EMIS) |
| ERST3540       | Erythromycin Stearate tablets 500 mg                           | (ii) Respiratory antibiotic (EMIS) |
| ERST4896       | Erythromycin (As Stearate) Stearate tablets 250 mg             | (ii) Respiratory antibiotic (EMIS) |
| ERSU1107       | Erythroped Suspension 250 mg/5 ml                              | (ii) Respiratory antibiotic (EMIS) |
| ERSU1108       | Erythroped Suspension forte Sugar Free 500 mg/5 ml             | (ii) Respiratory antibiotic (EMIS) |
| ERSU19605EMIS  | Erythroped Sugar-free suspension 250 mg/5 ml                   | (ii) Respiratory antibiotic (EMIS) |
| ERSU25264EMIS  | Erythromycin Ethyl Succinate Sugar-free suspension 125 mg/5 ml | (ii) Respiratory antibiotic (EMIS) |
| ERSU25265EMIS  | Erythromycin Ethyl Succinate Sugar-free suspension 250 mg/5 ml | (ii) Respiratory antibiotic (EMIS) |
| ERSU25266EMIS  | Erythromycin Ethyl Succinate Suspension 125 mg/5 ml            | (ii) Respiratory antibiotic (EMIS) |
| ERSU25267EMIS  | Erythromycin Ethyl Succinate Suspension 250 mg/5 ml            | (ii) Respiratory antibiotic (EMIS) |
| ERSU25268EMIS  | Erythromycin Ethyl Succinate Suspension 500 mg/5 ml            | (ii) Respiratory antibiotic (EMIS) |
| ERSU28989EMIS  | Erythromycin Ethyl Succinate Sugar-free suspension 500 mg/5 ml | (ii) Respiratory antibiotic (EMIS) |
| ERSU3542       | Erythroped Sugar free granules 250 mg/sachet                   | (ii) Respiratory antibiotic (EMIS) |
| ERSU4893       | Erythromycin Sugar free granules 250 mg/sachet                 | (ii) Respiratory antibiotic (EMIS) |
| ERTA10453BRIDL | Erythromycin Ethyl Succinate Tablets 500 mg                    | (ii) Respiratory antibiotic (EMIS) |
| ERTA3533       | Erythrocin Tablets 250 mg                                      | (ii) Respiratory antibiotic (EMIS) |
| ERTA3534       | Erythrocin Tablets 500 mg                                      | (ii) Respiratory antibiotic (EMIS) |
| ERTA3541       | Erythromycin Tablets 500 mg                                    | (ii) Respiratory antibiotic (EMIS) |
| ERTA3543       | Erythroped A Tablets 500 mg                                    | (ii) Respiratory antibiotic (EMIS) |
| GACA10300BRIDL | Galenamox Capsules 250 mg                                      | (ii) Respiratory antibiotic (EMIS) |
| GACA10302BRIDL | Galenamox Capsules 500 mg                                      | (ii) Respiratory antibiotic (EMIS) |
| GASU10304BRIDL | Galenamox Suspension 250 mg/5 ml                               | (ii) Respiratory antibiotic (EMIS) |
| GASU10306BRIDL | Galenamox Suspension 125 mg/5 ml                               | (ii) Respiratory antibiotic (EMIS) |
| KECA1547       | Keflex Capsules 250 mg                                         | (ii) Respiratory antibiotic (EMIS) |
| KECA1548       | Keflex Capsules 500 mg                                         | (ii) Respiratory antibiotic (EMIS) |
| KECH1553       | Keflex-C Chewable tablets 125 mg                               | (ii) Respiratory antibiotic (EMIS) |
| KECH1554       | Keflex-C Chewable tablets 250 mg                               | (ii) Respiratory antibiotic (EMIS) |
| KESU1549       | Keflex Suspension 125 mg/5 ml                                  | (ii) Respiratory antibiotic (EMIS) |
| KESU1550       | Keflex Suspension 250 mg/5 ml                                  | (ii) Respiratory antibiotic (EMIS) |
| KETA1551       | Keflex Tablets 250 mg                                          | (ii) Respiratory antibiotic (EMIS) |
| KETA1552       | Keflex Tablets 500 mg                                          | (ii) Respiratory antibiotic (EMIS) |
| KLM/30083EMIS  | Klaricid XI M/R tablets 500 mg                                 | (ii) Respiratory antibiotic (EMIS) |
| KLPA22475EMIS  | Klaricid Paediatric suspension 125 mg/5 ml                     | (ii) Respiratory antibiotic (EMIS) |
| KLPA771NEMIS   | Klaricid Paediatric suspension 250 mg/5 ml                     | (ii) Respiratory antibiotic (EMIS) |
| KLSA31716EMIS  | Klaricid Sachets 250 mg/sachet                                 | (ii) Respiratory antibiotic (EMIS) |
| KLTA26170EMIS  | Klaricid Tablets 500 mg                                        | (ii) Respiratory antibiotic (EMIS) |
| KLTA9107EMIS   | Klaricid Tablets 250 mg                                        | (ii) Respiratory antibiotic (EMIS) |
| LETA32269EMIS  | Levofloxacin Tablets 250 mg                                    | (ii) Respiratory antibiotic (EMIS) |
| LETA32270EMIS  | Levofloxacin Tablets 500 mg                                    | (ii) Respiratory antibiotic (EMIS) |
| LYCA5100       | Lymecycline Capsules 204 mg                                    | (ii) Respiratory antibiotic (EMIS) |
| LYCA5101       | Lymecycline Capsules 408 mg                                    | (ii) Respiratory antibiotic (EMIS) |
| MOTA15042NEMIS | Moxifloxacin Tablets 400 mg                                    | (ii) Respiratory antibiotic (EMIS) |
| OFTA10706BRIDL | Ofloxacin Tablets 200 mg                                       | (ii) Respiratory antibiotic (EMIS) |

|                |                                                |                                    |
|----------------|------------------------------------------------|------------------------------------|
| OFTA23520EMIS  | Ofloxacin Tablets 400 mg                       | (ii) Respiratory antibiotic (EMIS) |
| OXCA5242       | Oxytetracycline Hydrochloride Capsules 250 mg  | (ii) Respiratory antibiotic (EMIS) |
| OXMI4104       | Oxytetracycline Mixture 125 mg/5 ml            | (ii) Respiratory antibiotic (EMIS) |
| OXS5240        | Oxytetracycline Syrup 125 mg/5 ml              | (ii) Respiratory antibiotic (EMIS) |
| OXTA2146       | Oxytetracycline Tablets 250 mg                 | (ii) Respiratory antibiotic (EMIS) |
| OXTA4102       | Oxymycin Tablets 250 mg                        | (ii) Respiratory antibiotic (EMIS) |
| OXTA5241       | Oxytetracycline Dihydrate Tablets 250 mg       | (ii) Respiratory antibiotic (EMIS) |
| PECA2172       | Penbritin Capsules 250 mg                      | (ii) Respiratory antibiotic (EMIS) |
| PECA2173       | Penbritin Capsules 500 mg                      | (ii) Respiratory antibiotic (EMIS) |
| PEPA2176       | Penbritin Paediatric suspension 125 mg/1.25 ml | (ii) Respiratory antibiotic (EMIS) |
| PEPA2177       | Penbritin Paediatric tablets 125 mg            | (ii) Respiratory antibiotic (EMIS) |
| PESY2178       | Penbritin Syrup 125 mg/5 ml                    | (ii) Respiratory antibiotic (EMIS) |
| PESY2179       | Penbritin Syrup forte 250 mg/5 ml              | (ii) Respiratory antibiotic (EMIS) |
| SEAD2540       | Seprin Adult suspension 480 mg/5 ml            | (ii) Respiratory antibiotic (EMIS) |
| SEDI2541       | Seprin Dispersible tablets 480 mg              | (ii) Respiratory antibiotic (EMIS) |
| SEFO2542       | Seprin Forte tablets 960 mg                    | (ii) Respiratory antibiotic (EMIS) |
| SEPA2545       | Seprin Paediatric suspension 240 mg/5 ml       | (ii) Respiratory antibiotic (EMIS) |
| SEPA2546       | Seprin Paediatric tablets 120 mg               | (ii) Respiratory antibiotic (EMIS) |
| SETA2547       | Seprin Tablets 480 mg                          | (ii) Respiratory antibiotic (EMIS) |
| SETA2548       | Seprin Forte Tablets 960 mg                    | (ii) Respiratory antibiotic (EMIS) |
| SUCA22413NEMIS | Suprax Capsules 400 mg                         | (ii) Respiratory antibiotic (EMIS) |
| SUPA10644BRIDL | Suprax Paediatric suspension 100 mg/5 ml       | (ii) Respiratory antibiotic (EMIS) |
| SUTA8925EGTON  | Suprax Tablets 200 mg                          | (ii) Respiratory antibiotic (EMIS) |
| TATA23518EMIS  | Tarivid Tablets 400 mg                         | (ii) Respiratory antibiotic (EMIS) |
| TATA32263EMIS  | Tavanic Tablets 250 mg                         | (ii) Respiratory antibiotic (EMIS) |
| TATA32264EMIS  | Tavanic Tablets 500 mg                         | (ii) Respiratory antibiotic (EMIS) |
| TATA8954EMIS   | Tarivid Tablets 200 mg                         | (ii) Respiratory antibiotic (EMIS) |
| TECA4411       | Tetralysal 300 Capsules 408 mg                 | (ii) Respiratory antibiotic (EMIS) |
| TECA5420       | Tetracycline Hydrochloride Capsules 250 mg     | (ii) Respiratory antibiotic (EMIS) |
| TEMI5423       | Tetracycline Hydrochloride Mixture 125 mg/5 ml | (ii) Respiratory antibiotic (EMIS) |
| TES/10779BRIDL | Tetracycline Hydrochloride S/r capsules 250 mg | (ii) Respiratory antibiotic (EMIS) |
| TESY5425       | Tetracycline Hydrochloride Syrup 125 mg/5 ml   | (ii) Respiratory antibiotic (EMIS) |
| TETA5426       | Tetracycline Hydrochloride Tablets 250 mg      | (ii) Respiratory antibiotic (EMIS) |
| TICA27975EMIS  | Tiloryth Capsules 250 mg                       | (ii) Respiratory antibiotic (EMIS) |
| VICA4503       | Vibramycin Capsules 100 mg                     | (ii) Respiratory antibiotic (EMIS) |
| VICA4504       | Vibramycin Capsules 50 mg                      | (ii) Respiratory antibiotic (EMIS) |
| VISY4505       | Vibramycin Syrup 50 mg/5 ml                    | (ii) Respiratory antibiotic (EMIS) |
| VITA3041       | Vibramycin-D Dispersible tablets 100 mg        | (ii) Respiratory antibiotic (EMIS) |
| ZICA1003EMIS   | Zithromax Capsules 250 mg                      | (ii) Respiratory antibiotic (EMIS) |
| ZISA20463EMIS  | Zinnat Sachets 125 mg/sachet                   | (ii) Respiratory antibiotic (EMIS) |
| ZISU9169EMIS   | Zinnat Suspension 125 mg/5 ml                  | (ii) Respiratory antibiotic (EMIS) |
| ZISU9377EMIS   | Zithromax Suspension 200 mg/5 ml               | (ii) Respiratory antibiotic (EMIS) |
| ZITA10283BRIDL | Zinnat Tablets 250 mg                          | (ii) Respiratory antibiotic (EMIS) |
| ZITA14216NEMIS | Zinnat Tablets 500 mg                          | (ii) Respiratory antibiotic (EMIS) |
| ZITA34167EMIS  | Zithromax Tablets 500 mg                       | (ii) Respiratory antibiotic (EMIS) |
| ZITA5627       | Zinnat Tablets 125 mg                          | (ii) Respiratory antibiotic (EMIS) |
| fe61.          | PREDNISOLONE 1mg tablets                       | (ii) Oral corticosteroid (Read v2) |
| fe62.          | PREDNISOLONE 5mg tablets                       | (ii) Oral corticosteroid (Read v2) |
| fe6f.          | PREDNESOL 5mg tablets                          | (ii) Oral corticosteroid (Read v2) |
| fe6h.          | PREDNISOLONE 2.5mg e/c tabs                    | (ii) Oral corticosteroid (Read v2) |
| fe6i.          | PREDNISOLONE 5mg e/c tabs                      | (ii) Oral corticosteroid (Read v2) |
| fe6j.          | PREDNISOLONE 5mg sol.tabs                      | (ii) Oral corticosteroid (Read v2) |
| fe6k.          | PREDNISOLONE 50mg tablets                      | (ii) Oral corticosteroid (Read v2) |
| fe6v.          | PREDNISOLONE 2.5mg tablets                     | (ii) Oral corticosteroid (Read v2) |
| fe6w.          | PREDNISOLONE 2.5mg tablets                     | (ii) Oral corticosteroid (Read v2) |
| fe6z.          | PREDNISOLONE 25mg tablets                      | (ii) Oral corticosteroid (Read v2) |
| PREN8411EGTON  | Prednisolone E/c tablets 2.5 mg                | (ii) Oral corticosteroid (EMIS)    |
| PREN8412EGTON  | Prednisolone E/c tablets 5 mg                  | (ii) Oral corticosteroid (EMIS)    |

|                |                                                                              |                                                |
|----------------|------------------------------------------------------------------------------|------------------------------------------------|
| PRSO10225BRIDL | Prednisolone Soluble tablets 5 mg                                            | (ii) Oral corticosteroid (EMIS)                |
| PRTA18432EMIS  | Prednisolone Tablets 25 mg                                                   | (ii) Oral corticosteroid (EMIS)                |
| PRTA2326       | Prednisolone Tablets 1 mg                                                    | (ii) Oral corticosteroid (EMIS)                |
| PRTA2327       | Prednisolone Tablets 2.5 mg                                                  | (ii) Oral corticosteroid (EMIS)                |
| PRTA2328       | Prednisolone Tablets 5 mg                                                    | (ii) Oral corticosteroid (EMIS)                |
| PRTA4200       | Prednesol Soluble tablets 5 mg                                               | (ii) Oral corticosteroid (EMIS)                |
| J40X           | Bronchitis not specified as acute or chronic                                 | (iii) COPD-related inpatient admission (ICD10) |
| J42X           | Unspecified chronic bronchitis                                               | (iii) COPD-related inpatient admission (ICD10) |
| J432           | Centrilobular emphysema                                                      | (iii) COPD-related inpatient admission (ICD10) |
| J439           | Emphysema unspecified                                                        | (iii) COPD-related inpatient admission (ICD10) |
| J440           | Chronic obstructive pulmonary disease with acute lower respiratory infection | (iii) COPD-related inpatient admission (ICD10) |
| J441           | Chronic obstructive pulmonary disease with acute exacerbation unspecified    | (iii) COPD-related inpatient admission (ICD10) |
| J448           | Other specified chronic obstructive pulmonary disease                        | (iii) COPD-related inpatient admission (ICD10) |
| J449           | Chronic obstructive pulmonary disease unspecified                            | (iii) COPD-related inpatient admission (ICD10) |

### Compiling the DOSE index: Dyspnoea component

The Dyspnoea component was identified using Read codes in the patient's primary care record that were indicative of the Medical Research Council dyspnoea scale assessment.

| Code  | Description                   |
|-------|-------------------------------|
| 173H. | MRC Breathless Scale: grade 1 |
| 173I. | MRC Breathless Scale: grade 2 |
| 173J. | MRC Breathless Scale: grade 3 |
| 173K. | MRC Breathless Scale: grade 4 |
| 173L. | MRC Breathless Scale: grade 5 |

### Compiling the DOSE index: Obstruction component

The Obstruction component was primarily identified using Read codes in the patient's primary care record that were indicative of the percent predicted forced expiratory volume in one second (FEV<sub>1</sub>%). FEV<sub>1</sub>% values were taken as being out of valid clinical range (OOR) and excluded where less than 10% or greater than 140%.

| Code  | Description                   |
|-------|-------------------------------|
| 339S. | Percent predicted FEV1        |
| 339S0 | Percent pred FEV1 bronchodiin |

To minimise data loss we calculated FEV<sub>1</sub>% values from valid forced expiratory volume in one second values (FEV<sub>1</sub>), only where they were identified on dates where FEV<sub>1</sub>% records were absent or OOR. The equations used to convert FEV<sub>1</sub> to FEV<sub>1</sub>% were <sup>9</sup>:

- **If patient male;**  $FEV_1\% = \left\{ \frac{FEV_1}{[(4.30 \times Patient\ height) - (0.029 \times Patient\ age) - 2.49]} \right\} \times 100$
- **If patient female;**  $FEV_1\% = \left\{ \frac{FEV_1}{[(3.95 \times Patient\ height) - (0.025 \times Patient\ age) - 2.60]} \right\} \times 100$

FEV<sub>1</sub> assessment values were themselves taken as being OOR and excluded where less than 0.2 litres or greater than 7.0 litres. Patient height values were standardised into metres, and taken as being OOR and excluded where less than 1.219m (4'0") or greater than 2.134m (7'0").



| Code  | Description                    |
|-------|--------------------------------|
| 339a. | FEV1 before bronchodilation    |
| 339b. | FEV1 after bronchodilation     |
| 339e. | FEV1 pre steroids              |
| 339f. | FEV1 post steroids             |
| 339O. | Forced expired volume in 1 sec |
| 229.. | O/E - height                   |
| 2291. | O/E-height > 20% below average |
| 2292. | O/E - height 10-20% < average  |
| 2293. | O/E -height within 10% average |
| 2294. | O/E-height 10-20% over average |
| 2295. | O/E -height > 20% over average |
| 229Z. | O/E - height NOS               |
| 22Z.. | Height and Weight              |

### Compiling the DOSE index: Smoking component

The Smoking component was identified using Read codes in the patient's primary care record indicating their smoking status at the time of recording, aggregated to create three broad categories: current smoker, ex-smoker and never smoked. As only current smoking takes a non-zero score for calculation of the DOSE index, both ex- smoker and never smoked status were taken as non-smoker. For the same reason we determined prior to data analysis that if conflicting codes for both current and any other smoking status were recorded on the same date, the current smoker status would be selected.

Our definition of current smoking included those smoking cessation advice codes (including codes for medication used in smoking cessation support) which implied that the patient was an active smoker at the time of recording. We especially excluded those few non-specific smoking advice codes (that could equally be employed in counselling never smokers as smokers) from any smoking category definition. Our ex-smoker code list includes only codes that indicate that a patient has stopped smoking at the time of the record. We believe that we reduced the likelihood of misclassifying patients in the process of giving up smoking as ex-smokers by including all smoking-cessation support codes in the list of codes that define current smokers.

| Code  | Description                    | Defined as     |
|-------|--------------------------------|----------------|
| 137.. | Tobacco consumption            | Current Smoker |
| 1372. | Trivial smoker - < 1 cig/day   | Current Smoker |
| 1373. | Light smoker - 1-9 cigs/day    | Current Smoker |
| 1374. | Moderate smoker - 10-19 cigs/d | Current Smoker |
| 1375. | Heavy smoker - 20-39 cigs/day  | Current Smoker |
| 1376. | Very heavy smoker - 40+cigs/d  | Current Smoker |
| 137b. | Ready to stop smoking          | Current Smoker |
| 137c. | Thinking about stop smoking    | Current Smoker |
| 137C. | Keeps trying to stop smoking   | Current Smoker |
| 137d. | Not interested in stop smoking | Current Smoker |
| 137D. | Admitted tobacco cons untrue ? | Current Smoker |
| 137e. | Smoking restarted              | Current Smoker |
| 137E. | Tobacco consumption unknown    | Current Smoker |
| 137f. | Reason for restarting smoking  | Current Smoker |
| 137G. | Trying to give up smoking      | Current Smoker |
| 137h. | Min from wake to 1st tobac con | Current Smoker |
| 137H. | Pipe smoker                    | Current Smoker |
| 137J. | Cigar smoker                   | Current Smoker |
| 137m. | Failed attempt to stop smoking | Current Smoker |
| 137M. | Rolls own cigarettes           | Current Smoker |

|       |                                 |                |
|-------|---------------------------------|----------------|
| 137n. | Total time smoked               | Current Smoker |
| 137P. | Cigarette smoker                | Current Smoker |
| 137Q. | Smoking started                 | Current Smoker |
| 137R. | Current smoker                  | Current Smoker |
| 137V. | Smoking reduced                 | Current Smoker |
| 13p0. | Negotiatd date cessatn smoking  | Current Smoker |
| 13p5. | Smoking cesn progrm start date  | Current Smoker |
| 13p50 | Practice smok cess pr strt dat  | Current Smoker |
| 67H6. | Brf intervention smoking cesn   | Current Smoker |
| 745H. | Smoking cessation therapy       | Current Smoker |
| 745H0 | Nic rep thera us nicot ptches   | Current Smoker |
| 745H1 | Nicot repl thera us nicot gum   | Current Smoker |
| 745H2 | Nic repl thera us nic inhalatr  | Current Smoker |
| 745H3 | Nic repl thera us nic lozenges  | Current Smoker |
| 745H4 | Smoking cessation drug therapy  | Current Smoker |
| 745Hy | OS smoking cessation therapy    | Current Smoker |
| 745Hz | Smoking cessation therapy NOS   | Current Smoker |
| 8CAg. | Smoke cess advi prov com pharm  | Current Smoker |
| 8CAL. | Smoking cessation advice        | Current Smoker |
| 8CdB. | Stop smok serv opport signpost  | Current Smoker |
| 8H7i. | Referral: smok cessatn advisor  | Current Smoker |
| 8HBM. | Stop smoking fce to fce flw-up  | Current Smoker |
| 8HBP. | Smoking cesn 12 week follow-up  | Current Smoker |
| 8HkQ. | Refer to NHS stop smoking srvc  | Current Smoker |
| 8HTK. | Referl to stop-smoking clinic   | Current Smoker |
| 8IAj. | Smok cessation advice declined  | Current Smoker |
| 8IEK. | Smok cessation program declined | Current Smoker |
| 8IEM. | Smoking cess drug therapy decl  | Current Smoker |
| 8IEo. | Ref smoking cesn serv declnd    | Current Smoker |
| 8T08. | Ref to smoking cesn service     | Current Smoker |
| 9hG.. | Except repor: smoking qual ind  | Current Smoker |
| 9hG0. | Except smok qual ind: Pt uns    | Current Smoker |
| 9hG1. | Except smok qual ind: Inf diss  | Current Smoker |
| 9kc.. | Smoking cessation - enh se adm  | Current Smoker |
| 9kc0. | Smok ces templt completd - ESA  | Current Smoker |
| 9kf1. | Ref COPD stru smok asses - ESA  | Current Smoker |
| 9kf2. | COPD stru smok ass decld - ESA  | Current Smoker |
| 9ko.. | Currnt smokr annua reviw - ESA  | Current Smoker |
| 9N2k. | Seen by smoking cesstn advisor  | Current Smoker |
| 9N4M. | DNA - Smoking cessation clinic  | Current Smoker |
| 9Ndg. | Dec con f flw up by smk cess t  | Current Smoker |
| 9NdZ. | Dec con for smok cess data sha  | Current Smoker |
| 9NS02 | Ref smoking cessat serv offer   | Current Smoker |
| 9OO.. | Stop smoking monitoring admin.  | Current Smoker |
| 9OO1. | Attends stop smoking monitor.   | Current Smoker |
| 9OO2. | Refuses stop smoking monitor    | Current Smoker |
| 9OO3. | Stop smoking monitor default    | Current Smoker |
| 9OO4. | Stop smoking monitor 1st lettr  | Current Smoker |
| 9OO5. | Stop smoking monitor 2nd lettr  | Current Smoker |
| 9OO6. | Stop smoking monitor 3rd lettr  | Current Smoker |
| 9OO7. | Stop smoking monitor verb.inv.  | Current Smoker |
| 9OO8. | Stop smoking monitor phone inv  | Current Smoker |
| 9OO9. | Stop smoking monitoring delete  | Current Smoker |
| 9OOA. | Stop smoking monitor.chck done  | Current Smoker |
| 9OOB. | Stop smokg invtn SMS txt mssge  | Current Smoker |
| 9OOB0 | Stop smoking ivtn 1st txt msge  | Current Smoker |
| 9OOB1 | Stop smoking ivtn 2nd txt msge  | Current Smoker |
| 9OOB2 | Stop smoking ivtn 3rd txt msge  | Current Smoker |

|       |                                |                |
|-------|--------------------------------|----------------|
| 900Z. | Stop smoking monitor admin.NOS | Current Smoker |
| 1377. | Ex-trivial smoker (<1/day)     | Ex-Smoker      |
| 1378. | Ex-light smoker (1-9/day)      | Ex-Smoker      |
| 1379. | Ex-moderate smoker (10-19/day) | Ex-Smoker      |
| 137A. | Ex-heavy smoker (20-39/day)    | Ex-Smoker      |
| 137B. | Ex-very heavy smoker (40+/day) | Ex-Smoker      |
| 137F. | Ex-smoker - amount unknown     | Ex-Smoker      |
| 137j. | Ex-cigarette smoker            | Ex-Smoker      |
| 137K. | Stopped smoking                | Ex-Smoker      |
| 137K0 | Recently stopped smoking       | Ex-Smoker      |
| 137L. | Ex roll-up cigarette smoker    | Ex-Smoker      |
| 137L. | Current non-smoker             | Ex-Smoker      |
| 137N. | Ex pipe smoker                 | Ex-Smoker      |
| 137O. | Ex cigar smoker                | Ex-Smoker      |
| 137S. | Ex smoker                      | Ex-Smoker      |
| 137T. | Date ceased smoking            | Ex-Smoker      |
| 13p4. | Smoking free weeks             | Ex-Smoker      |
| 9km.. | Ex-smoker annual review - ESA  | Ex-Smoker      |
| 1371. | Never smoked tobacco           | Never Smoked   |

### Compiling the DOSE index: Algorithmic calculation

Patients required at least one valid Obstruction record to qualify for entry to the algorithm. Having selected a qualifying Obstruction record, the patient's clinical record was then reviewed (as detailed above) to identify and score attendant Dyspnoea, Smoking and Exacerbation records occurring during the preceding year (defined as 365 days). For Dyspnoea and Smoking components, any valid record occurring on the same date as the Obstruction record was selected, or, if absent, the closest record within the preceding year. For Exacerbation the total number of distinct incident episodes during the preceding year was counted.

Having identified a single Dyspnoea and Smoking record and the annual number of Exacerbations within the year preceding the qualifying Obstruction record, the composite index score was calculated by totalling the associated component scores according to the table below <sup>10</sup>. The composite score had maximum range 0 to 8 points, and was stratified into three risk groups at  $\leq 3$  (low risk), 4-5 (moderate risk) and  $\geq 6$  points (high risk) <sup>11</sup>.

|           |                                               | Score allocation |         |             |          |
|-----------|-----------------------------------------------|------------------|---------|-------------|----------|
|           |                                               | 0 points         | 1 point | 2 points    | 3 points |
| Component | MRC dyspnoea scale<br>(Dyspnoea)              | 0-1              | 2       | 3           | 4        |
|           | FEV <sub>1</sub> % predicted<br>(Obstruction) | $\geq 50\%$      | 30%-50% | $\leq 30\%$ | n/a      |
|           | Smoking status<br>(Smoking)                   | Non-smoker       | Smoker  | n/a         | n/a      |
|           | Number of exacerbations<br>(Exacerbation)     | 0-1              | 2-3     | $\geq 3$    | n/a      |

The first DOSE score instance was associated with the earliest qualifying Obstruction record during the study period, and could take any date between 1<sup>st</sup> January 2010 and 31<sup>st</sup> December 2014. Subsequent instances were associated with the earliest qualifying Obstruction record a minimum of one year after the previous and a maximum of four years after the first.

## Comorbidities

Unlike the approach to defining the cohort, our comorbidity code lists included both diagnostic and 'process of care' Read codes. This was to prioritise sensitivity over specificity, thereby increasing our confidence that patients without codes for the comorbidity had not received this diagnosis. Code lists were created independently by three clinicians, with the final list derived by consensus, justifying inclusion of each code if it alone suggested a very high likelihood that the patient had the comorbid disease in question. Codes for medication specific to dementia (Donepezil/Aricept) and idiopathic pulmonary fibrosis (Pirfenidone/Esbriet) were included in code lists for these comorbidities, as their use is specific to these conditions.

| Code          | Description                      |
|---------------|----------------------------------|
| <b>Asthma</b> |                                  |
| 173A.         | Exercise induced asthma          |
| 173c.         | Occupational asthma              |
| 173d.         | Work aggravated asthma           |
| 1780.         | Aspirin induced asthma           |
| 1781.         | Asthma trigger - pollen          |
| 1782.         | Asthma trigger - tobacco smoke   |
| 1783.         | Asthma trigger - warm air        |
| 1784.         | Asthma trigger - emotion         |
| 1785.         | Asthma trigger - damp            |
| 1786.         | Asthma trigger - animals         |
| 1787.         | Asthma trigger - seasonal        |
| 1788.         | Asthma trigger - cold air        |
| 1789.         | Asthma trigger respiratory inf   |
| 178A.         | Asthma trigger - airborne dust   |
| 178B.         | Asthma trigger - exercise        |
| 102..         | Asthma confirmed                 |
| 388t.         | RCP asthma assessment            |
| 38DL.         | Asthma control test              |
| 38DT.         | Asthma control questionnaire     |
| 38DV.         | Mini asthma QOL questionnaire    |
| 661M1         | Asthma self-manage plan agreed   |
| 661N1         | Asthma self-manage plan review   |
| 663d.         | Emerg asthm adm since 1st appt   |
| 663e.         | Asthma restricts exercise        |
| 663e000       | Asthma sometime restr exercise   |
| 663e100       | Asthma severely restr exercise   |
| 663f.         | Asthma never restricts exercise  |
| 663j.         | Asthma - currently active        |
| 663m.         | Asth A&E attend since last vis   |
| 663n.         | Asth treat compliance satisfac   |
| 663N.         | Asthma disturbing sleep          |
| 663N0         | Asthma causing night waking      |
| 663N1         | Asthma disturbs sleep weekly     |
| 663N2         | Asthma disturbs sleep frequently |
| 663O.         | Asthma not disturbing sleep      |
| 663O0         | Asthma never disturbs sleep      |
| 663p.         | Asth treat compliance unsatisf   |
| 663P.         | Asthma limiting activities       |
| 663P0         | Asthma limit act 1-2 time mth    |
| 663P1         | Asth limit activ 1 - 2 time wk   |
| 663P2         | Asthma limits activit most day   |
| 663q.         | Asthma daytime symptoms          |
| 663Q.         | Asthma not limiting activities   |
| 663r.         | Asthma night symp 1-2 per mth    |

|       |                                |
|-------|--------------------------------|
| 663s. | Asthma never causes day symps  |
| 663t. | Asthma day symp 1-2 per mth    |
| 663u. | Asthma day symp 1-2 per week   |
| 663U. | Asthma management plan given   |
| 663v. | Asthma daytime symps most days |
| 663V. | Asthma severity                |
| 663V0 | Occasional asthma              |
| 663V1 | Mild asthma                    |
| 663V2 | Moderate asthma                |
| 663V3 | Severe asthma                  |
| 663w. | Asthm limits walk hills/stairs |
| 663x. | Asthma limits walking on flat  |
| 663y. | Num asthm exacs in past year   |
| 66Y5. | Change in asthma managemt plan |
| 66Y9. | Step up chnge asthm managmt pl |
| 66YA. | Step down chnge asthm manag pl |
| 66YC. | Absent work/schl due to asthma |
| 66YJ. | Asthma annual review           |
| 66YK. | Asthma follow-up               |
| 66Yp. | Asthma review RCP 3 questions  |
| 66YP. | Asthma night-time symptoms     |
| 66Yq. | Asthma night symptom 1 to 2 wk |
| 66YQ. | Asthma monitoring by nurse     |
| 66Yr. | Asthma cause sympt most nights |
| 66YR. | Asthma monitoring by doctor    |
| 66Ys. | Asthma never caus night symptm |
| 66Yu. | Num dy abs sch asthma pst 6 mn |
| 8793. | Asthma control step 0          |
| 8794. | Asthma control step 1          |
| 8795. | Asthma control step 2          |
| 8796. | Asthma control step 3          |
| 8797. | Asthma control step 4          |
| 8798. | Asthma control step 5          |
| 8B3j. | Asthma medication review       |
| 8CMA0 | Pat writt asthma pers act plan |
| 8CR0. | Asthma clin management plan    |
| 8H2P. | Emergency admission            |
| 9hA.. | Except report: asthma qual ind |
| 9hA1. | Except asthma qual ind: Pt uns |
| 9hA2. | Excep asthma qual ind: Inf dis |
| 9OJA. | Asthma monitoring check done   |
| H3120 | Chronic asthmatic bronchitis   |
| H33.. | Asthma                         |
| H330. | Extrinsic (atopic) asthma      |
| H3300 | Extrinsic asthma - no status   |
| H3301 | Extrinsic asthma + status      |
| H330z | Extrinsic asthma NOS           |
| H331. | Intrinsic asthma               |
| H3310 | Intrinsic asthma - no status   |
| H3311 | Intrinsic asthma + status      |
| H331z | Intrinsic asthma NOS           |
| H332. | Mixed asthma                   |
| H333. | Acute exacerbation of asthma   |
| H334. | Brittle asthma                 |
| H335. | Chron asthm w fix airflw obstr |
| H33z. | Asthma unspecified             |
| H33z0 | Status asthmaticus NOS         |
| H33z1 | Asthma attack                  |

|                                |                                |
|--------------------------------|--------------------------------|
| H33z2                          | Late-onset asthma              |
| H33zz                          | Asthma NOS                     |
| H35y6                          | Sequoiosis (red-cedar asthma)  |
| H35y7                          | Wood asthma                    |
| H47y0                          | Detergent asthma               |
| <b>Ischaemic Heart Disease</b> |                                |
| 14A3.                          | H/O: myocardial infarct <60    |
| 14A4.                          | H/O: myocardial infarct >60    |
| 14AH.                          | H/O: Myoc infarct in last year |
| 14AT.                          | H/O: myocardial infarction     |
| 14AW.                          | H/O acute coronary syndrome    |
| 187..                          | Frequency of angina            |
| 323..                          | ECG: myocardial infarction     |
| 3232.                          | ECG: old myocardial infarction |
| 3233.                          | ECG: antero-septal infarct.    |
| 3234.                          | ECG:posterior/inferior infarct |
| 3235.                          | ECG: subendocardial infarct    |
| 3236.                          | ECG: lateral infarction        |
| 323Z.                          | ECG: myocardial infarct NOS    |
| 3889.                          | Euroscore for angina           |
| 388E.                          | Canad Card Soc classif angina  |
| 388F.                          | CLASP angina score             |
| 661M0                          | Angina self-manage plan agreed |
| 661N0                          | Angina self-manage plan review |
| 662K.                          | Angina control                 |
| 662K0                          | Angina control - good          |
| 662K1                          | Angina control - poor          |
| 662K2                          | Angina control - improving     |
| 662K3                          | Angina control - worsening     |
| 662K4                          | Angina self manage pln commenc |
| 662K5                          | Angina self manage pln complet |
| 662Kz                          | Angina control NOS             |
| 662N.                          | CHD monitoring                 |
| 6A2..                          | Corony heart dis annual review |
| 6A4..                          | Coronary heart disease review  |
| 7920.                          | Saphen v graft repl coronary a |
| 79200                          | Saphen v graft repl 1 cor art  |
| 79201                          | Saphen v graft repl 2 cor art  |
| 79202                          | Saphen v graft repl 3 cor art  |
| 79203                          | Saphen v graft repl 4+ cor art |
| 7920y                          | Saph vein graft repl cor a OS  |
| 7920z                          | Saph vein graft repl cor a NOS |
| 7921.                          | Other autograft rep coronary a |
| 79210                          | Autograft rep 1 coronary a NEC |
| 79211                          | Autograft rep 2 coronary a NEC |
| 79212                          | Autograft rep 3 coronary a NEC |
| 79213                          | Autogr repl 4+ coronary a NEC  |
| 7921y                          | Other autograft repl cor a OS  |
| 7921z                          | Other autograft repl cor a NOS |
| 7922.                          | Allograft replac coronary art  |
| 79220                          | Allograft replac 1 coronary a  |
| 79221                          | Allograft replac 2 coronary a  |
| 79222                          | Allograft replac 3 coronary a  |
| 79223                          | Allograft replac 4+ coronary a |
| 7922y                          | Allograft replac coronary a OS |
| 7922z                          | Allograft replac coronry a NOS |
| 7923.                          | Prosth replac coronary artery  |
| 79230                          | Prosth replac 1 coronary art   |

|       |                                |
|-------|--------------------------------|
| 79231 | Prosth replac 2 coronary art   |
| 79232 | Prosth replac 3 coronary art   |
| 79233 | Prosth replac 4+ coronary art  |
| 7923y | Prosth replac coronary art OS  |
| 7923z | Prosth replac coronary art NOS |
| 7924. | Revision bypass coronary art   |
| 79240 | Revision bypass 1 coronary art |
| 79241 | Revision bypass 2 coronary art |
| 79242 | Revision bypass 3 coronary art |
| 79243 | Revision bypass 4 coronary art |
| 79244 | Rev conn thoracic to coronary  |
| 79245 | Rev implant thorac a in heart  |
| 7924y | Revision bypass coronary a OS  |
| 7924z | Revision bypass coronary a NOS |
| 7925. | Connct mammary to coronary art |
| 79250 | Double anast mamm/coronary art |
| 79251 | Doub implant mamm/coronary art |
| 79252 | Sing anast mamm l ant desc cor |
| 79253 | Single anast mamm/coronary NEC |
| 79254 | Single implant mamm/coronary a |
| 7925y | Connect mammary coronary a OS  |
| 7925z | Connect mammary coronary NOS   |
| 7926. | Connect oth thor art coron art |
| 79260 | Double anast thor/cor art NEC  |
| 79261 | Double implant thor/cor a NEC  |
| 79262 | Single anast thor/cor art NEC  |
| 79263 | Single implant thor/cor a NEC  |
| 7926y | Connect oth thor/coron art OS  |
| 7926z | Connect oth thor/coron art NOS |
| 79275 | Open angioplasty coronary art  |
| 7928. | Translum balloon angiop coro a |
| 79280 | Percut balloon angiopl 1 cor a |
| 79281 | PC balloon angiopl mult cor ar |
| 79282 | PC balloon angiopl cor a graft |
| 79283 | Per tran cut bal angio cor art |
| 7928y | TL balloon angiopl coron a OS  |
| 7928z | TL balloon angiopl coron a NOS |
| 79290 | PC TL laser coronary angioplas |
| 79291 | Streptok PC TL cor thrombolys  |
| 79292 | PC TL inj therap sub cor a NEC |
| 79293 | Rotary coronary angioplasty    |
| 79294 | Insert coronary artery stent   |
| 79295 | Insert drug-elut cor art stent |
| 79296 | Percut translum ather cor art  |
| 792B0 | Endarterectomy coronary a NEC  |
| 792D. | Other bypass coronary artery   |
| 792Dy | Other bypass coronary art OS   |
| 792Dz | Other bypass coronary art NOS  |
| 792E. | Percutan coronary interventn   |
| 792E0 | Emrgncy percut coronry intrvnt |
| 793G. | Perc tran bal ang sten cor art |
| 793G0 | P t ba an in 1-2 dr el st co a |
| 793G1 | P t b an in 3 mo dr el st co a |
| 793G2 | Pe tr bal an in 1-2 ste co art |
| 793G3 | Pe co ba ang 3 mo st co ar NEC |
| 793Gy | OS per tra bal ang ste cor art |
| 793Gz | Per tra bal ang ste cor ar NOS |
| 8B27. | Antianginal therapy            |

|       |                                  |
|-------|----------------------------------|
| 8B3k. | CHD medication review            |
| 8CMP. | Coronary heart disease care plan |
| 8H2V. | Admit isch heart dis emergency   |
| 8IEY. | Rf Ang Pln slf-mgt prg decl'd    |
| 8T04. | Ref Angina Plan self-mgt prg     |
| 9Ob0. | Attends CHD monitoring           |
| 9Ob1. | Refuses CHD monitoring           |
| 9Ob8. | CHD monitoring check done        |
| G3... | Ischaemic heart disease          |
| G30.. | Acute myocardial infarction      |
| G300. | Acute anterolateral infarction   |
| G301. | Anterior myocard. infarct OS     |
| G3010 | Acute anteroapical infarction    |
| G3011 | Acute anteroseptal infarction    |
| G301z | Anterior myocard.infarct NOS     |
| G302. | Acute inferolateral infarction   |
| G303. | Acute inferoposterior infarct    |
| G304. | Posterior myocard.infarct NOS    |
| G305. | Lateral myocardial infarct NOS   |
| G306. | True posterior myocard.infarct   |
| G307. | Acute subendocardial infarct     |
| G3070 | Acute non-Q wave infarction      |
| G3071 | Acute non-ST seg elevation mi    |
| G308. | Inferior myocard. infarct NOS    |
| G309. | Acute Q-wave infarct             |
| G30B. | Acute posterol myocard infarct   |
| G30X. | Ac transmur MI unspec site       |
| G30X0 | Acute ST segment elevation mi    |
| G30y. | Other acute myocardial infarct   |
| G30y0 | Acute atrial infarction          |
| G30y1 | Acute papillary muscle infarct   |
| G30y2 | Acute septal infarction          |
| G30yz | Other acute myocardial inf.NOS   |
| G30z. | Acute myocardial infarct. NOS    |
| G31.. | Other acute/subacute IHD         |
| G311. | Preinfarction syndrome           |
| G3110 | Myocardial infarction aborted    |
| G3111 | Unstable angina                  |
| G3112 | Angina at rest                   |
| G3113 | Refractory angina                |
| G3114 | Worsening angina                 |
| G3115 | Acute coronary syndrome          |
| G311z | Preinfarction syndrome NOS       |
| G312. | Coron thromb/not result in MI    |
| G31y. | Other acute/subacute IHD         |
| G31y0 | Acute coronary insufficiency     |
| G31y1 | Microinfarction of heart         |
| G31y2 | Subendocardial ischaemia         |
| G31y3 | Transient myocardial ischaemia   |
| G31yz | Other acute/subacute IHD NOS     |
| G32.. | Old myocardial infarction        |
| G33.. | Angina pectoris                  |
| G330. | Angina decubitus                 |
| G3300 | Nocturnal angina                 |
| G330z | Angina decubitus NOS             |
| G33z. | Angina pectoris NOS              |
| G33z0 | Status anginosus                 |
| G33z1 | Stenocardia                      |



|                      |                                |
|----------------------|--------------------------------|
| G33z2                | Syncope anginosa               |
| G33z3                | Angina on effort               |
| G33z4                | Ischaemic chest pain           |
| G33z5                | Post infarct angina            |
| G33z6                | New onset angina               |
| G33z7                | Stable angina                  |
| G33zz                | Angina pectoris NOS            |
| G34..                | Other chr.ischaemic heart dis. |
| G340.                | Coronary atherosclerosis       |
| G3400                | Single coronary vessel disease |
| G3401                | Double coronary vessel disease |
| G342.                | Atherosclerotic cardiovasc dis |
| G343.                | Ischaemic cardiomyopathy       |
| G344.                | Silent myocardial ischaemia    |
| G34y.                | Other specif. chronic IHD      |
| G34y0                | Chronic coronary insufficiency |
| G34y1                | Chronic myocardial ischaemia   |
| G34yz                | Other specif.chronic IHD NOS   |
| G34z.                | Other chronic IHD NOS          |
| G34z0                | Asymptomatic CHD               |
| G35..                | Subseqnt myocardial infarction |
| G350.                | Subsqnt myocrd infarc/ant wall |
| G351.                | Subsqnt myocrd infarc/inf wall |
| G353.                | Subseq myo infarct other sites |
| G35X.                | Subseq MI of unspec site       |
| G36..                | Certain curnt comp fol acut MI |
| G360.                | Haempericrd/cur comp fol ac MI |
| G361.                | Atrl sept def/c comp fol ac MI |
| G362.                | Vent sep def/c comp fol ac MI  |
| G363.                | Rup cd w w't h'mpc/cmp f ac MI |
| G364.                | Rp chord tend/c cmp fol ac MI  |
| G365.                | Rp papilr musc/c cmp fol ac MI |
| G366.                | Thrm/atr                       |
| G38..                | Postoperative MI               |
| G380.                | Postop transm MI inf wall      |
| G381.                | Postop transm MI inferior wall |
| G382.                | Postop transm MI other sites   |
| G383.                | Postop transm MI unspec site   |
| G384.                | Postop subendocardial MI       |
| G38z.                | Postop MI                      |
| G39..                | Coronary microvascular disease |
| G3y..                | Ischaemic heart disease OS     |
| G3z..                | Ischaemic heart disease NOS    |
| G501.                | Post infarction pericarditis   |
| Gyu3.                | [X]Ischaemic heart diseases    |
| Gyu30                | [X]Other forms/angina pectoris |
| Gyu31                | [X]Oth curnt comp follw ac MI  |
| Gyu32                | [X]Oth form/ac ischaem hrt dis |
| Gyu33                | [X]O form/chron ischmc hrt dis |
| Gyu34                | [X]Ac transm MI unspec site    |
| Gyu35                | [X]Subseq myocard inf oth site |
| Gyu36                | [X]Subseq MI of unspec site    |
| SP076                | Coronary art bypass graft occl |
| ZV457                | [V]Pres/aortcoronry bypss grft |
| ZV458                | [V]Pres/coron angiopl impl+gft |
| ZV45K                | [V]Pres coron art bypass graft |
| ZV45L                | [V]Stat foll coron angiopl NOS |
| <b>Heart Failure</b> |                                |

|       |                                 |
|-------|---------------------------------|
| 14A6. | H/O: heart failure              |
| 14AM. | H/O:Heart failure in last year  |
| 183B. | Worsening pulmonary oedema      |
| 1O1.. | Heart failure confirmed         |
| 23E1. | O/E - pulmonary oedema          |
| 33BA. | Impaired left ventricular func  |
| 388D. | NYHA classif heart fail symps   |
| 585f. | Echocardiogram shows LVSDf      |
| 585g. | Echocardiogram shows LVDDf      |
| 661M5 | Heart fail slf-manag pln agree  |
| 661N5 | Heart fail self-manag pln revw  |
| 662f. | NYHA classification - class I   |
| 662g. | NYHA classification - class II  |
| 662h. | NYHA classification- class III  |
| 662i. | NYHA classification - class IV  |
| 662p. | Heart failure 6 month review    |
| 662T. | Congestive heart failure monit  |
| 662W. | Heart failure annual review     |
| 679W1 | Educate deterior heart failure  |
| 679X. | Heart failure education         |
| 67D4. | Heart failure info given to pt  |
| 7936J | Imp intr biventric car pace sy  |
| 79379 | Implant bivent card pacemak sy  |
| 8B29. | Cardiac failure therapy         |
| 8CeC. | Pref pl cre nxt exacerbatin HF  |
| 8CL3. | HF care plan discussed with pt  |
| 8CMK. | Has heart failure manage plan   |
| 8CMW8 | Heart failure clinical pathway  |
| 8H2S. | Admit heart failure emergency   |
| 8HBE. | Heart failure follow-up         |
| 8HHb. | Referral to heart failure nurs  |
| 8HHz. | Ref to heart failur exerc prog  |
| 8Hk0. | Refd - heart fail educat group  |
| 8HTL. | Referral heart failure clinic   |
| 8HTLO | Ref rapid access hert fail clnc |
| 8IE0. | Ref heart fail eductn grp dcld  |
| 8IE1. | Ref heart failur exer prog dec  |
| 9hH1. | Ex heart fai qual ind: Inf dis  |
| 9N0k. | Seen in heart failure clinic    |
| 9N2p. | Seen by comm heart failur nurs  |
| 9Or0. | Heart failure review completed  |
| G1yz1 | Rheumatic left ventric.failure  |
| G2101 | Malig.hypert.heart dis.-+ CCF   |
| G2111 | Benign hypert.heart dis.+ CCF   |
| G234. | Hyp ht&ren d+both(con)h&r fail  |
| G58.. | Heart failure                   |
| G580. | Congestive heart failure        |
| G5800 | Acute congestive heart failure  |
| G5801 | Chroncongestive heart failure   |
| G5802 | Decompensated cardiac failure   |
| G5803 | Compensated cardiac failure     |
| G5804 | Cong heart fail due valv dis    |
| G581. | Left ventricular failure        |
| G5810 | Acute left ventricular failure  |
| G582. | Acute heart failure             |
| G583. | Heart failure norm eject frac   |
| G58z. | Heart failure NOS               |
| G5yy9 | Left ventricul systol dysfunc   |

|                      |                                |
|----------------------|--------------------------------|
| G5yyA                | Left ventric diastolic dysfunc |
| G5yyC                | Diastolic dysfunction          |
| G5yyD                | Lft ventr cardiac dysfunction  |
| Q48y1                | Congenital cardiac failure     |
| R2y10                | [D]Cardiorespiratory failure   |
| SP111                | Cardiac insuffic.comp.of care  |
| SP112                | Cardioresp.fail.comp.of care   |
| ZV45M                | [V]Biventric pacemaker in situ |
| <b>Cor pulmonale</b> |                                |
| G400.                | Acute cor pulmonale            |
| G41z.                | Chronic pulmon. heart dis. NOS |
| G584.                | Right ventricular failure      |
| G5yyB                | Right ventric diastol dysfunc  |
| G5yyE                | Rt ventrc systolic dysfunction |
| <b>Hypertension</b>  |                                |
| 6627.                | Good hypertension control      |
| 6628.                | Poor hypertension control      |
| 662b.                | Moderate hypertension control  |
| 662c.                | Hypertension six month review  |
| 662d.                | Hypertension annual review     |
| 662O.                | On treatment for hypertension  |
| 662P0                | Hypertension 9 month review    |
| 8BL0.                | Pt on max tol antihypert ther  |
| G2...                | Hypertensive disease           |
| G20..                | Essential hypertension         |
| G200.                | Malignant essential hypertens. |
| G201.                | Benign essential hypertension  |
| G202.                | Systolic hypertension          |
| G203.                | Diastolic hypertension         |
| G20z.                | Essential hypertension NOS     |
| G21..                | Hypertensive heart disease     |
| G210.                | Malignant hypertens.heart dis. |
| G2100                | Malig.hypert.heart dis.-no CCF |
| G2101                | Malig.hypert.heart dis.-+ CCF  |
| G210z                | Malig.hypertens.heart dis. NOS |
| G211.                | Benign hypertensive heart dis. |
| G2110                | Benign hypert.heart dis-no CCF |
| G2111                | Benign hypert.heart dis+ CCF   |
| G211z                | Benign hypertens.heart dis.NOS |
| G21z.                | Hypertensive heart disease NOS |
| G21z0                | Hypertens.heart dis.NOS-no CCF |
| G21z1                | Hypertens.heart dis.NOS- + CCF |
| G21zz                | Hypertensive heart disease NOS |
| G22..                | Hypertensive renal disease     |
| G220.                | Malignant hypertens.renal dis. |
| G221.                | Benign hypertensive renal dis. |
| G222.                | Hypertens renal dis+renal fail |
| G22z.                | Hypertensive renal disease NOS |
| G23..                | Hypertensive heart+renal dis.  |
| G230.                | Malig.hypert.heart+renal dis.  |
| G231.                | Benign hypert.heart+renal dis. |
| G232.                | Hypert ht&ren d+(congs)ht fail |
| G233.                | Hypertn hrt&ren dis+renal fail |
| G234.                | Hyp ht&ren d+both(con)h&r fail |
| G23z.                | Hypertens.heart+renal dis.NOS  |
| G24..                | Secondary hypertension         |
| G240.                | Secondary malignant hypertens. |
| G2400                | Second.malig.renovasc.hypert.  |

|                        |                                 |
|------------------------|---------------------------------|
| G240z                  | Secondary malign.hypertens.NOS  |
| G241.                  | Secondary benign hypertension   |
| G2410                  | Second.benign renovasc.hypert.  |
| G241z                  | Secondary benign hypertens.NOS  |
| G244.                  | Hypertens 2ndry endocrin disor  |
| G24z.                  | Secondary hypertension NOS      |
| G24z0                  | Secondary renovasc.hypert. NOS  |
| G24zz                  | Secondary hypertension NOS      |
| G25..                  | Stge 1 hypertensin (NICE 2011)  |
| G250.                  | Stage 1 hyp wo ev end org dmge  |
| G251.                  | Stage 1 hyp wi ev end org dmge  |
| G26..                  | Severe hypertensin (NICE 2011)  |
| G27..                  | Hypertnsn resistnt to drg ther  |
| G28..                  | Stge 2 hypertensin (NICE 2011)  |
| G2y..                  | Hypertensive disease OS         |
| G2z..                  | Hypertensive disease NOS        |
| G672.                  | Hypertensive encephalopathy     |
| Gyu2.                  | [X]Hypertensive diseases        |
| Gyu20                  | [X]Oth secondary hypertension   |
| Gyu21                  | [X]Hyperten                     |
| <b>Hyperlipidaemia</b> |                                 |
| 44O4.                  | Serum lipids high               |
| 44P3.                  | Serum cholesterol raised        |
| 44P4.                  | Serum cholesterol very high     |
| 44Q3.                  | Serum triglycerides raised      |
| 662X.                  | Target cholesterol level        |
| 8BAG1                  | Cholesterol red progrm attended |
| 8BAG2                  | Cholesterol red progrm declined |
| 8BL1.                  | Pt on max tol lipid low ther    |
| 8CR3.                  | Hyperlipidaemia clin man plan   |
| 8HT1.                  | Referral to lipid clinic        |
| 9NOI.                  | Seen in lipid clinic            |
| 9NOJ.                  | Seen in cholesterol clinic      |
| 9N4K.                  | DNA cholesterol clinic          |
| 9Oc0.                  | Attns lipid disordr monitring   |
| 9Oc1.                  | Lipid disrdr monitring declind  |
| C320.                  | Pure hypercholesterolaemia      |
| C3200                  | Familial hypercholesterolaemia  |
| C3201                  | Hyperbetalipoproteinaemia       |
| C3202                  | Hyperlipidaemia                 |
| C3203                  | LDL hyperlipoproteinaemia       |
| C3204                  | Fredrickson type IIa lipidaem   |
| C3205                  | Fam defect apolipoprot B-100    |
| C3206                  | Polygenic hypercholesterolemia  |
| C320y                  | Pure hypercholesterolaemia OS   |
| C320z                  | Pure hypercholesterolaemia NOS  |
| C321.                  | Pure hyperglyceridaemia         |
| C3210                  | Hypertriglyceridaemia           |
| C322.                  | Mixed hyperlipidaemia           |
| C3220                  | Familial comb hyperlipidaemia   |
| C323.                  | Hyperchylomicronaemia           |
| C324.                  | Hyperlipidaemia NOS             |
| C325.                  | Lipoprotein deficiencies        |
| C3250                  | High density lipoid deficiency  |
| C3251                  | Hypo-alpha-lipoproteinaemia     |
| C325z                  | Lipoprotein deficiency NOS      |
| C328.                  | Dyslipidaemia                   |
| C329.                  | Hypercholesterolaemia           |

|                                |                                |
|--------------------------------|--------------------------------|
| C32y4                          | Lipase deficiency              |
| Cyu8D                          | [X]Other hyperlipidaemia       |
| <b>Osteoporosis</b>            |                                |
| 58EG.                          | Hip DXA result osteoporotic    |
| 58EM.                          | Lumbar DXA result osteoporotic |
| 58EV.                          | Femor nec DEXA scan osteoporot |
| 66a..                          | Osteoporosis monitoring        |
| 66a2.                          | Osteoporosis treatment started |
| 66a4.                          | Osteoporosis treatment changed |
| 66a5.                          | Osteoporosis - no treatment    |
| 66a6.                          | Osteoporosis - dietary advice  |
| 66a7.                          | Osteoporosis - diet assessment |
| 66a8.                          | Osteoporosis - exercise advice |
| 66a9.                          | Osteoporosis-falls prevention  |
| 66aA.                          | Osteoporosis-treatmnt response |
| 66aB.                          | Osteoporosis-no treat response |
| 9hP1.                          | Exc osteo qual ind: infor diss |
| 9kj0.                          | Bn spr drg trt ofr osteo - ESA |
| 9Od9.                          | Osteoporosis monit check done  |
| N330.                          | Osteoporosis                   |
| N3300                          | Osteoporosis                   |
| N3301                          | Senile osteoporosis            |
| N3302                          | Postmenopausal osteoporosis    |
| N3303                          | Idiopathic osteoporosis        |
| N3304                          | Dissuse osteoporosis           |
| N3305                          | Drug-induced osteoporosis      |
| N3306                          | Postoophorectomy osteoporosis  |
| N3307                          | Postsurg malabsorp osteoporos  |
| N3309                          | Osteopor                       |
| N330A                          | Osteoporosis in endocr disord  |
| N330B                          | Vertebral osteoporosis         |
| N330C                          | Osteoporosis localized spine   |
| N330D                          | Osteoporos due corticosteroid  |
| N330z                          | Osteoporosis NOS               |
| N3312                          | Postoophorc osteopor+path frct |
| N3313                          | Osteopor of disuse + path frct |
| N3314                          | Postsur malab osteop+path frct |
| N3315                          | Drug-ind osteopor + path fract |
| N3316                          | Idiopath osteopor + path fract |
| N3318                          | Osteopor path # lumb vertebrae |
| N3319                          | Osteopor path # thor vertebrae |
| N331A                          | Osteopor path # cerv vertebrae |
| N331B                          | Postmenop osteopor+path fract  |
| N331H                          | Collap cerv vert due to osteop |
| N331J                          | Collap lumb vert due to osteo  |
| N331K                          | Coll thorac vert due osteopor  |
| N331L                          | Collap vert due osteopor NOS   |
| N331M                          | Fragility # unsp osteoporosis  |
| N3746                          | Osteoporotic kyphosis          |
| NyuB0                          | [X]Oth osteoporosis+patholog # |
| NyuB1                          | [X]Other osteoporosis          |
| NyuB2                          | [X]Osteoporosis/oth disords CE |
| NyuB8                          | [X]Unsp osteopor + pathol frac |
| <b>Cerebrovascular disease</b> |                                |
| 14AK.                          | H/O: Stroke in last year       |
| 1M4..                          | Central post-stroke pain       |
| 661M7                          | Stroke self-manage plan agreed |
| 661N7                          | Stroke self-manage plan review |

|       |                                  |
|-------|----------------------------------|
| 662e. | Stroke/CVA annual review         |
| 662M. | Stroke monitoring                |
| 662M1 | Stroke 6 month review            |
| 662M2 | Stroke initial post disch revw   |
| 662o. | Haemorrhagic stroke monitoring   |
| 7P242 | Delivery rehabilitation stroke   |
| 8CRB. | TIA clinical management plan     |
| 8HHM. | Ref to stroke func improv serv   |
| 8IEC. | Ref multidis strk fnc impv dcd   |
| 9h2.. | Except report: stroke qual ind   |
| 9h21. | Except stroke qual ind: Pt uns   |
| 9h22. | Exc stroke qual ind: Infor dis   |
| E004. | Arteriosclerotic dementia        |
| E0040 | Arterioscl.dementia-uncomplic.   |
| E0041 | Arterioscl.dementia+delirium     |
| E0042 | Arterioscl.dementia+paranoia     |
| E0043 | Arterioscl.dementia+depression   |
| E004z | Arteriosclerotic dementia NOS    |
| Eu01. | [X]Vascular dementia             |
| Eu010 | [X]Vascular dement acute onset   |
| Eu011 | [X]Multi-infarct dementia        |
| Eu012 | [X]Subcortical vascular dement   |
| Eu013 | [X]Mix cort/subcor vasc dement   |
| Eu01y | [X]Other vascular dementia       |
| Eu01z | [X]Vascular dementia unspecif    |
| F11x2 | Cerebral degen cerebrovasc dis   |
| Fyu55 | [X]Oth cerebral TIA's+rel synd   |
| Fyu57 | [X]O vasc syn/brain cer vasc d   |
| G6... | Cerebrovascular disease          |
| G61.. | Intracerebral haemorrhage        |
| G610. | Cortical haemorrhage             |
| G611. | Internal capsule haemorrhage     |
| G612. | Basal nucleus haemorrhage        |
| G613. | Cerebellar haemorrhage           |
| G614. | Pontine haemorrhage              |
| G615. | Bulbar haemorrhage               |
| G616. | External capsule haemorrhage     |
| G618. | Intracerebrl haem                |
| G619. | Lobar cerebral haemorrhage       |
| G61X. | Intracerebr haem hemisph         |
| G61X0 | Left side intracerebr haem unsp  |
| G61X1 | Right side intracerebr haem unsp |
| G61z. | Intracerebral haemorrhage NOS    |
| G63.. | Precerebral arterial occlusion   |
| G630. | Basilar artery occlusion         |
| G631. | Carotid artery occlusion         |
| G632. | Vertebral artery occlusion       |
| G633. | Multip/bilat.precerebr.art.occ.  |
| G634. | Carotid artery stenosis          |
| G63y. | Other precerebral artery occl.   |
| G63y0 | Cerebr infct/throm/precere art   |
| G63y1 | Cerebr infct/embol/precere art   |
| G63z. | Precerebral artery occlus. NOS   |
| G64.. | Cerebral arterial occlusion      |
| G640. | Cerebral thrombosis              |
| G6400 | Cerebr infct/throm/cerebrl art   |
| G641. | Cerebral embolism                |
| G6410 | Cerebr infct/embol/cerebrl art   |

|       |                                |
|-------|--------------------------------|
| G64z. | Cerebral infarction NOS        |
| G64z0 | Brainstem infarction           |
| G64z1 | Wallenberg syndrome            |
| G64z2 | Left sided cerebral infarction |
| G64z3 | Right sided cerebral infarct   |
| G64z4 | Infarction of basal ganglia    |
| G65.. | Transient cerebral ischaemia   |
| G650. | Basilar artery syndrome        |
| G651. | Vertebral artery syndrome      |
| G6510 | Vertebro-basilar artery syndrm |
| G653. | Carotid artery syn hemispheric |
| G654. | Multi&bilat precerebrl art syn |
| G656. | Vertebrobasilar insufficiency  |
| G657. | Carotid terr trans ischaem att |
| G65y. | Other transient cerebral isch. |
| G65z. | Transient cerebral ischaem.NOS |
| G65z0 | Impending CVA                  |
| G65z1 | Intermittent CVA               |
| G65zz | Transient cerebral ischaem.NOS |
| G66.. | Stroke/CVA unspecified         |
| G660. | Middle cerebral artery syndrm  |
| G661. | Anterior cerebral artery syn   |
| G662. | Posterior cerebral artery syn  |
| G663. | Brain stem stroke syndrome     |
| G664. | Cerebellar stroke syndrome     |
| G665. | Pure motor lacunar syndrome    |
| G666. | Pure sensory lacunar syndrome  |
| G667. | Left sided CVA                 |
| G668. | Right sided CVA                |
| G67.. | Other cerebrovascular disease  |
| G670. | Cerebral atherosclerosis       |
| G671. | Generalised isch.CV dis.NOS    |
| G6710 | Acute cerebrovasc.insuffic.NOS |
| G6711 | Chronic cerebral ischaemia     |
| G671z | Generalised isch.CV dis.NOS    |
| G677. | Oc/st cere art                 |
| G6770 | Occlusn+stenos/midl cerebr art |
| G6771 | Occlusn+stenos/anter cereb art |
| G6772 | Occlusn+stenos/post cerebr art |
| G6773 | Occlusn+stenos/cerebellar art  |
| G6774 | Occl/sten/mult+bilat cereb art |
| G679. | Small vessel cerebrovas diseas |
| G67B. | Revrsb cerbrl vascnstrtn syndr |
| G67y. | Other cerebrovascular dis OS   |
| G67z. | Other cerebrovasc.disease NOS  |
| G68.. | Cerebrovasc.dis.-late effects  |
| G682. | Seq/oth nontraum intrcran haem |
| G683. | Sequela/cerebral infarction    |
| G68W. | Seq/o+unspcf cerebrovasc dis   |
| G68X. | Seq/strok                      |
| G6W.. | Cer inf                        |
| G6X.. | Cereb in/uns oc                |
| G6y.. | Cerebrovascular disease OS     |
| G6z.. | Cerebrovascular disease NOS    |
| G70y0 | Carotid artery atherosclerosis |
| Gyu6. | [X]Cerebrovascular diseases    |
| Gyu63 | [X]Cereb in/uns oc             |
| Gyu64 | [X]Other cerebral infarction   |

|                 |                                  |
|-----------------|----------------------------------|
| Gyu65           | [X]Oc+steno/o precerebral artr   |
| Gyu66           | [X]Oc+sten/o cerebral arteries   |
| Gyu67           | [X]Other spcfd cerebrovasc dis   |
| Gyu6A           | [X]Oth cerebrovasc diso/dis CE   |
| Gyu6B           | [X]Seq/o n-traum intracr n h'm   |
| Gyu6C           | [X]Seq/strok                     |
| Gyu6D           | [X]Seq/o+unspcf cerebrovasc dis  |
| Gyu6G           | [X]Cer inf                       |
| ZV12D           | [V]Pers hist trans isch attack   |
| <b>Dementia</b> |                                  |
| 1461.           | H/O: dementia                    |
| 3AE3.           | GDS level 4 - mod cog dec        |
| 3AE4.           | GDS level 5 - mod sev cog dec    |
| 3AE5.           | GDS level 6 - severe cog dec     |
| 3AE6.           | GDS level 7 - very sev cog dec   |
| 66h..           | Dementia monitoring              |
| 6AB..           | Dementia annual review           |
| 8BPa.           | Antipsyc drug therapy dementia   |
| 8CMG2           | Review dementia adv care plan    |
| 8CMZ.           | Dementia care plan               |
| 8CSA.           | Dementia advnce cre pln agreed   |
| 8Hla.           | Referral dementia care advisor   |
| 8IAe0           | Dementia adv care plan declnd    |
| 9hD..           | Excep report: demen qual indic   |
| 9hD0.           | Exc demen qual ind: Pat unsuit   |
| 9hD1.           | Exc demen qual ind: Inform dis   |
| E000.           | Senile dementia-uncomplicated    |
| E001.           | Presenile dementia               |
| E0010           | Presenile dementia - uncomplic   |
| E0011           | Presenile dementia + delirium    |
| E0012           | Presenile dementia + paranoia    |
| E0013           | Presenile dementia+depression    |
| E001z           | Presenile dementia NOS           |
| E002.           | Sen.dement.-depressed/paranoid   |
| E0020           | Senile dementia + paranoia       |
| E0021           | Senile dementia + depression     |
| E002z           | Sen.dement.-depr./paranoid NOS   |
| E003.           | Senile dementia + delirium       |
| E004.           | Arteriosclerotic dementia        |
| E0040           | Arterioscl.dementia-uncomplic.   |
| E0041           | Arterioscl.dementia+delirium     |
| E0042           | Arterioscl.dementia+paranoia     |
| E0043           | Arterioscl.dementia+depression   |
| E004z           | Arteriosclerotic dementia NOS    |
| E012.           | Other alcoholic dementia         |
| E02y1           | Drug-induced dementia            |
| E041.           | Dementia in conditions EC        |
| Eu00.           | [X]Dementia in Alzheimer's       |
| Eu000           | [X]Early onset Alzheimer dement  |
| Eu001           | [X]Late onset Alzheimer dementia |
| Eu002           | [X]Atypical/mixed Alzheimer's    |
| Eu00z           | [X]Alzheimer's disease unspec    |
| Eu01.           | [X]Vascular dementia             |
| Eu010           | [X]Vascular dement acute onset   |
| Eu011           | [X]Multi-infarct dementia        |
| Eu012           | [X]Subcortical vascular dement   |
| Eu013           | [X]Mix cort/subcor vasc dement   |
| Eu01y           | [X]Other vascular dementia       |



|                                          |                                                                   |
|------------------------------------------|-------------------------------------------------------------------|
| Eu01z                                    | [X]Vascular dementia unspecif                                     |
| Eu02.                                    | [X]Dementia in disease EC                                         |
| Eu020                                    | [X]Dementia in Pick's disease                                     |
| Eu021                                    | [X]Dement in Creutzfeld-Jakob                                     |
| Eu022                                    | [X]Dementia in Huntington's                                       |
| Eu023                                    | [X]Dementia in Parkinson's                                        |
| Eu024                                    | [X]Dementia in HIV disease                                        |
| Eu025                                    | [X]Lewy body dementia                                             |
| Eu02y                                    | [X]Dement                                                         |
| Eu02z                                    | [X] Unspecified dementia                                          |
| Eu041                                    | [X]Delirium superimp dementia                                     |
| Eu107                                    | [X]Resid psychotic due alcohol                                    |
| F110.                                    | Alzheimer's disease                                               |
| F1100                                    | Alzheimer dis wth early onset                                     |
| F1101                                    | Alzheimer's dis wth late onset                                    |
| F111.                                    | Pick's disease                                                    |
| F112.                                    | Senile degeneration of brain                                      |
| F116.                                    | Lewy body disease                                                 |
| F11x7                                    | Cerebral degen.-Jakob-Creutzf.                                    |
| Fyu30                                    | [X]Other Alzheimer's disease                                      |
| AROR23861NEMIS                           | Aricept Evers Orodispersible tablets 5 mg                         |
| AROR23862NEMIS                           | Aricept Evers Orodispersible tablets 10 mg                        |
| ARTA30542EMIS                            | Aricept Tablets 10 mg                                             |
| ARTA30543EMIS                            | Aricept Tablets 5 mg                                              |
| DOOR23858NEMIS                           | Donepezil Hydrochloride Orodispersible Tablets (Sugar Free) 5 mg  |
| DOOR23859NEMIS                           | Donepezil Hydrochloride Orodispersible Tablets (Sugar Free) 10 mg |
| DOTA30546EMIS                            | Donepezil Hydrochloride Tablets 10 mg                             |
| DOTA30547EMIS                            | Donepezil Hydrochloride Tablets 5 mg                              |
| dy1..                                    | DONEPEZIL HYDROCHLORIDE                                           |
| dy11.                                    | DONEPEZIL HYDROCHLORIDE 5mg tablets                               |
| dy12.                                    | DONEPEZIL HYDROCHLORIDE 10mg tablets                              |
| dy13.                                    | ARICEPT 5mg tablets                                               |
| dy14.                                    | ARICEPT 10mg tablets                                              |
| dy15.                                    | ARICEPT EVESS 5mg disp tabs                                       |
| dy16.                                    | ARICEPT EVESS 10mg disp tabs                                      |
| dy1y.                                    | DONEPEZIL HYDROCHLORIDE 10mg disp tabs                            |
| dy1z.                                    | DONEPEZIL HYDROCHLORIDE 5mg disp tabs                             |
| <b>Gastro Oesophageal Reflux Disease</b> |                                                                   |
| 171J.                                    | Reflux cough                                                      |
| 1952.                                    | Regurgitates food                                                 |
| 1953.                                    | Waterbrash                                                        |
| 1957.                                    | Gastric reflux                                                    |
| 760L.                                    | Antireflux operations                                             |
| 760L0                                    | Antireflux fundoplic thor appr                                    |
| 760L1                                    | Antireflux op thorac appr NEC                                     |
| 760L2                                    | Antireflux fundoplic abd appr                                     |
| 760L3                                    | Antireflux gastropexy                                             |
| 760L4                                    | Antireflux proc & gastropi HFQ                                    |
| 760L5                                    | Insertion Angelchick prosthes                                     |
| 760L6                                    | Oesophagogastric fundoplasty                                      |
| 760L7                                    | Endo Nissen fund thoracic appr                                    |
| 760L8                                    | Lap Nissen fundoplic abdo appr                                    |
| 760Ly                                    | Antireflux operation OS                                           |
| 760Lz                                    | Antireflux operation NOS                                          |
| 760M.                                    | Revision antireflux operations                                    |
| 760M0                                    | Revision fundoplication stom                                      |
| 760M1                                    | Adjustment Angelchick prosthes                                    |
| 760M2                                    | Removal Angelchick prosthesis                                     |

|                                    |                                 |
|------------------------------------|---------------------------------|
| 760My                              | Revision antireflux op OS       |
| 760Mz                              | Revision antireflux op NOS      |
| J1011                              | Reflux oesophagitis             |
| J1020                              | Peptic ulcer of oesophagus      |
| J1025                              | Barrett's ulcer of oesophagus   |
| J1034                              | Peptic stricture of oesophagus  |
| J10y4                              | Oesoph reflux no oesophagitis   |
| J10y5                              | Laryngopharyngeal reflux        |
| J10y6                              | Barrett's oesophagus            |
| R0711                              | [D]Waterbrash                   |
| <b>Peripheral Vascular Disease</b> |                                 |
| 14F7.                              | H/O: arterial lower limb ulcer  |
| 1M110                              | Ischaemic foot pain at rest     |
| 1M111                              | Ischaemic ft pain when walking  |
| 2G63.                              | Ischaemic toe                   |
| 662U.                              | Periph vasc disease monitoring  |
| 7A121                              | Bypass bifurc anast fem a NEC   |
| 7A123                              | Bypass bifurc anastom iliac a   |
| 7A41.                              | Other bypass of iliac artery    |
| 7A411                              | Bypass iliac anast il/fem NEC   |
| 7A413                              | Bypass iliac anast fem/fem NEC  |
| 7A419                              | By comm iliac anast aort/c il   |
| 7A41A                              | Byp iliac art anast aort/ex il  |
| 7A41B                              | Byp leg art anast aorta/c fem   |
| 7A41C                              | Byp leg art anast aorta/d fem   |
| 7A41D                              | Byp iliac art anast il/il NEC   |
| 7A41E                              | Em bypass iliac art-unsp anast  |
| 7A41F                              | Ilio-fem prosth X-over graft    |
| 7A41y                              | Other bypass of iliac art OS    |
| 7A41z                              | Other bypass of iliac art NOS   |
| 7A420                              | Endarterect patch rep iliac art |
| 7A421                              | Endarterectomy iliac art NEC    |
| 7A431                              | Open embolectomy iliac artery   |
| 7A433                              | Open insert iliac artery stent  |
| 7A44.                              | Transluminal ops on iliac art   |
| 7A440                              | PC transl angioplasty iliac a   |
| 7A441                              | PC transl embolectomy iliac a   |
| 7A443                              | Insertion iliac artery stent    |
| 7A444                              | Per trans ins iliac art stent   |
| 7A44y                              | Transluminal op iliac art OS    |
| 7A44z                              | Transluminal op iliac art NOS   |
| 7A48.                              | Oth bypass femoral/poplit art   |
| 7A480                              | Bypass fem art pr anas/pop NEC  |
| 7A481                              | Bypass pop art pr anas/pop NEC  |
| 7A482                              | Bypass fem art vein gr/pop NEC  |
| 7A483                              | Bypass pop art vein gr/pop NEC  |
| 7A484                              | Bypass fem art pr anas/tib NEC  |
| 7A485                              | Bypass pop art pr anas/tib NEC  |
| 7A486                              | Bypass fem art vein gr/tib NEC  |
| 7A487                              | Bypass pop art vein gr/tib NEC  |
| 7A488                              | Bypass fem art pr anas/per NEC  |
| 7A489                              | Bypass pop art pr anas/per NEC  |
| 7A48A                              | Bypass fem art vein gr/per NEC  |
| 7A48B                              | Bypass pop art vein gr/per NEC  |
| 7A48C                              | Byp fem art anast fem/fem NEC   |
| 7A48D                              | Byp pop art anast pop/fem NEC   |
| 7A48E                              | Fem-fem prosth X-over graft     |
| 7A48y                              | Other bypass fem/poplit art OS  |

|       |                                |
|-------|--------------------------------|
| 7A48z | Oth bypass fem/pop artery NOS  |
| 7A49. | Reconstruction fem/pop artery  |
| 7A490 | Endarterect patch rep feml art |
| 7A491 | Endarterect patch rep popl art |
| 7A492 | Endarterect femoral artery NEC |
| 7A493 | Endarterect poplit artery NEC  |
| 7A494 | Profundoplast patch rep fem a  |
| 7A495 | Profundoplast patch rep popl a |
| 7A496 | Profundoplasty femoral art NEC |
| 7A497 | Profundoplasty poplit art NEC  |
| 7A498 | Recon femoral artery vein graf |
| 7A499 | Recon popliteal art vein graft |
| 7A49y | Reconstruction fem/pop art OS  |
| 7A49z | Reconstruction fem/pop art NOS |
| 7A4A2 | Open embolectomy femoral art   |
| 7A4A3 | Open embolectomy popliteal art |
| 7A4B. | Translum ops fem/poplit artery |
| 7A4B0 | PC TL angioplasty femoral art  |
| 7A4B1 | PC TL angioplasty poplit art   |
| 7A4B2 | PC TL embolectomy femoral art  |
| 7A4B3 | PC TL embolectomy poplit art   |
| 7A4B8 | PC TL thromb fem gr streptokin |
| 7A4B9 | Perc trans ins stent fem art   |
| 7A4By | Translum op fem/poplit art OS  |
| 7A4Bz | Translum op fem/poplit art NOS |
| 9hS1. | Ex f pr art dis qu ind inf dis |
| C107. | Diab.mell.+periph.circul.dis   |
| C1070 | Diab.+periph.circ.dis-juvenile |
| C1071 | Diab.+periph.circ.dis.-adult   |
| C1072 | Diabetic gangrene - adult      |
| C1073 | IDDM periph circulatory disord |
| C1074 | NIDDM periph circulat disord   |
| C107y | Oth spcf diab mel+per circ cmp |
| C107z | Diab.+periph.circ.disease NOS  |
| C1086 | Insulin depen diab mel+gangren |
| C108G | IDDM with peripheral angiopath |
| C1095 | Non-insulin dep diab mell+gang |
| C109F | NIDDM with periph angiopath    |
| C10A5 | Malnut-rlt diab mel+per circ c |
| C10E6 | Type 1 diab mell with gangrene |
| C10EG | Type 1 diab mell+periph angiop |
| C10F5 | Type 2 diab mell + gangrene    |
| C10FF | Type 2 diab mell+periph angiop |
| G702. | Extremity artery atheroma      |
| G702z | Extremity artery atheroma NOS  |
| G73.. | Other peripheral vascular dis. |
| G731. | Thromboangiitis obliterans     |
| G7310 | Buerger's disease              |
| G7311 | Presenile gangrene             |
| G731z | Thromboangiitis obliterans NOS |
| G732. | Peripheral gangrene            |
| G7320 | Gangrene of toe                |
| G7321 | Gangrene of foot               |
| G733. | Ischaemic foot                 |
| G734. | Peripheral arterial disease    |
| G73y. | Other spec.periph.vasc.disease |
| G73y0 | Diabetic peripheral angiopathy |
| G73y1 | Periph.angiopathy              |

|                                  |                                |
|----------------------------------|--------------------------------|
| G73yz                            | Other spec.periph.vasc.dis.NOS |
| G73z.                            | Peripheral vascular dis. NOS   |
| G73z0                            | Intermittent claudication      |
| G73zz                            | Peripheral vasc.disease NOS    |
| G7424                            | Embolus/thrombus femoral art.  |
| G7425                            | Embolus/thromb.popliteal art.  |
| G7426                            | Embolus/thromb.ant.tibial art. |
| G7427                            | Embolus/thromb.dors.pedis art. |
| G7428                            | Embolus/thromb.post.tibial art |
| G7429                            | Embolus/thromb.leg artery NOS  |
| G74y0                            | Embolus/thromb.com.iliac art.  |
| G74y1                            | Embolus/thromb.int.iliac art.  |
| G74y2                            | Embolus/thromb.ext.iliac art.  |
| G74y3                            | Embolus/thromb iliac art.unsp. |
| G76z0                            | Iliac artery occlusion         |
| G76z1                            | Femoral artery occlusion       |
| G76z2                            | Popliteal artery occlusion     |
| G784.                            | Occlusion of artery lower limb |
| G7840                            | Occlusn dorsalis pedis artery  |
| G7841                            | Occlusn anterior tibial artery |
| G7842                            | Occlusn posterior tibial artry |
| Gyu74                            | [X]Oth spcf periph vasculr dis |
| M2710                            | Ischaemic ulcer diabetic foot  |
| M2713                            | Arterial leg ulcer             |
| M2714                            | Mixed venous+artery leg ulcer  |
| R0542                            | [D]Gangrene of toe in diabetic |
| R0543                            | [D]Widespread diab foot gangr  |
| <b>Connective Tissue Disease</b> |                                |
| 66c0.                            | DMARD monitoring               |
| 66HB0                            | Rheumatoid arthritis annul rev |
| 7P203                            | Del rehab rheumatoid arthritis |
| 9hR1.                            | Ex rheum arth qua ind: inf dis |
| 9kN..                            | DMARD monitor - enh serv admin |
| 9kN0.                            | Pt DMARD rec iss - enh ser adm |
| 9kN1.                            | Date DMARD mon ap - enh ser ad |
| 9kN2.                            | Pt DMARD rec upd - enh ser adm |
| 9kN4.                            | Pt DMARD recor chec - en se ad |
| 9kN5.                            | DMARD mn rf bk sc cr - en se a |
| 9kN6.                            | DMARD monitor prmry care - ESA |
| 9kN7.                            | DMARD monitor secnd care - ESA |
| 9kN8.                            | DMARD therapy initiated        |
| 9NiK.                            | DNA hospital DMARD monitor clc |
| 9NiL.                            | DNA GP DMARD monitoring clinic |
| 9NkF.                            | Seen in GP DMARD monitor clinc |
| 9NkG.                            | Seen in com DMARD monitor clnc |
| 9NkH.                            | Seen in hosp DMARD monitr clnc |
| 9Oe0.                            | Community DMARD monitor appt   |
| 9Oe3.                            | DNA community DMARD monitoring |
| 9Oe4.                            | Co DMARD mo record retrn to pt |
| F3712                            | Polyneuropathy+rheumatoid arth |
| F3964                            | Myopathy+rheumatoid arthritis  |
| F3966                            | Myopathy + scleroderma         |
| F3967                            | Myopathy + Sjogren's disease   |
| G5y8.                            | Rheumatoid myocarditis         |
| G5yA.                            | Rheumatoid carditis            |
| H570.                            | Rheumatoid lung                |
| H572.                            | Lung dis.+ systemic sclerosis  |
| H57y1                            | Lung dis.+ polymyositis        |

|       |                                |
|-------|--------------------------------|
| H57y3 | Lung dis.+ Sjogren's disease   |
| H57y4 | Lung disease + SLE             |
| H58y7 | Interst lung dis conn tiss dis |
| K01x4 | Nephrotic syndrome + SLE       |
| K0B4. | Ren tb-in ds/sys con tis ds    |
| K0B40 | Renal tubul-interstit dis SLE  |
| N00.. | Diffuse connective tissue dis. |
| N000. | Systemic lupus erythematosus   |
| N0000 | Disseminated lupus erythemat.  |
| N0003 | Syst lup eryth + organ/sys inv |
| N0004 | SLE with pericarditis          |
| N0006 | Cerebral lupus                 |
| N000z | Systemic lupus erythematos.NOS |
| N001. | Scleroderma                    |
| N0010 | Progressive systemic sclerosis |
| N0011 | CREST syndrome                 |
| N002. | Sicca (Sjogren's) syndrome     |
| N003. | Dermatomyositis                |
| N003X | Dermatopolymyositis            |
| N004. | Polymyositis                   |
| N04.. | Rheumatoid arthritis+similar   |
| N040. | Rheumatoid arthritis           |
| N0400 | Rheumatoid arthritis-Cx spine  |
| N0401 | Oth rheumatoid arthritis-spine |
| N0402 | Rheumatoid arthritis-shoulder  |
| N0403 | Rheumatoid arthr-sternoclav jt |
| N0404 | Rheumatoid arthr-acromioclav j |
| N0405 | Rheumatoid arthritis of elbow  |
| N0406 | Rheumatoid arthritis-dist RUJ  |
| N0407 | Rheumatoid arthritis of wrist  |
| N0408 | Rheumatoid arthritis-MCP joint |
| N0409 | Rheumatoid arthritis-PIPJ-fing |
| N040A | Rheumatoid arthritis-DIPJ-fing |
| N040B | Rheumatoid arthritis of hip    |
| N040C | Rheumatoid arthritis of SIJ    |
| N040D | Rheumatoid arthritis of knee   |
| N040E | Rheumatoid arthr of tib-fib jt |
| N040F | Rheumatoid arthritis of ankle  |
| N040G | Rheumatoid arthr-subtalar jnt  |
| N040H | Rheumatoid arthr-talonav joint |
| N040J | Rheumatoid arthr-oth tarsal jt |
| N040K | Rheumatoid arthr-1st MTP joint |
| N040L | Rheumatoid arthr-lesser MTP jt |
| N040M | Rheumatoid arthr-IP joint-toe  |
| N040N | Rheumatoid vasculitis          |
| N040P | Seronegative rheumat arthritis |
| N040Q | Rheumatoid bursitis            |
| N040S | Rheumat arthr - multiple joint |
| N040T | Flare of rheumatoid arthritis  |
| N041. | Felty's syndrome               |
| N042. | Other rh.arthr.+visc/syst.dis. |
| N0421 | Rheumatoid lung disease        |
| N042z | Rh.arthr.+visc/syst.dis.NOS    |
| N047. | Seropositive erosive RA        |
| N04X. | Seroposit rheum arthr          |
| N04y0 | Rheumatoid lung                |
| N2334 | Antisynthetase syndrome        |
| N33z5 | Relapsing polychondritis       |

|                           |                                  |
|---------------------------|----------------------------------|
| Nyu10                     | [X]Rheum arthrit+inv/o org/sys   |
| Nyu11                     | [X]O sero+ve rheumat arthritis   |
| Nyu12                     | [X]Oth spcf rheumatd arthritis   |
| Nyu1G                     | [X]Seroposit rheum arthr         |
| Nyu4.                     | [X]Systemc connctv tis disorders |
| Nyu43                     | [X]Oth forms/sys lup erythemat   |
| Nyu44                     | [X]Other dermatomyositis         |
| Nyu45                     | [X]Oth forms/systemc sclerosis   |
| Nyu46                     | [X]Other overlap syndromes       |
| Nyu47                     | [X]Oth syst dis/connctv tissue   |
| Nyu48                     | [X]Dermat(poly)myosit/neo d CE   |
| Nyu4C                     | [X]Sys diso/connctv t/o dis CE   |
| Nyu4E                     | [X]Dermatopolymyositis           |
| Nyu4F                     | [X]Mixed connect tiss disease    |
| <b>Anxiety/Depression</b> |                                  |
| 1465.                     | H/O: depression                  |
| 1466.                     | H/O: anxiety state               |
| 173f.                     | Anxiety about breathlessness     |
| 1B13.                     | Anxiousness                      |
| 1B17.                     | Depressed                        |
| 1B1U.                     | Symptoms of depression           |
| 1B1V.                     | C/O - panic attack               |
| 1BT..                     | Depressed mood                   |
| 1JJ..                     | Suspected depression             |
| 212S.                     | Depression resolved              |
| 2257.                     | O/E - depressed                  |
| 38Dp.                     | HAMD-Hamil rating scal depress   |
| 62T1.                     | Puerperal depression             |
| 66590                     | Antidepress drug treat started   |
| 6G00.                     | Postnatal depression counsel     |
| 8BK0.                     | Depression management program    |
| 8CAa.                     | Pt given adv manag depression    |
| 8G94.                     | Anxiety management training      |
| 8HHp.                     | Ref guid self-help for anxiety   |
| 8HHq.                     | Ref guid self-help for depress   |
| 9H90.                     | Depression annual review         |
| 9H91.                     | Depression medication review     |
| 9H92.                     | Depression interim review        |
| 9HA0.                     | On depression register           |
| 9hC1.                     | Exc depressi qual ind: Inf dis   |
| 9k4..                     | Depression - enhanc ser admin    |
| 9k40.                     | Depression - enh serv complete   |
| 9kQ..                     | On fl ds lg trt dep - en se ad   |
| E0013                     | Presenile dementia+depression    |
| E002.                     | Sen.dement.-depressed/paranoid   |
| E0021                     | Senile dementia + depression     |
| E0043                     | Arterioscl.dementia+depression   |
| E02y3                     | Drug-induced depressive state    |
| E11..                     | Affective psychoses              |
| E112.                     | Single major depressive episod   |
| E1120                     | Single major depression-unspec   |
| E1121                     | Single major depression-mild     |
| E1122                     | Single major depress.-moderate   |
| E1123                     | Single major depression-severe   |
| E1124                     | Single maj.depress.severe+psyc   |
| E1125                     | Single maj.depress.-part remiss  |
| E1126                     | Single maj.depress.-full remiss  |
| E112z                     | Single major depression NOS      |

|       |                                |
|-------|--------------------------------|
| E113. | Recurrent major depressive epi |
| E1130 | Recurr.major depression-unspec |
| E1131 | Recurr.major depression-mild   |
| E1132 | Recurr.major depress.-moderate |
| E1133 | Recurr.major depression-severe |
| E1134 | Recurr.maj.depres.-severe+psyc |
| E1135 | Recurr.maj.depres.-part remiss |
| E1136 | Recurr.maj.depres.-full remiss |
| E1137 | Recurrent depression           |
| E113z | Recurr. major depression NOS   |
| E114. | Bipolar affective - now manic  |
| E1140 | Manic bipolar affective-unspec |
| E1141 | Manic bipolar affective-mild   |
| E1142 | Manic bipolar affect.-moderate |
| E1143 | Manic bipolar affect.-severe   |
| E1144 | Manic bipol.affect.severe+psyc |
| E1145 | Manic bipol.affect.part remiss |
| E1146 | Manic bipol.affect.full remiss |
| E114z | Manic bipolar affective NOS    |
| E115. | Bipolar affective - now depres |
| E1150 | Depressed bipolar affect.-unsp |
| E1151 | Depress.bipolar affect.-mild   |
| E1152 | Depr.bipolar affect.-moderate  |
| E1153 | Depr.bipolar affect.-severe    |
| E1154 | Depr.bipol.affect.-severe+psyc |
| E1155 | Depr.bipol.affect.-part remiss |
| E1156 | Depr.bipol.affect.-full remiss |
| E115z | Depressed bipolar affect. NOS  |
| E116. | Mixed bipolar affective disord |
| E1160 | Mixed bipolar affective-unspec |
| E1161 | Mixed bipolar affective-mild   |
| E1162 | Mixed bipolar affect.-moderate |
| E1163 | Mixed bipolar affect.-severe   |
| E1164 | Mixed bipol.affect.severe+psyc |
| E1165 | Mixed bipol.affect.part remiss |
| E1166 | Mixed bipol.affect.full remiss |
| E116z | Mixed bipolar affective NOS    |
| E117. | Unspec bipolar affect disord   |
| E1170 | Unspecified bipolar affective  |
| E1171 | Unsp.bipolar affective-mild    |
| E1172 | Unsp.bipolar affect.-moderate  |
| E1173 | Unsp.bipolar affect.-severe    |
| E1174 | Unsp.bipol.affect.-severe+psyc |
| E1175 | Unsp.bipol.affect.-part remiss |
| E1176 | Unsp.bipol.affect.-full remiss |
| E117z | Unspecif.bipolar affective NOS |
| E118. | Seasonal affective disorder    |
| E11y. | Other manic-depressive psychos |
| E11y0 | Unspec manic-depressive psycho |
| E11y2 | Atypical depressive disorder   |
| E11y3 | Other mixed manic-depres psych |
| E11z2 | Masked depression              |
| E130. | Reactive depressive psychosis  |
| E135. | Agitated depression            |
| E200. | Anxiety states                 |
| E2000 | Anxiety state unspecified      |
| E2001 | Panic disorder                 |
| E2002 | Generalised anxiety disorder   |

|       |                                 |
|-------|---------------------------------|
| E2003 | Anxiety with depression         |
| E2004 | Chronic anxiety                 |
| E2005 | Recurrent anxiety               |
| E200z | Anxiety state NOS               |
| E202. | Phobic disorders                |
| E204. | Neurotic (reactive) depression  |
| E2112 | Depressive personality disord   |
| E290. | Brief depressive reaction       |
| E290z | Brief depressive reaction NOS   |
| E291. | Prolonged depressive reaction   |
| E2B.. | Depressive disorder NEC         |
| E2B1. | Chronic depression              |
| E2D0. | Anxiety/fear child/adoles.dis.  |
| E2D00 | Child/adolesc.overanxious.dis.  |
| E2D01 | Child/adolesc.fearfulness dis.  |
| E2D0z | Anxiety/fear child/adolesc.NOS  |
| Eu054 | [X]Organic anxiety disorder     |
| Eu204 | [X]Post-schizophrenic depressn  |
| Eu251 | [X]Schzaffctve dis depres type  |
| Eu31. | [X]Bipolar affective disorder   |
| Eu310 | [X]Bipol affec current hypoman  |
| Eu311 | [X]Bipol aff                    |
| Eu312 | [X]Bipol affect manic+psychos   |
| Eu313 | [X]Bipol aff mild/mod depress   |
| Eu314 | [X]Bipol AD                     |
| Eu315 | [X]Bipol aff sev depress/psych  |
| Eu316 | [X]Bipol affective dis          |
| Eu317 | [X]Bipol affect dis remission   |
| Eu318 | [X]Bipol affect disord type I   |
| Eu319 | [X]Bipol affect disord type II  |
| Eu31y | [X]Oth bipolar affective disord |
| Eu32. | [X]Depressive episode           |
| Eu320 | [X]Mild depressive episode      |
| Eu321 | [X]Moderate depressive episode  |
| Eu322 | [X]Severe depressiv no psychot  |
| Eu323 | [X]Severe depressive + psychot  |
| Eu324 | [X]Mild depression              |
| Eu325 | [X]Major depression             |
| Eu326 | [X]Major depression             |
| Eu327 | [X]Maj dep                      |
| Eu328 | [X]Maj dep                      |
| Eu329 | [X]Sin ma dep ep sev ps ps rem  |
| Eu32A | [X]Rec ma dep ep sev ps ps rem  |
| Eu32B | [X]Antenatal depression         |
| Eu32y | [X]Other depressive episodes    |
| Eu32z | [X]Depressive episode           |
| Eu33. | [X]Recurrent depressive disord  |
| Eu330 | [X]Recurr depress current mild  |
| Eu331 | [X]Recurr depress current mod   |
| Eu332 | [X]Recurr dep now sever no psy  |
| Eu333 | [X]Recurr dep now sever+psych   |
| Eu334 | [X]Recurr depress in remission  |
| Eu33y | [X]Oth recurr depressive disord |
| Eu33z | [X]Recurrent depress dis unsp   |
| Eu341 | [X]Dysthymia                    |
| Eu3y1 | [X]Oth recurr mood affect dis   |
| Eu40. | [X]Phobic anxiety disorders     |
| Eu40y | [X]Other phobic anxiety disord  |



|                               |                                |
|-------------------------------|--------------------------------|
| Eu40z                         | [X]Phobic anxiety disordr unsp |
| Eu41.                         | [X]Other anxiety disorders     |
| Eu410                         | [X]Panic episodic paroxysm anx |
| Eu411                         | [X]Generalized anxiety disord  |
| Eu412                         | [X]Mixed anxiety/depressve dis |
| Eu413                         | [X]Other mixed anxiety disord  |
| Eu41y                         | [X]Other specif anxiety disord |
| Eu41z                         | [X]Anxiety disord unspecified  |
| Eu53.                         | [X]Puerperal mental disord NEC |
| Eu530                         | [X]Mild puerperal ment dis NEC |
| Eu531                         | [X]Sever puerper ment dis NEC  |
| Eu606                         | [X]Anxious                     |
| Eu920                         | [X]Depressive conduct disorder |
| Eu931                         | [X]Phobic anxiet dis childhood |
| Eu932                         | [X]Social anx dis childhood    |
| ZV111                         | [V]PH - Affective disorder     |
| <b>Lung Cancer</b>            |                                |
| B22..                         | Malig neop trachea/bronch/lung |
| B220.                         | Malig neop trachea             |
| B2201                         | Malig neop mucosa of trachea   |
| B220z                         | Malig neop trachea NOS         |
| B221.                         | Malig neop main bronchus       |
| B2210                         | Malig neop carina of bronchus  |
| B2211                         | Malig neop hilus of lung       |
| B221z                         | Malig neop main bronchus NOS   |
| B222.                         | Malig neop upp lobe bronc/lung |
| B2220                         | Malig neop upper lobe bronchus |
| B2221                         | Malig neop upper lobe of lung  |
| B222z                         | Malig neop upp bronc/lung NOS  |
| B223.                         | Malig neop mid lobe bronc/lung |
| B2230                         | Malig neop mid lobe bronchus   |
| B2231                         | Malig neop middle lobe of lung |
| B223z                         | Malig neop mid lobe bronc/lung |
| B224.                         | Malig neop low lobe bronc/lung |
| B2240                         | Malig neop lower bronchus      |
| B2241                         | Malig neop lower lobe of lung  |
| B224z                         | Malig neop low lobe bronc/lung |
| B225.                         | Mal neop                       |
| B22y.                         | Malig neop oth site bronc/lung |
| B22z.                         | Malig neop bronchus/lung NOS   |
| BB5S2                         | [M]Bronchiolo-alveolar adenoca |
| BB5S4                         | [M]Alveolar adenocarcinoma     |
| Byu20                         | [X]Mal neop/bronchus           |
| <b>Chronic Kidney Disease</b> |                                |
| 1Z1..                         | Chronic renal impairment       |
| 1Z10.                         | Chronic kidney disease stage 1 |
| 1Z11.                         | Chronic kidney disease stage 2 |
| 1Z12.                         | Chronic kidney disease stage 3 |
| 1Z13.                         | Chronic kidney disease stage 4 |
| 1Z14.                         | Chronic kidney disease stage 5 |
| 1Z15.                         | Chronic kidney diseas stage 3A |
| 1Z16.                         | Chronic kidney diseas stage 3B |
| 1Z17.                         | CKD stage 1 with proteinuria   |
| 1Z18.                         | CKD stage 1 wthout proteinuria |
| 1Z19.                         | CKD stage 2 with proteinuria   |
| 1Z1A.                         | CKD stage 2 wthout proteinuria |
| 1Z1B.                         | CKD stage 3 with proteinuria   |
| 1Z1C.                         | CKD stage 3 wthout proteinuria |

|       |                                 |
|-------|---------------------------------|
| 1Z1D. | CKD stage 3A with proteinuria   |
| 1Z1E. | CKD stge 3A without proteinuria |
| 1Z1F. | CKD stage 3B with proteinuria   |
| 1Z1G. | CKD stge 3B without proteinuria |
| 1Z1H. | CKD stage 4 with proteinuria    |
| 1Z1J. | CKD stage 4 without proteinuria |
| 1Z1K. | CKD stage 5 with proteinuria    |
| 1Z1L. | CKD stage 5 without proteinuria |
| 661M2 | CKD self-managemnt plan agreed  |
| 661N2 | CKD self-manage plan review     |
| 66i.. | CKD monitoring                  |
| 6AA.. | Chronic kid dis annual review   |
| 7A606 | Creation graft fist dialysis    |
| 7A619 | Ligat arterioven dialysis fist  |
| 7A61A | Ligat arterioven dialysis grft  |
| 7B00. | Transplantation of kidney       |
| 7B000 | Autotransplant of kidney        |
| 7B001 | Live donor kidney transplant    |
| 7B002 | Cadaver donor kidney transplnt  |
| 7B003 | Allotra kidney cad              |
| 7B004 | Allot kid cad                   |
| 7B005 | Allotranspl kidney cadaver NEC  |
| 7B006 | Xenograft renal transplant      |
| 7B00y | Transplantation of kidney OS    |
| 7B00z | Transplantation of kidney NOS   |
| 7B012 | Bilateral nephrectomy           |
| 7B063 | Exploratn of renal transplant   |
| 7B0F1 | Pre-trans kid work-up           |
| 7B0F3 | Post-tran kidney exam           |
| 7L1A. | Compensation for renal failure  |
| 7L1A0 | Renal dialysis                  |
| 7L1A1 | Peritoneal dialysis             |
| 7L1A2 | Haemodialysis NEC               |
| 7L1A4 | Automated peritoneal dialysis   |
| 7L1A5 | Cont ambulat periton dialysis   |
| 7L1A6 | Peritoneal dialysis NEC         |
| 7L1Ay | Compensation for renal fail OS  |
| 7L1Az | Compensation renal failure NOS  |
| 7L1B. | Place ambu app comp renal fail  |
| 7L1B0 | Insert ambul perit dial cathet  |
| 7L1B1 | Remove ambul perit dial cathet  |
| 7L1B2 | Flush peritoneal dialysis cath  |
| 7L1By | Pl amb app comp ren fail OS     |
| 7L1Bz | Pl amb app comp ren fail NOS    |
| 7L1C. | Place oth app comp renal fail   |
| 7L1Cy | Place app comp ren fail OS      |
| 7L1Cz | Place app comp ren fail NOS     |
| 8L50. | Renal transplant planned        |
| 9hE0. | Ex ch kid dis qu ind: Pat uns   |
| 9hE1. | Ex ch kid dis qua ind: Inf dis  |
| C104. | Diab.mell. with nephropathy     |
| C1040 | Diab.mell.+nephrop - juvenile   |
| C1041 | Diab.mell.+nephropathy - adult  |
| C104y | Oth specfd diab mel+renal comp  |
| C104z | Diab.mell.+nephropathy NOS      |
| C1080 | Insuln-dep diab mel+renal comp  |
| C1090 | Non-ins-dp diab mel+renal comp  |
| C109C | NIDDM with nephropathy          |

|       |                                |
|-------|--------------------------------|
| C10A2 | Malnut-rlt diab mel+renal comp |
| C10E0 | Type 1 d m with renal comps    |
| C10ED | Type 1 diab mell + nephropathy |
| C10F0 | Type 2 diab mell + renal compl |
| C10FC | Type 2 diab mell + nephropathy |
| D215. | Anaemia second renal failure   |
| D2150 | Anaemia secondary to CRF       |
| G22.. | Hypertensive renal disease     |
| G220. | Malignant hypertens.renal dis. |
| G221. | Benign hypertensive renal dis. |
| G222. | Hypertens renal dis+renal fail |
| G22z. | Hypertensive renal disease NOS |
| G23.. | Hypertensive heart+renal dis.  |
| G230. | Malig.hypert.heart+renal dis.  |
| G231. | Benign hypert.heart+renal dis. |
| G232. | Hypert ht&ren d+(congs)ht fail |
| G233. | Hypertn hrt&ren dis+renal fail |
| G234. | Hyp ht&ren d+both(con)h&r fail |
| G23z. | Hypertens.heart+renal dis.NOS  |
| G72D. | Aneurysm dialysis AV fistula   |
| G72D0 | Anrym sprfls atry dlys AV fstl |
| G72D1 | Anurysm nedl st dlys AV fistul |
| G72D2 | Anurysm anst st dlys AV fistul |
| Gy10. | Stenosis dialysis AV graft     |
| Gy11. | Stenosis dialysis AV shunt     |
| Gy110 | Stenosis art side dia AV shunt |
| Gy111 | Stenosis ven side dial AV sunt |
| Gy20. | Thromb dialysis AV graft       |
| Gy21. | Thromb dialysis AV fistula     |
| Gy22. | Thromb dialysis AV shunt       |
| Gy3.. | Occlusion dialysis vasc access |
| Gy30. | Occl dialysis AV graft         |
| Gy31. | Occl dialysis AV fistula       |
| Gy32. | Occl dialysis AV shunt         |
| Gy40. | Infect dialysis AV graft       |
| Gy41. | Infect dialysis AV fistula     |
| Gy42. | Infect dialysis AV shunt       |
| Gy50. | Haemorrhage dialysis AV graft  |
| Gy51. | Haemorrhge dialysis AV fistula |
| Gy52. | Haemorrhage dialysis AV shunt  |
| Gy60. | Rupture dialysis AV graft      |
| Gy61. | Rupture dialysis AV fistula    |
| Gy62. | Rupture dialysis AV shunt      |
| K05.. | Chronic renal failure          |
| K050. | End stage renal failure        |
| K051. | Chronic kidney disease stage 1 |
| K052. | Chronic kidney disease stage 2 |
| K053. | Chronic kidney disease stage 3 |
| K054. | Chronic kidney disease stage 4 |
| K055. | Chronic kidney disease stage 5 |
| K080. | Renal osteodystrophy           |
| K080z | Renal osteodystrophy NOS       |
| K08yA | Proteinuric diabetic nephrop   |
| K0D.. | End-stage renal disease        |
| K0E.. | Acute-on-chronic renal failure |
| K13C. | Chr drug-induced renal disease |
| Kyu03 | [X]Glomerulr disordrs/diab mel |
| Kyu21 | [X]Other chronic renal failure |

|                                 |                                 |
|---------------------------------|---------------------------------|
| SP06B                           | Contin amb per dial ass perit   |
| SP07G                           | Sten arterioven dialysis fist   |
| SP083                           | Kidney transplant fail+rejeectn |
| SP08C                           | Accel reject renal transplant   |
| SP08E                           | Acut reject renal trans grad I  |
| SP08F                           | Acu reject renal trans grad II  |
| SP08G                           | Acu reject rena trans grad III  |
| SP08H                           | Acute reject renal transplant   |
| SP08J                           | Chr rejection                   |
| SP08K                           | Chr rejec                       |
| SP08L                           | Chr rejec                       |
| SP08M                           | Chr rejec                       |
| SP08N                           | Unexplaind renal trans dysfunc  |
| SP08R                           | Renal transplant rejection      |
| SP08T                           | Urological complicatn renal Tx  |
| SP08W                           | Vasc complicitn renal transplnt |
| SP0E.                           | Disorders of PD                 |
| SP0E0                           | Bloodstained PD effluent        |
| SP0E1                           | Thrombus in PD catheter         |
| TB001                           | Kidney transplant+complication  |
| ZV420                           | [V]Kidney transplanted          |
| ZV451                           | [V]Renal dialysis status        |
| ZV56.                           | [V]Aftercare+intermit.dialysis  |
| ZV560                           | [V]Aftercare+extracorp.dialys.  |
| ZV561                           | [V]Preparatory care/dialysis    |
| ZV56y                           | [V]OS aftercare+intermit.dialy  |
| ZV56z                           | [V]Uns.aftercare+intermit.dial  |
| <b>Obstructive Sleep Apnoea</b> |                                 |
| Fy03.                           | Sleep apnoea                    |
| H5B0.                           | Obstructive sleep apnoea        |
| <b>Rhinosinusitis</b>           |                                 |
| 2D33.                           | O/E - nasal polyp present       |
| 74029                           | Excision polyp nasal septum     |
| 74060                           | Nasal polypectomy               |
| 74116                           | Removal of antrochoanal polyp   |
| 7416D                           | FESS/Post op remov polyps (LA)  |
| 7416F                           | FESS - polypectomy nasal sinus  |
| H11..                           | Nasal polyps                    |
| H110.                           | Polyp of nasal cavity           |
| H1100                           | Choanal polyp                   |
| H110z                           | Polyp of nasal cavity NOS       |
| H111.                           | Polypoid sinus degeneration     |
| H1110                           | Woakes' ethmoiditis             |
| H111z                           | Polypoid sinus degenerat.NOS    |
| H11y.                           | Other polyp of sinus            |
| H11y0                           | Polyp of frontal sinus          |
| H11y1                           | Polyp of ethmoidal sinus        |
| H11y2                           | Polyp of maxillary sinus        |
| H11y3                           | Polyp of sphenoidal sinus       |
| H11yz                           | Other polyp of sinus NOS        |
| H11z.                           | Nasal polyp NOS                 |
| H120.                           | Chronic rhinitis                |
| H1200                           | Chronic simple rhinitis         |
| H1201                           | Chronic catarrhal rhinitis      |
| H1202                           | Chronic hypertrophic rhinitis   |
| H1203                           | Chronic atrophic rhinitis       |
| H1204                           | Chronic infective rhinitis      |
| H1205                           | Chronic ulcerative rhinitis     |

|                           |                                |
|---------------------------|--------------------------------|
| H1206                     | Chronic membranous rhinitis    |
| H1207                     | Chronic fibrinous rhinitis     |
| H120z                     | Chronic rhinitis NOS           |
| H13..                     | Chronic sinusitis              |
| H130.                     | Chronic maxillary sinusitis    |
| H131.                     | Chronic frontal sinusitis      |
| H132.                     | Chronic ethmoidal sinusitis    |
| H133.                     | Chronic sphenoidal sinusitis   |
| H135.                     | Recurrent sinusitis            |
| H13y.                     | Other chronic sinusitis        |
| H13y0                     | Chronic pansinusitis           |
| H13yz                     | Other chronic sinusitis NOS    |
| H13z.                     | Chronic sinusitis NOS          |
| H17..                     | Allergic rhinitis              |
| H170.                     | Allergic rhinitis - pollens    |
| H171.                     | Allerg.rhinit.-other allergens |
| H172.                     | Allergic rhinitis-unsp allerg  |
| H17z.                     | Allergic rhinitis NOS          |
| Hyu21                     | [X]Other allergic rhinitis     |
| Hyu22                     | [X]Other chronic sinusitis     |
| Hyu23                     | [X]Other polyp of sinus        |
| <b>Pulmonary Fibrosis</b> |                                |
| 23E5.                     | O/E - fibrosis of lung present |
| A114.                     | Tuberculous fibrosis of lung   |
| H41..                     | Asbestosis                     |
| H41z.                     | Asbestosis NOS                 |
| H423.                     | Massive silicotic fibrosis     |
| H431.                     | Bauxite fibrosis of lung       |
| H433.                     | Graphite fibrosis of lung      |
| H4642                     | Chemical pulmonary fibrosis    |
| H48..                     | Progressive massive fibrosis   |
| H4y1.                     | Chronic pulm.radiation disease |
| H4y10                     | Radiation pulmonary fibrosis   |
| H4y1z                     | Chronic pulm.radiation dis.NOS |
| H4y21                     | Chr drg-indc interst lung diso |
| H55..                     | Postinflammatory pulm.fibrosis |
| H563.                     | Idiopath.fibrosing alveolitis  |
| H5631                     | Diffuse pulmonary fibrosis     |
| H5632                     | Pulmonary fibrosis             |
| H5633                     | Usual interstitial pneumonitis |
| H563z                     | Idiopath.fibrosing alveol.NOS  |
| h8M..                     | PIRFENIDONE                    |
| h8M1.                     | ESBRIET 267mg capsules         |
| h8M2.                     | PIRFENIDONE 267mg capsules     |
| <b>Bronchiectasis</b>     |                                |
| A115.                     | Tuberculous bronchiectasis     |
| H34..                     | Bronchiectasis                 |
| H340.                     | Recurrent bronchiectasis       |
| H341.                     | Post-infective bronchiectasis  |
| H34z.                     | Bronchiectasis NOS             |
| P861.                     | Congenital bronchiectasis      |
| <b>Diabetes</b>           |                                |
| 2BBF.                     | Retina abnormal - diabet relat |
| 2BBk.                     | O/E- R st treat prol diab ret  |
| 2BBI.                     | O/E- L st treat prol diab ret  |
| 2BBL.                     | O/E - diabet maculop both eyes |
| 2BBo.                     | O/E - sight threat diab retin  |
| 2BBP.                     | O/E - right eye back diab ret  |

|       |                                |
|-------|--------------------------------|
| 2BBQ. | O/E - left eye back diab ret   |
| 2BBR. | Impair vision due diab retinop |
| 2BBR. | O/E - R eye preprolif diab ret |
| 2BBS. | O/E - L eye preprolif diab ret |
| 2BBT. | O/E - R eye prolif diab ret    |
| 2BBV. | O/E - L eye prolif diab ret    |
| 2BBW. | O/E - R eye diab maculopathy   |
| 2BBX. | O/E - L eye diab maculopathy   |
| 2G510 | Foot abnormal-diabetes related |
| 2G5A. | O/E-Right diabet foot at risk  |
| 2G5B. | O/E-Left diabet foot at risk   |
| 2G5C. | Foot abnormal-diabetes related |
| 2G5d. | O/E - L diab foot at incre rsk |
| 2G5e. | O/E - R diab foot at incre rsk |
| 2G5E. | O/E - R diab foot at low risk  |
| 2G5F. | O/E - R diab foot at mod risk  |
| 2G5G. | O/E - R diab foot at high risk |
| 2G5H. | O/E - R diab foot - ulcerated  |
| 2G5I. | O/E - L diab foot at low risk  |
| 2G5J. | O/E - L diab foot at mod risk  |
| 2G5K. | O/E - L diab foot at high risk |
| 2G5L. | O/E - L diab foot - ulcerated  |
| 2G5V. | O/E - R chron diab foot ulcer  |
| 2G5W. | O/E - L chron diab foot ulcer  |
| 661M4 | Diabet self-manage plan agreed |
| 661N4 | Diabetes self-manage pln revw  |
| 66A2. | Follow-up diabetic assessment  |
| 66A3. | Diabetic on diet only          |
| 66A4. | Diabetic on oral treatment     |
| 66A5. | Diabetic on insulin            |
| 66AH. | Diabetic treatment changed     |
| 66AH0 | Conversion to insulin          |
| 66AH1 | Convrns to insulin in 2ry care |
| 66AH2 | Convrns to insul diab spec nrs |
| 66AH3 | Convrnsn non-insulin injet med |
| 66Ai. | Diabetic 6 month review        |
| 66Ai. | Diabetic - good control        |
| 66AJ. | Diabetic - poor control        |
| 66AJ1 | Brittle diabetes               |
| 66AJz | Diabetic - poor control NOS    |
| 66AK. | Diabetic - cooperative patient |
| 66AL. | Diabetic-uncooperative patient |
| 66Am. | Insulin dose changed           |
| 66An. | Diabetes type 1 review         |
| 66AN. | Date diabetic treatment start  |
| 66Ao. | Diabetes type 2 review         |
| 66Ap. | Insulin treatment initiated    |
| 66AP. | Diabetes: practice programme   |
| 66AQ. | Diabetes: shared care program. |
| 66AQ1 | Decl conse diab year care prog |
| 66AR. | Diabetes management plan given |
| 66As. | Diab on subcutaneous treatment |
| 66AS. | Diabetic annual review         |
| 66AS0 | Diabetes Yr of Cre annual revw |
| 66At0 | Type I diabetic dietary review |
| 66At1 | Type II diabetic dietary revie |
| 66Au. | Diab erectile dysfunction rev  |
| 66AU. | Diabetes care by hospital only |

|       |                                  |
|-------|----------------------------------|
| 66Av. | Diabetic ass erect dysfunction   |
| 66AV. | Diabetic on insulin+oral treat   |
| 66o0. | Incretin mimetic treatmnt strt   |
| 679c. | Insulin administratn education   |
| 679L0 | Educa self management diabetes   |
| 679L2 | Education diabetes and driving   |
| 679R. | Pt offered diab struct ed prog   |
| 67D8. | Provisn diab clin summary        |
| 7276. | Pan retinal photocoag diabetes   |
| 7L100 | Contin subcut infusion insulin   |
| 7L198 | Subcutaneous injection insulin   |
| 8A12. | Diabetic crisis monitoring       |
| 8A13. | Diabetic stabilisation           |
| 8B3I. | Diabetes medication review       |
| 8BAi. | Insulin passport completed       |
| 8BAj. | Inf dis not carry insulin pass   |
| 8BAm. | Insulin passport checked         |
| 8BL2. | Pt on max tol ther for diabet    |
| 8CE02 | Insulin passport given           |
| 8CMW7 | Diabetes clinical pathway        |
| 8CP2. | Transition DM care opt discuss   |
| 8CR2. | Diabetes clin management plan    |
| 8CS0. | Diabetes care plan agreed        |
| 8H2J. | Admit diabetic emergency         |
| 8H3O. | Non-urgent diabetic admission    |
| 8HBG. | Diab retinopathy 12 mth review   |
| 8HKE. | Diabetology D.V. requested       |
| 8HLE. | Diabetology D.V. done            |
| 8HME. | Listed for Diabetology admissn   |
| 8I3k. | Insulin therapy declined         |
| 9h42. | Excep diabet qual ind: Inf dis   |
| 9kL.. | Insulin init - enh serv admin    |
| 9m07. | Exc diab ret scr undr ophthalm   |
| 9m08. | Exclu diab ret screen as blind   |
| 9N1Q. | Seen in diabetic clinic          |
| 9NN9. | Under care of diab spec nurse    |
| 9OL1. | Attends diabetes monitoring      |
| 9OL2. | Refuses diabetes monitoring      |
| 9OLA. | Diabetes monitor. check done     |
| 9OLD. | Diabet pt unsuit dig ret photo   |
| C10.. | Diabetes mellitus                |
| C100. | Diab.mell. - no complication     |
| C1000 | Diab.mell.no comp. - juvenile    |
| C1001 | Diab.mell.no comp. - adult       |
| C100z | Diab.mell.no comp. - onset NOS   |
| C101. | Diab.mell.with ketoacidosis      |
| C1010 | Diab.mell.+ketoacid - juvenile   |
| C1011 | Diab.mell.+ketoacid - adult      |
| C101y | Oth specfd diab mel+ketoacidosis |
| C101z | Diab.mell.+ketoacid -onset NOS   |
| C102. | Diab.mell. + hyperosmolar coma   |
| C1020 | Diab.mell+hyperosm.coma-juveni   |
| C1021 | Diab.mell.+hyperosm.coma-adult   |
| C102z | Diabetes+hyperosmolar coma NOS   |
| C103. | Diab.mell. + ketoacidotic coma   |
| C1030 | Diab.mell.+ketoac coma-juvenil   |
| C1031 | Diab.mell.+ketoac coma - adult   |
| C103y | Oth specif diab mell with coma   |

|       |                                |
|-------|--------------------------------|
| C103z | Diab.mell.+ketoac coma NOS     |
| C104. | Diab.mell. with nephropathy    |
| C1040 | Diab.mell.+nephrop - juvenile  |
| C1041 | Diab.mell.+nephropathy - adult |
| C104y | Oth specfd diab mel+renal comp |
| C104z | Diab.mell.+nephropathy NOS     |
| C105. | Diab.mell.+ eye manifestation  |
| C1050 | Diab.mell.+eye manif -juvenile |
| C1051 | Diab.mell.+eye manif - adult   |
| C105y | Oth specfd diab mel+ophth comp |
| C105z | Diab.mell.+eye manif NOS       |
| C106. | Diab.mell. with neuropathy     |
| C1060 | Diab.mell.+neuropathy-juvenile |
| C1061 | Diab.mell.+neuropathy - adult  |
| C106y | Oth specf diab mel+neuro comps |
| C106z | Diab.mell.+neuropathy NOS      |
| C107. | Diab.mell.+periph.circul.dis   |
| C1070 | Diab.+periph.circ.dis-juvenile |
| C1071 | Diab.+periph.circ.dis.-adult   |
| C1072 | Diabetic gangrene - adult      |
| C1073 | IDDM periph circulatory disord |
| C1074 | NIDDM periph circulat disord   |
| C107y | Oth spcf diab mel+per circ cmp |
| C107z | Diab.+periph.circ.disease NOS  |
| C108. | Insulin depnd diabetes melitus |
| C1080 | Insuln-dep diab mel+renal comp |
| C1081 | Insul-dep diab mel+ophth comps |
| C1082 | Insul-dep diab mel+neuro comps |
| C1083 | Insul dep diab mel+multi comps |
| C1084 | Unstab insul depend diab mell  |
| C1085 | Insul depen diab mel+ulcer     |
| C1086 | Insulin depen diab mel+gangren |
| C1087 | Insul-depend diab mell+retinop |
| C1088 | Insul dep diab mell-poor contr |
| C1089 | Insulin dep diabet adult onset |
| C108A | Insulin-dependent dm no comp   |
| C108B | IDDM with mononeuropathy       |
| C108C | IDDM with polyneuropathy       |
| C108D | IDDM with nephropathy          |
| C108E | IDDM with hypoglycaemic coma   |
| C108F | IDDM with diabetic cataract    |
| C108G | IDDM with peripheral angiopath |
| C108H | IDDM with arthropathy          |
| C108J | IDDM with neuropath arthropath |
| C108y | Oth specf diab mel+multip comp |
| C108z | Unspecifd diab mel+multip comp |
| C109. | Non-insulin depd diabetes mell |
| C1090 | Non-ins-dp diab mel+renal comp |
| C1091 | Non-ins-dp diab mel+ophth comp |
| C1092 | Non-ins-dp diab mel+neuro comp |
| C1093 | Non-ins-dp diab mel+multi comp |
| C1094 | Non-insul depen diab mel+ulcer |
| C1095 | Non-insulin dep diab mell+gang |
| C1096 | Non-insul dep diab mel+retinop |
| C1097 | Non-insul dep diab-poor contr  |
| C1099 | Non-insul-dep diab mel no comp |
| C109A | NIDDM with mononeuropathy      |
| C109B | NIDDM with polyneuropathy      |



|       |                                |
|-------|--------------------------------|
| C109C | NIDDM with nephropathy         |
| C109D | NIDDM with hypoglycaemic coma  |
| C109E | NIDDM with diabetic cataract   |
| C109F | NIDDM with periph angiopath    |
| C109G | NIDDM with arthropathy         |
| C109H | NIDDM with neuropath arthrop   |
| C109J | Insul treated Type 2 diab mell |
| C109K | Hyperos non-ket stat typ 2 d m |
| C10A. | Malnutritn-relat diab mellitus |
| C10A0 | Malnutrtn-reltd diab mell+coma |
| C10A1 | Malnut-rlat diab mell+ketoacid |
| C10A2 | Malnut-rlt diab mel+renal comp |
| C10A3 | Malnut-rlt diab mel+ophth comp |
| C10A4 | Malnut-rlt diab mel+neuro comp |
| C10A5 | Malnut-rlt diab mel+per circ c |
| C10A6 | Malnut-rlt diab mel+multi comp |
| C10A7 | Malnut-rlt diab mel w/out comp |
| C10AW | Maln-rel diab m + unsp comp    |
| C10AX | Maln-rel diab m+ot sp comps    |
| C10B. | Diabet mel induced by steroids |
| C10B0 | Sterod ind diab mel w/out comp |
| C10C. | Diab mell aut dom              |
| C10D. | Diab mell aut dom type 2       |
| C10E. | Type 1 diabetes mellitus       |
| C10E0 | Type 1 d m with renal comps    |
| C10E1 | Type 1 diab mell + ophth comps |
| C10E2 | Type 1 diab mell + neuro comps |
| C10E3 | Type 1 diab mell + mult comps  |
| C10E4 | Unstab type 1 diabet mellitus  |
| C10E5 | Type 1 diab mell with ulcer    |
| C10E6 | Type 1 diab mell with gangrene |
| C10E7 | Type 1 diab mell + retinopathy |
| C10E8 | Type 1 diab mell poor control  |
| C10E9 | Type 1 diab mell matur onset   |
| C10EA | Type 1 diab mell without comp  |
| C10EB | Type 1 diab mell + mononeurop  |
| C10EC | Type 1 diab mell + polyneurop  |
| C10ED | Type 1 diab mell + nephropathy |
| C10EE | Type 1 diab mell + hypo coma   |
| C10EF | Type 1 diab mell + diab catar  |
| C10EG | Type 1 diab mell+periph angiop |
| C10EH | Type 1 diab mell + arthropathy |
| C10EJ | Type 1 diab mell+neuro arthrop |
| C10EK | Type 1 d m + persist proteinur |
| C10EL | Type 1 d m + persist microalb  |
| C10EM | Type 1 d m with ketoacidosis   |
| C10EN | Type 1 d m+ketoacidotic coma   |
| C10EP | Type 1 d m + exudat maculopath |
| C10EQ | Type 1 dm with gastroparesis   |
| C10ER | Latent autoimm diab mell adult |
| C10F. | Type 2 diabetes mellitus       |
| C10F0 | Type 2 diab mell + renal compl |
| C10F1 | Type 2 diab mell+ophthal comp  |
| C10F2 | Type 2 diab mell + neurol comp |
| C10F3 | Type 2 diab mell + multip comp |
| C10F4 | Type 2 diab mell with ulcer    |
| C10F5 | Type 2 diab mell + gangrene    |
| C10F6 | Type 2 diab mell + retinopathy |

|       |                                |
|-------|--------------------------------|
| C10F7 | Type 2 diab mell+poor control  |
| C10F9 | Type 2 diab mell without comp  |
| C10FA | Type 2 diab mell mononeurop    |
| C10FB | Type 2 diab mell + polyneurop  |
| C10FC | Type 2 diab mell + nephropathy |
| C10FD | Type 2 diab mell+hypogly coma  |
| C10FE | Type 2 diab mell+diab catarct  |
| C10FF | Type 2 diab mell+perip angiop  |
| C10FG | Type 2 diab mell + arthropathy |
| C10FH | Type 2 diab mell neurop+arthr  |
| C10FJ | Insul treated Type 2 diab mell |
| C10FK | Hyperos non-ket stat typ 2 d m |
| C10FL | Type 2 d m + persist proteinur |
| C10FM | Type 2 d m + persist microalb  |
| C10FN | Type 2 d m with ketoacidosis   |
| C10FP | Type 2 d m+ketoacidotic coma   |
| C10FQ | Type 2 d m + exudat maculopath |
| C10FR | Type 2 dm with gastroparesis   |
| C10FS | Matern inherited diabetes mell |
| C10G. | Secondary pancreatic dm        |
| C10G0 | Second pancr dm without comp   |
| C10H. | DM induced by non-steroid drug |
| C10H0 | DM ind non-ster dru withou com |
| C10M. | Lipoatrophic diabetes mellitus |
| C10M0 | Lipoatrophic dm without comp   |
| C10N. | Secondary diabetes mellitus    |
| C10N0 | Secondary d m without comp     |
| C10N1 | Cyst fibro relat diab mellitus |
| C10y. | Diab.mell.+other manifestation |
| C10y0 | Diab.mell.+oth manif.-juvenile |
| C10y1 | Diab.mell.+other manif. -adult |
| C10yy | Oth spec diab mel+oth spec cmp |
| C10yz | Diab.mell.+other manifest NOS  |
| C10z. | Diab.mell. + unspec comp       |
| C10z0 | Diab.mell.+comp NOS - juvenile |
| C10z1 | Diab.mell.+comp NOS - adult    |
| C10zy | Oth specf diab mel+unspec comp |
| C10zz | Diab.mell. + unspec comp NOS   |
| C11y0 | Steroid induced diabetes       |
| Cyu2. | [X]Diabetes mellitus           |
| Cyu20 | [X]Oth specf diabetes mellitus |
| Cyu21 | [X]Maln-rel diab m+ot sp comps |
| Cyu22 | [X]Maln-rel diab m + unsp comp |
| Cyu23 | [X]Unspec diab mel + ren compl |
| F1711 | Autonomic neuropathy-diabetes  |
| F3450 | Diabet mononeuritis multiplex  |
| F35z0 | Diabetic mononeuritis NOS      |
| F372. | Polyneuropathy in diabetes     |
| F3720 | Acute painful diab neuropathy  |
| F3721 | Chron painful diab neuropathy  |
| F3722 | Asymptomatic diab neuropathy   |
| F3813 | Myasthenic syndrome+diabetes   |
| F3y0. | Diabetic mononeuropathy        |
| F420. | Diabetic retinopathy           |
| F4200 | Background diabetic retinopath |
| F4201 | Proliferative diabetic retinop |
| F4202 | Preproliferative diabetic ret  |
| F4203 | Advanced diabetic maculopathy  |

|       |                                  |
|-------|----------------------------------|
| F4204 | Diabetic maculopathy             |
| F4205 | Advanced diabetic retinal dis    |
| F4206 | Non prolifer diab retinop        |
| F4207 | High risk prolifer diab retinop  |
| F4208 | High risk non prolifer dia retin |
| F420z | Diabetic retinopathy NOS         |
| F4213 | Hypertensive retinopathy         |
| F4407 | Diabetic iritis                  |
| G73y0 | Diabetic peripheral angiopathy   |
| K01x1 | Nephrotic syndrome+diabetes M.   |
| K08yA | Proteinuric diabetic nephrop     |
| Kyu03 | [X]Glomerulr disordrs/diab mel   |
| L1805 | Pre-ex diab mell/insuln-depend   |
| L1806 | Pre-ex diab mel non insuln-dep   |
| L1807 | Pre-ex malnutrtn-rlat diab mel   |
| L180X | Pre-existing diab mel            |
| M0372 | Cellulitis in diabetic foot      |
| M21yC | Insulin lipohypertrophy          |
| M2710 | Ischaemic ulcer diabetic foot    |
| M2711 | Neuropathic diab ulcer - foot    |
| M2712 | Mixed diabetic ulcer - foot      |
| N0300 | Diabetic cheiroarthropathy       |
| N0301 | Diabetic Charcot arthropathy     |
| PKyP. | Diab ins                         |
| R0542 | [D]Gangrene of toe in diabetic   |
| R0543 | [D]Widespread diab foot gangr    |
| ZV6DA | [V]Admitted commence insulin     |
| ZV6DB | [V]Admitted conversion insulin   |

## References

- 1 Benson T. The history of the Read codes: the inaugural James Read Memorial Lecture 2011. *Journal of Innovation in Health Informatics* **19**, 173-182, doi:10.14236/jhi.v19i3.811 (2011).
- 2 NHS Digital Technology Reference Data Update Distribution (TRUD). *READ Codes*, <<https://isd.digital.nhs.uk/trud3/user/guest/group/0/pack/9>> (2019).
- 3 NHS Digital. *Quality Outcomes Framework (QOF)*, <<https://digital.nhs.uk/data-and-information/data-tools-and-services/data-services/general-practice-data-hub/quality-outcomes-framework-qof>> (2019).
- 4 NHS Digital. *Quality and Outcomes Framework (QOF), enhanced services and core contract extraction specifications (business rules)*, <<https://digital.nhs.uk/data-and-information/data-collections-and-data-sets/data-collections/quality-and-outcomes-framework-qof>> (2019).
- 5 NHS Digital. *Secondary Uses Service (SUS)*, <<http://content.digital.nhs.uk/sus>> (2018).
- 6 World Health Organisation. *Classifications*, <<http://www.who.int/classifications/icd/en/>> (2018).
- 7 NHS Digital. *NHS Data Model and Dictionary Version 3: Admission Method*, <[https://www.datadictionary.nhs.uk/data\\_dictionary/attributes/a/add/admission\\_method\\_de.asp](https://www.datadictionary.nhs.uk/data_dictionary/attributes/a/add/admission_method_de.asp)> (2019).
- 8 NHS Digital. *NHS Data Model and Dictionary Version 3: Accident and Emergency Diagnosis Tables*, <[http://www.datadictionary.nhs.uk/web\\_site\\_content/supporting\\_information/clinical\\_coding/accident\\_and\\_emergency\\_diagnosis\\_tables.asp](http://www.datadictionary.nhs.uk/web_site_content/supporting_information/clinical_coding/accident_and_emergency_diagnosis_tables.asp)> (2018).
- 9 Quanjer PH *et al.* Lung volumes and forced ventilatory flows. Official statement of the European Respiratory Society. *Eur Respir J* **6**, 5-40 (1993).
- 10 Jones RC *et al.* Derivation and validation of a composite index of severity in chronic obstructive pulmonary disease: the DOSE Index. *Am J Respir Crit Care Med* **180**, 1189-1195, doi:10.1164/rccm.200902-0271OC (2009).
- 11 Sundh J, Montgomery S, Stallberg B & Lisspers K. Assessment of COPD in primary care: new evidence supports use of the DOSE index. *Prim Care Respir J* **22**, 142-143, doi:10.4104/pcrj.2013.00050 (2013).
